# Supplementary material for: Decoding regioselective reaction mechanism of gentisic acid catalyzed by the gentisate 1,2-dioxygenase enzyme
Source: Royal Society of Chemistry journal article supplement (doi:10.1039/d2cy00510g), 2022-01-01
Supplement: d2cy00510g1.pdf [file d2cy00510g1.pdf]

## Supporting Information

### Decoding Regioselective Reaction Mechanism of the Gentisic Acid Catalyzed by Gentisate 1,2-Dioxygenase Enzyme

Rounak Nath,<sup>#</sup> Rabindra Nath Manna,<sup>#</sup> Ankan Paul\*

School of Chemical Sciences, Indian Association for the Cultivation of Sciences, Kolkata, 700032, India.

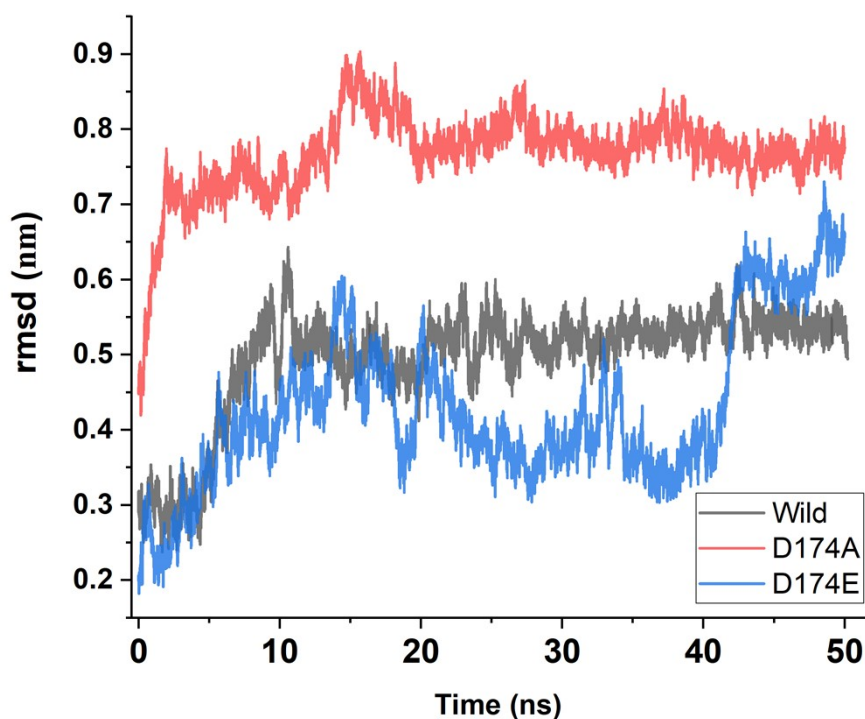

**Figure S1.** Time evolution of root means square deviation (RMSD) of the protein backbone of wild type GDO and its mutate enzymes (such as D174A, D174E) with respect to their corresponding crystal structure obtained from the classical MD simulations.

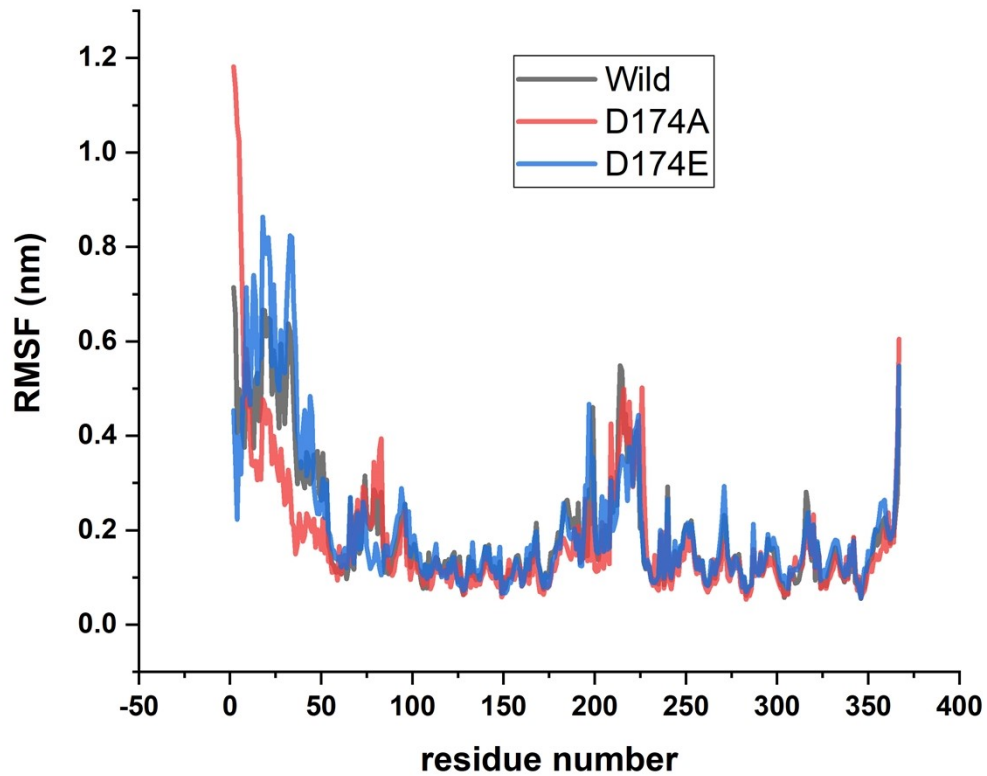

**Figure S2.** Time evolution of root means square fluctuation (RMSF) of the protein of wild type GDO and its mutate enzymes (such as D174A, D174E) with respect to their corresponding crystal structure obtained from the classical MD simulations.

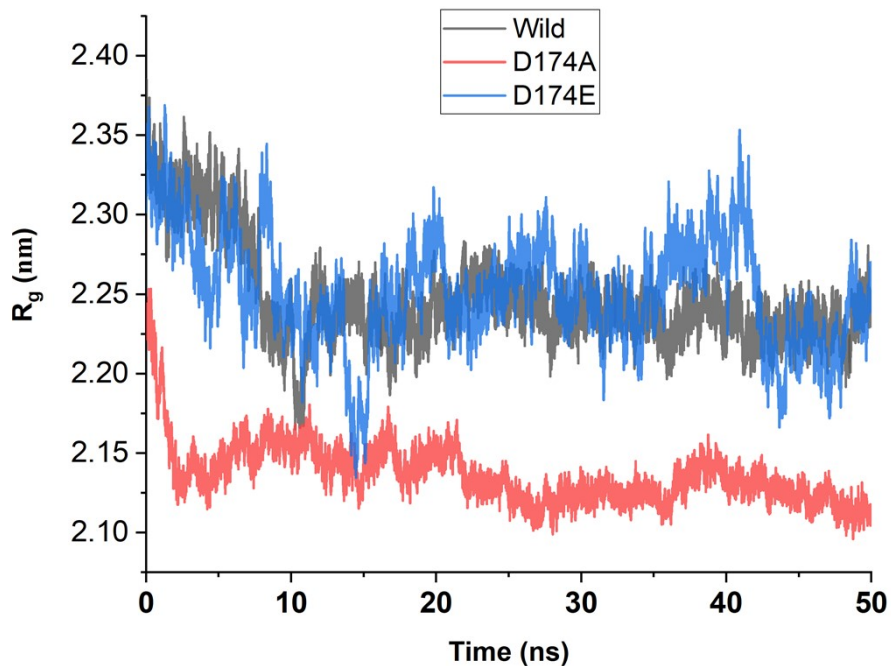

**Figure S3.** Radius of gyration ( $R_g$ ) of the protein backbone of wild type GDO and its mutate enzymes (such as D174A, D174E) obtained from the classical MD simulations.

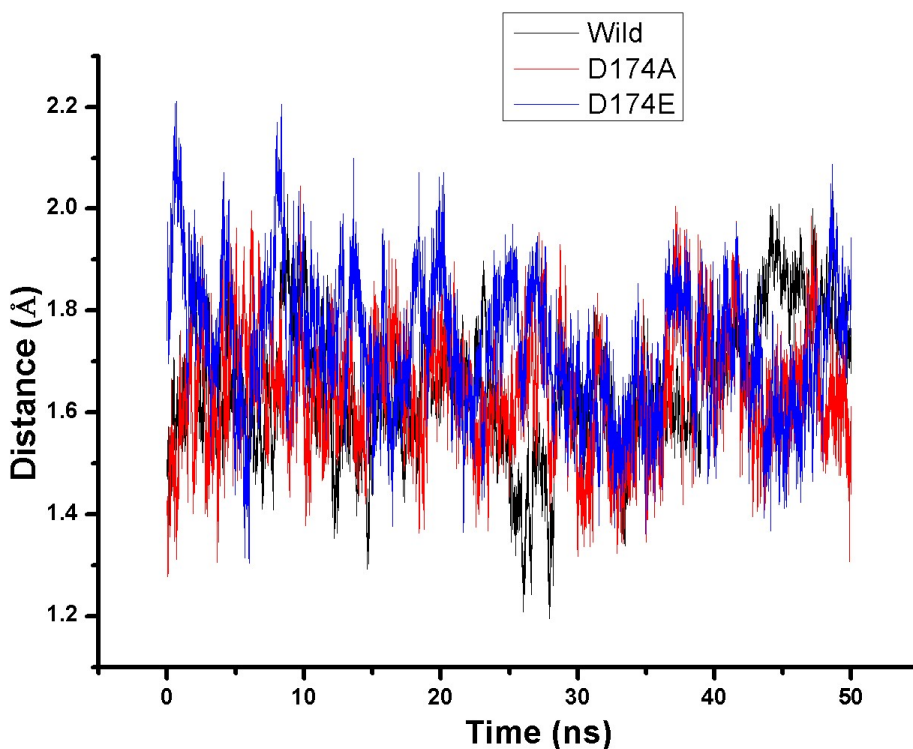

**Figure S4.** Time evolution of the distance between the  $O_{w1}$  atom of the W2 water and the  $H_d$  atom of the GTQ for the wild type GDO and its mutate enzymes (such as D174A, D174E) obtained from the classical MD simulations.

After the classical MD simulations, we witnessed that there were three water molecules present in the active site of the GDO enzyme. Classical MD simulations of the whole enzyme disclosed a sharp peak in the radial distribution function ( $g(r)$ ) between iron and water at  $\sim 4.5\text{\AA}$  distance (Figure S5a). Thus, it strongly suggests that the active center of the enzyme is hydrated. Additionally, the coordination number plot (Figure S5b) clearly displays that two water molecules are present in the close vicinity ( $\sim 4.5\text{\AA}$ ) of the iron center. Furthermore, equilibrium MD simulations revealed that with the progression of the simulations, the interatomic distance of  $(GTQ)H_d-O_{w1}(H_2O)$  is within the range of  $2.2\text{\AA}$  (Figure S4). We strongly believe that these water molecules form hydrogen bonds with the GTQ moiety. We notice that these water molecules come from the bulk water region to the active site of the GTQ-GDO enzyme complex during the simulations. Thus, it is reasonable to believe that the presence of these water molecules in the active site of GTQ-GDO enzyme is not a mere artifact, rather stabilizing hydrogen bond interaction pulls the single water molecule from bulk to come in the close vicinity of the substrate GTQ. Recently, QM/MM studies on Glycoside Hydrolases enzymes showed that the presence of water in the active site of the enzyme can influence the barrier of a reaction. Such presence of water in the enzyme pocket was indicated by classical MD simulations.<sup>1</sup>

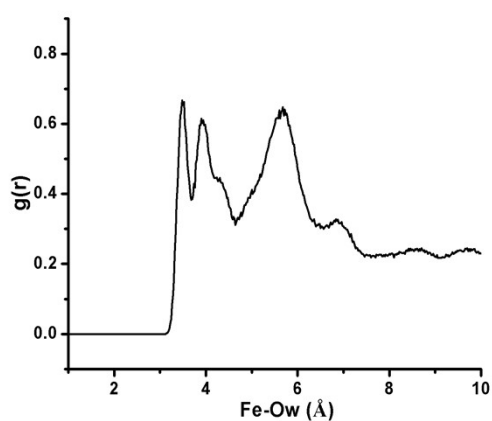

(a)

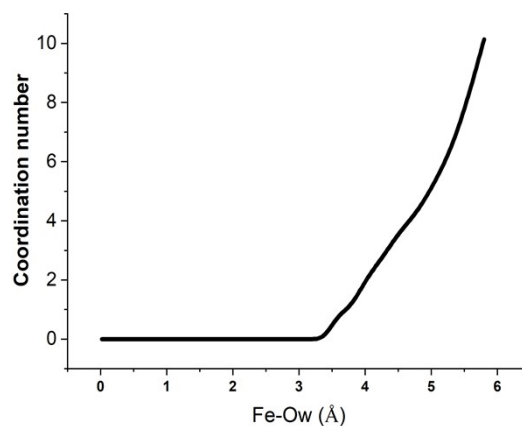

(b)

**Figure S5.** (a) Radial distribution function ( $g(r)$ ) and (b) Coordination number of waters around iron obtained from the classical MD simulations.

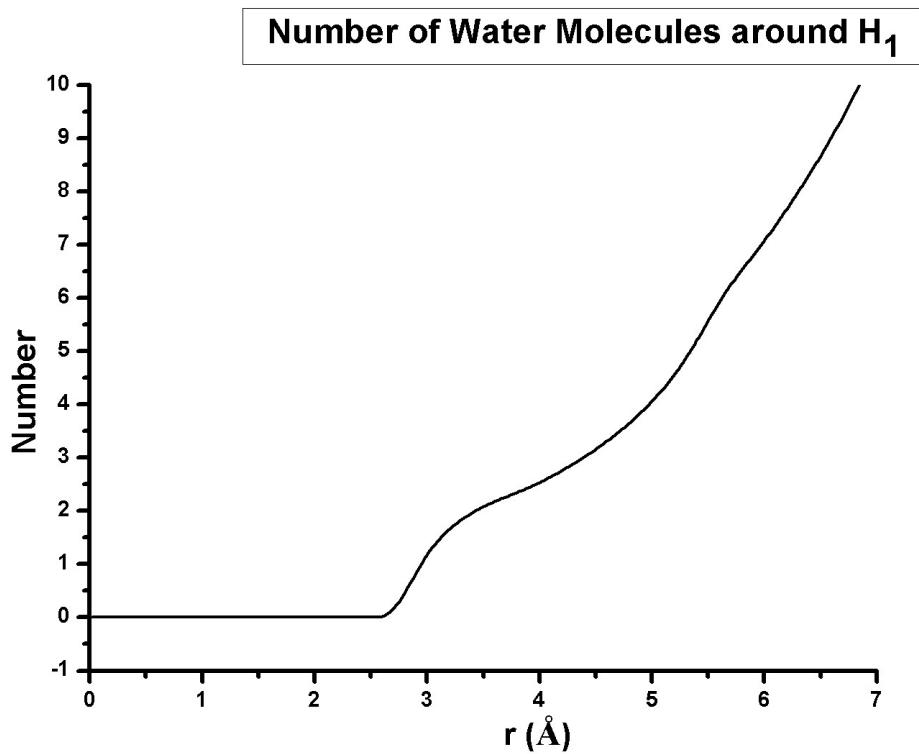

**Figure S6.** Coordination number of waters around the  $H_1$  atom of GTQ substrate up to 7 Å radius obtained from the classical MD simulations.

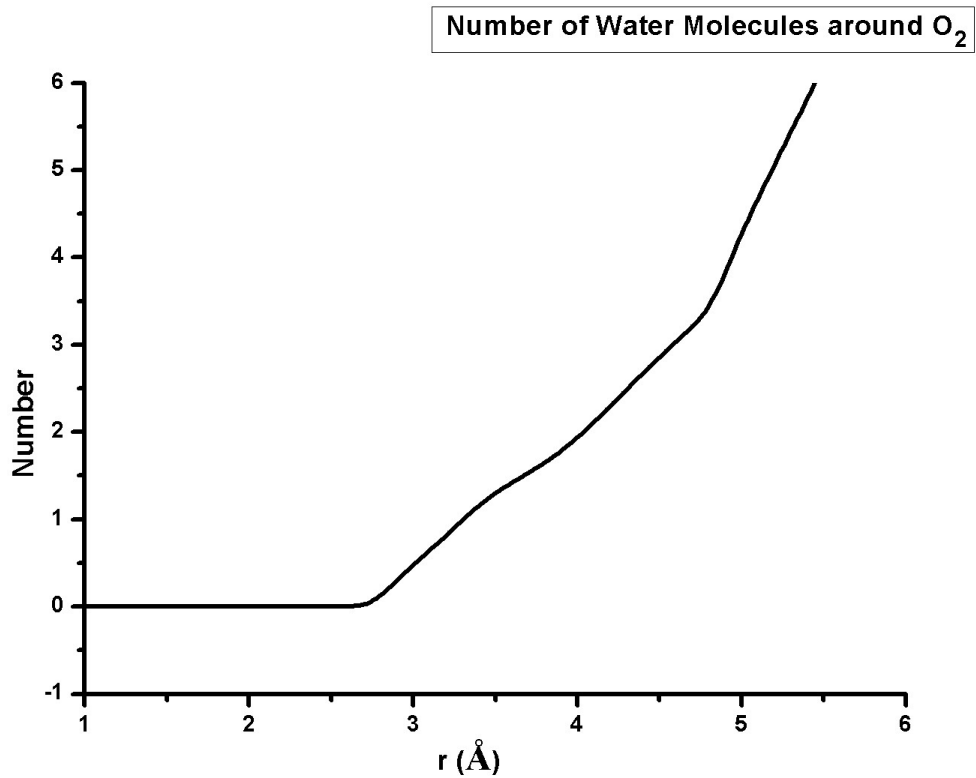

**Figure S7.** Coordination number of waters around molecular oxygen up to 6 Å radius obtained from the classical MD simulations.

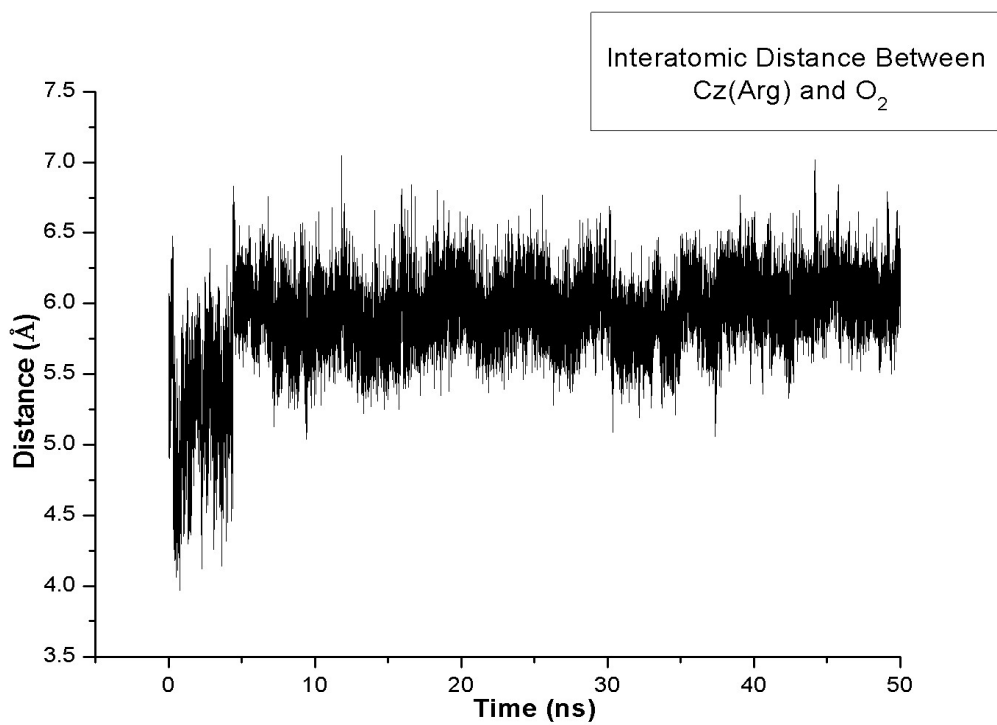

**Figure S8.** Interatomic distances between the Cz atom of Arg127 and dioxygen molecule in the active site of GDO enzyme obtained from the classical MD simulations.

### Discussion on Spin States of Dioxygen bound State

In our starting substrate (1) we have found that molecular oxygen is non interacting with  $\text{Fe}^{2+}$  in both triplet and septet spin states. We have predicted that one of the electrons of triplet molecular oxygen re orients it's spin due to high spin-orbit coupling and it is quite natural phenomena in presence of an atom like iron with high molecular weight. Then one of the unpaired electrons from  $\text{Fe}^{2+}$  transfers to  $\pi^*$ orbital of dioxygen resulting  $\text{Fe}^{3+}..O_2^-$  couple (Figure S9) and it is supported by orbital analysis using ORCA program.

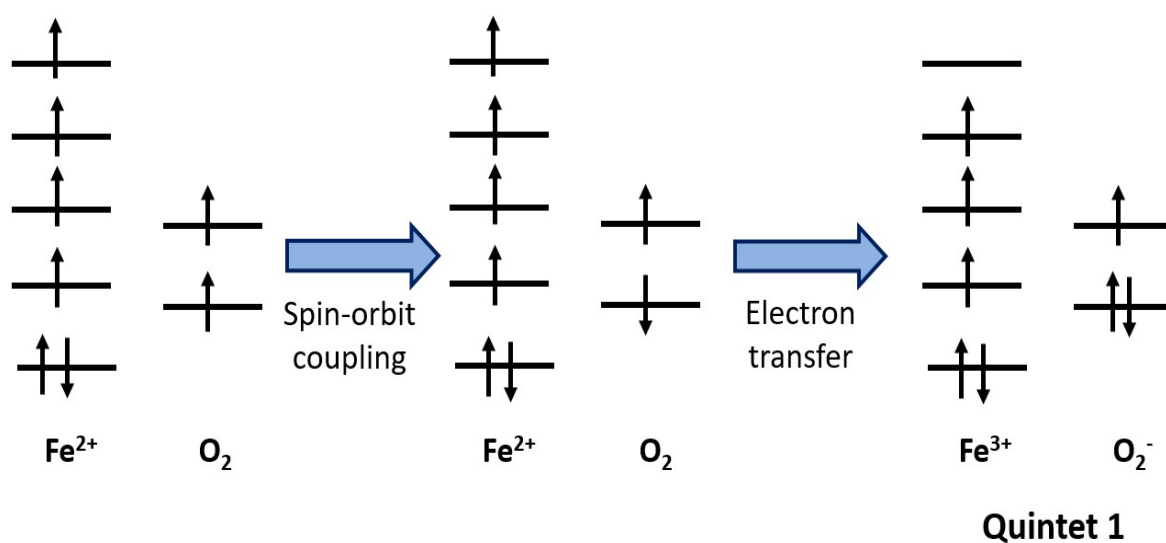

**Figure S9.** The change of valance electron configuration via spin-orbit coupling and transfer of one electron from  $\text{Fe}^{2+}$  to  $\text{O}_2$ .

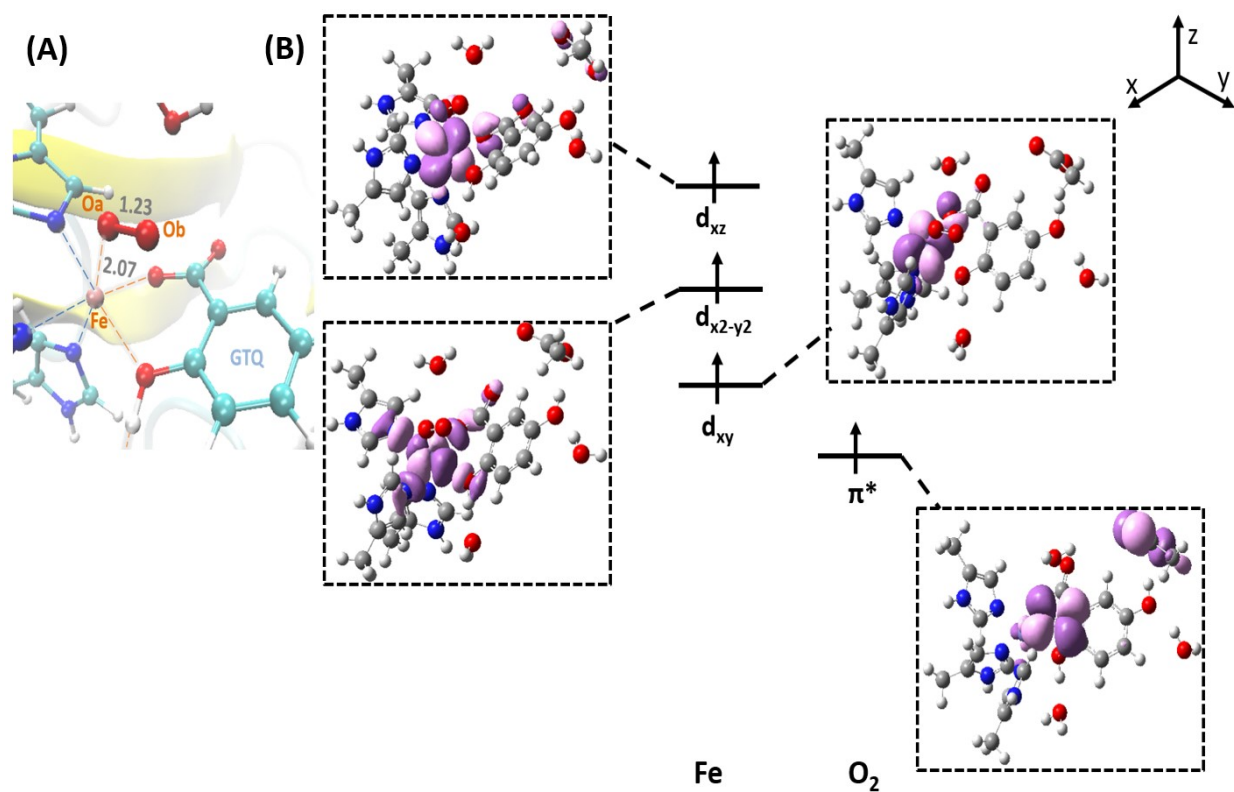

**Figure S10.** (A) Optimized geometry of 1 in quintet surface (distances are in Å). (B) Schematic MO diagram for the O<sub>2</sub> adduct (1) in quintet spin state (only unpaired electrons are shown).

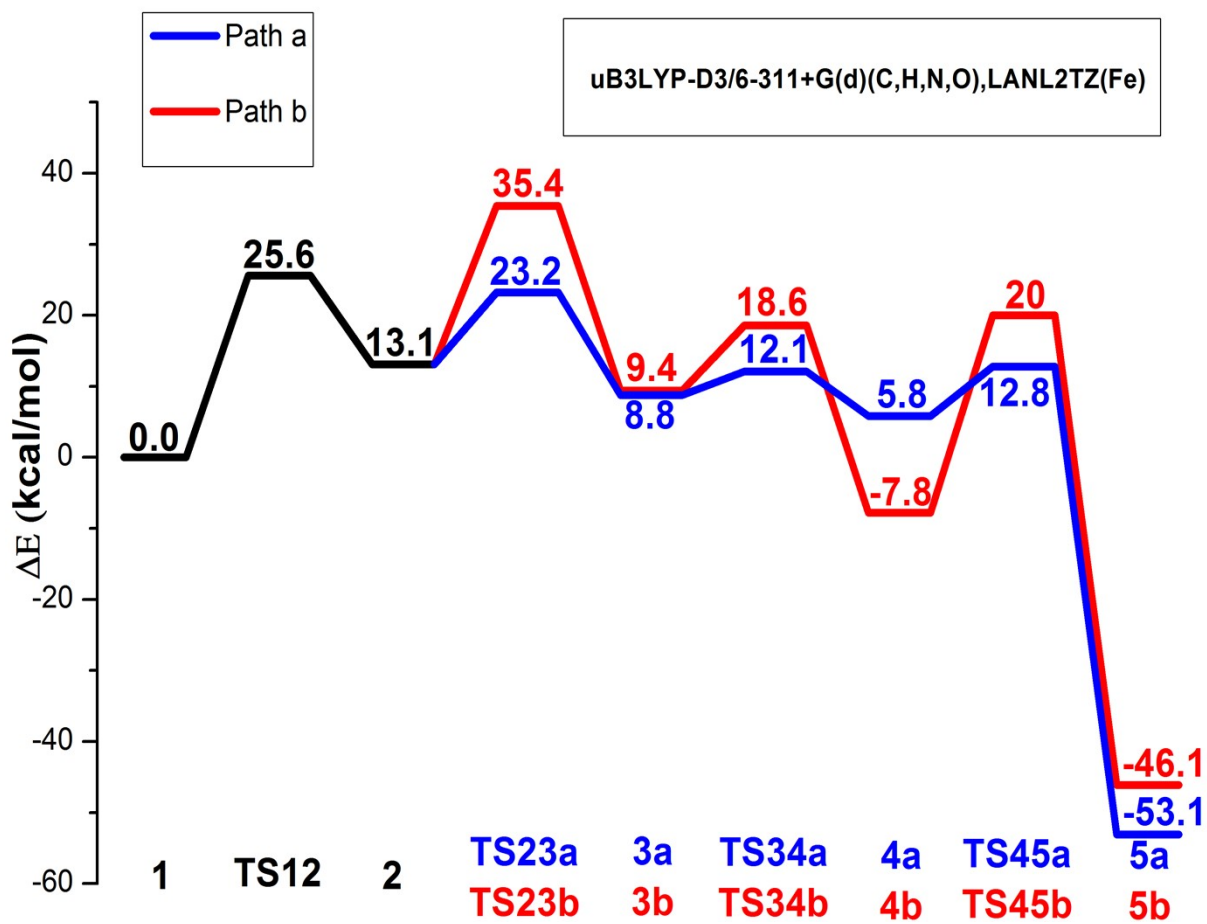

**Figure S11.** The potential energy profile for the oxidative cleavage of the C-C aromatic bond of the GTQ substrate in the active site of the GDO enzyme following pathway A and B at the uB3LYP-D3/6-311+G(d)(C,H,N,O), LANL2TZ(Fe)/OPLS level of theory.



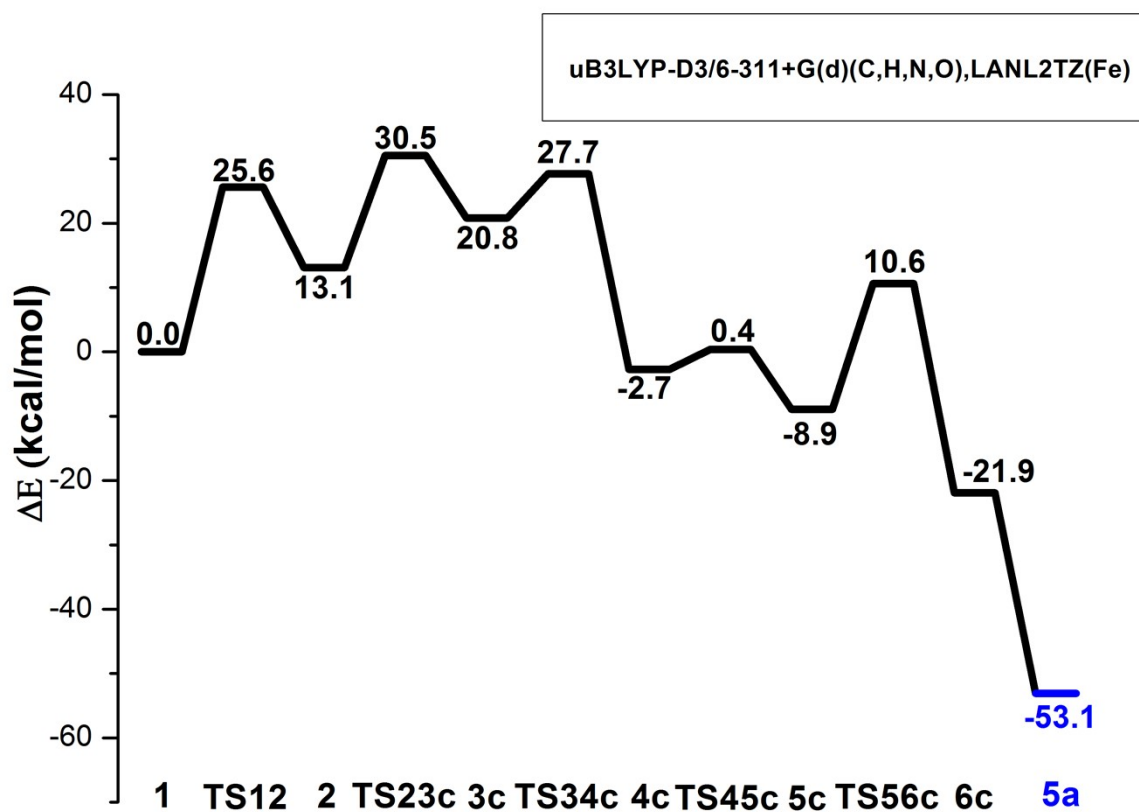

**Figure S12.** The potential energy profile for the oxidative cleavage of the C-C aromatic bond of the GTQ substrate in the active site of the GDO enzyme following pathway C at the uB3LYP-D3/6-311+G(d)(C,H,N,O), LANL2TZ(Fe)/OPLS level of theory.

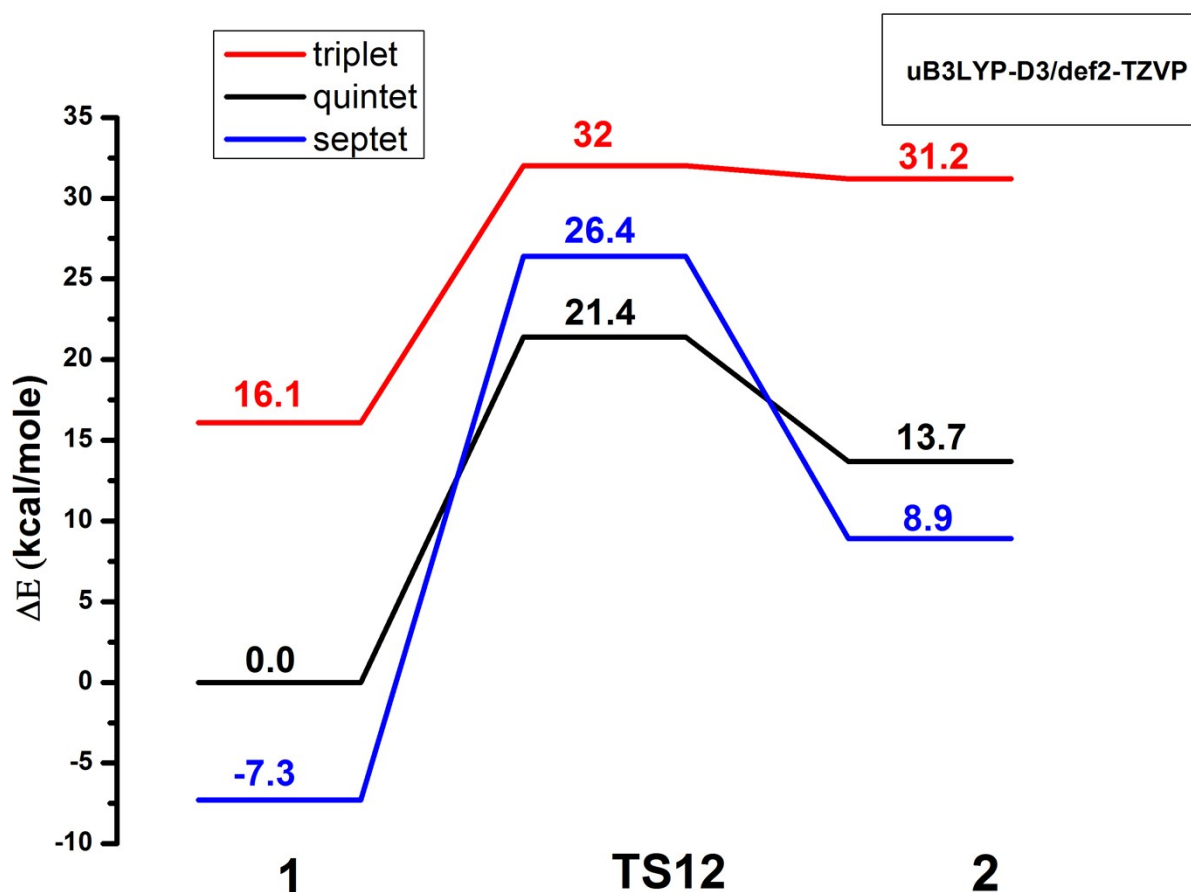

**Figure S13.** The potential energy profiles for the formation of alkylperoxy intermediate in the active site of the GDO enzyme on the quintet (black), triplet (red) and septet (blue) spin states at the uB3LYP-D3/def2-TZVP/OPLS level of theory.

**Table S1.** Calculated potential Energy (KJ/mol) for the all the stationary structures for the degradation of GTQ substrate catalyzed by GDO enzyme at the uB3LYP-D3/def2-TZVP/OPLS and uB3LYP-D3/6-311+G(d,p)(C, H, N, O),LANL2TZ(Fe)/OPLS level of theory on the quintet spin state respectively.

| Structure   | uB3LYP-D3/def2-TZVP/OPLS level of theory |                       | uB3LYP-D3/6-311+G(d,p)(C,H,N,O), LANL2TZ(Fe)/OPLS level of theory |                       |
|-------------|------------------------------------------|-----------------------|-------------------------------------------------------------------|-----------------------|
|             | Potential Energy (kj/mol)                | $\Delta E$ (kcal/mol) | Potential Energy (kj/mol)                                         | $\Delta E$ (kcal/mol) |
| <b>1</b>    | -8507636.185                             | 0.0                   | -5513159.817                                                      | 0.0                   |
| <b>TS12</b> | -8507546.797                             | 21.4                  | -5513052.974                                                      | 25.6                  |

|              |              |       |              |       |
|--------------|--------------|-------|--------------|-------|
| <b>2</b>     | -8507578.981 | 13.7  | -5513105.02  | 13.1  |
| <b>TS23a</b> | -8507562.07  | 17.7  | -5513062.946 | 23.2  |
| <b>TS23b</b> | -8507481.087 | 37.1  | -5513011.838 | 35.4  |
| <b>TS23c</b> | -8507535.304 | 24.1  | -5513032.459 | 30.5  |
| <b>3a</b>    | -8507626.688 | 2.3   | -5513123.054 | 8.8   |
| <b>3b</b>    | -8507625.893 | 2.5   | -5513120.402 | 9.4   |
| <b>3c</b>    | -8507581.647 | 13    | -5513073.082 | 20.8  |
| <b>TS34a</b> | -8507599.562 | 8.8   | -5513109.083 | 12.1  |
| <b>TS34b</b> | -8507568.819 | 16.1  | -5513081.985 | 18.6  |
| <b>TS34c</b> | -8507553.601 | 19.8  | -5513043.887 | 27.7  |
| <b>4a</b>    | -8507632.072 | 0.9   | -5513135.464 | 5.8   |
| <b>4b</b>    | -8507663.906 | -6.6  | -5513192.646 | -7.8  |
| <b>4c</b>    | -8507686.038 | -11.9 | -5513171.03  | -2.7  |
| <b>TS45a</b> | -8507601.975 | 8.2   | -5513106.38  | 12.8  |
| <b>TS45b</b> | -8507565.748 | 16.9  | -5513076.34  | 20    |
| <b>TS45c</b> | -8507673.03  | -8.8  | -5513157.95  | 0.4   |
| <b>5a</b>    | -8507888.084 | -60.3 | -5513381.757 | -53.1 |
| <b>5b</b>    | -8507847.246 | -50.5 | -5513352.403 | -46.1 |
| <b>5c</b>    | -8507713.649 | -18.5 | -5513196.895 | -8.9  |
| <b>TS56c</b> | -8507631.394 | 1.1   | -5513115.395 | 10.6  |
| <b>6c</b>    | -8507752.259 | -27.8 | -5513251.314 | -21.9 |

**Table S2.** Imaginary frequencies for the transition state structures for the oxidative cleavage of aromatic C–C bond of GTQ substrate catalyzed by GDO enzyme at the B3LYP/6-31+G(d)/OPLS level of theory on the quintet respectively.

| <b>Structure</b> | <b>Frequency (cm<sup>-1</sup>)</b> |
|------------------|------------------------------------|
| TS12             | -329.4                             |
| TS23a            | -220.2                             |
| TS23b            | -390.9                             |
| TS23c            | -392.9                             |
| TS34a            | -683.6                             |
| TS34b            | -752.1                             |
| TS34c            | -183.6                             |
| TS45a            | -691.4                             |
| TS45b            | -858.7                             |
| TS45c            | -465.0                             |
| TS56c            | -467.1                             |

### Snapshot Pictures of all Optimized Structures of all Stationary States

All stationary and transition state structures for all three pathways (A, B C) were optimized in B3LYP/6-31+G(d)(C,H,N,O),LANL2DZ(Fe)/OPLS level of theory and the optimized

structures of all stationary states in quintet surface are provided below with key inter atomic distances.

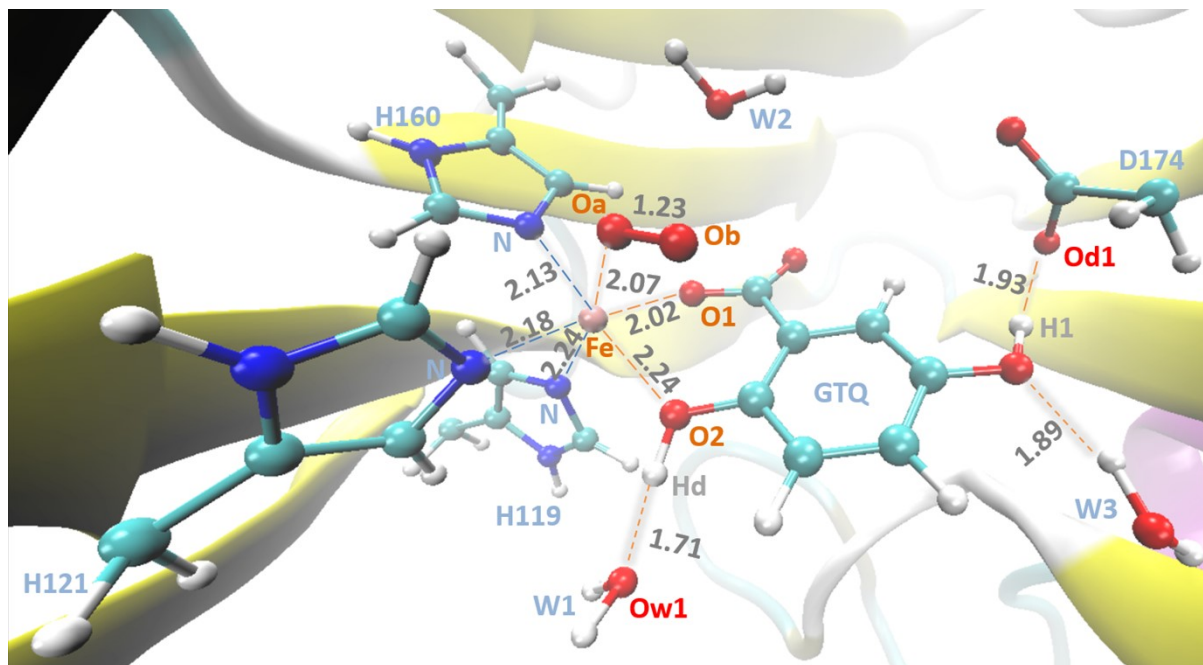

**Figure S14.** Optimized structure of 1 in quintet spin state with key inter atomic distances (Å).

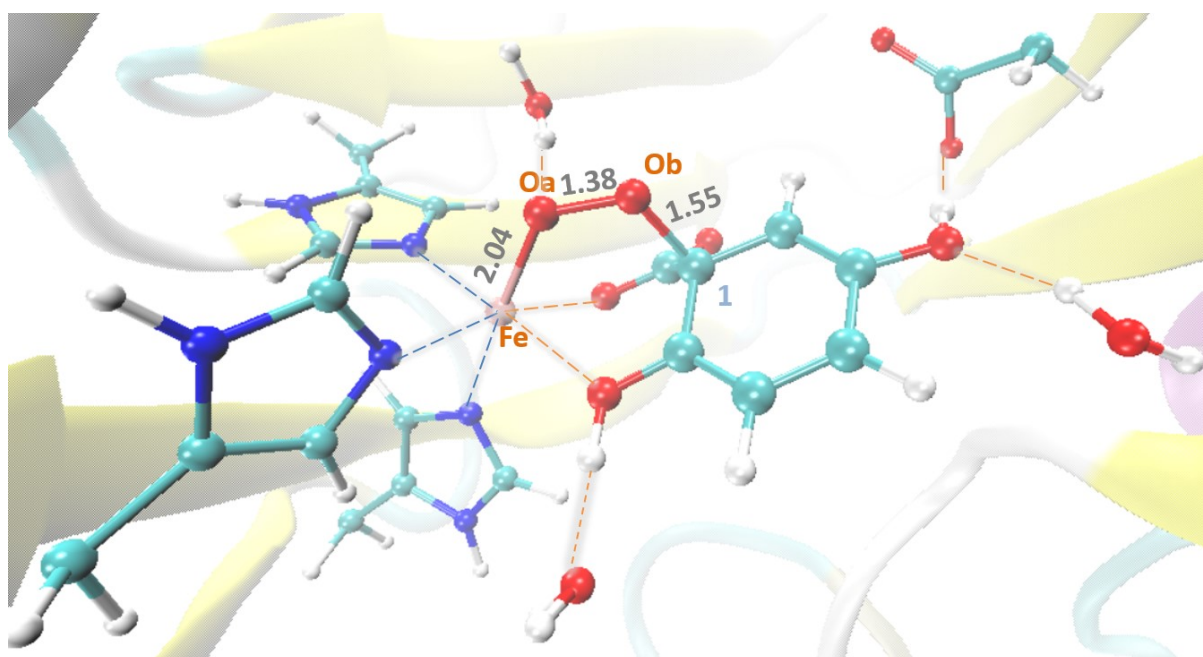

**Figure S15.** Optimized structure of 2 in quintet spin state with key interatomic distances (Å).

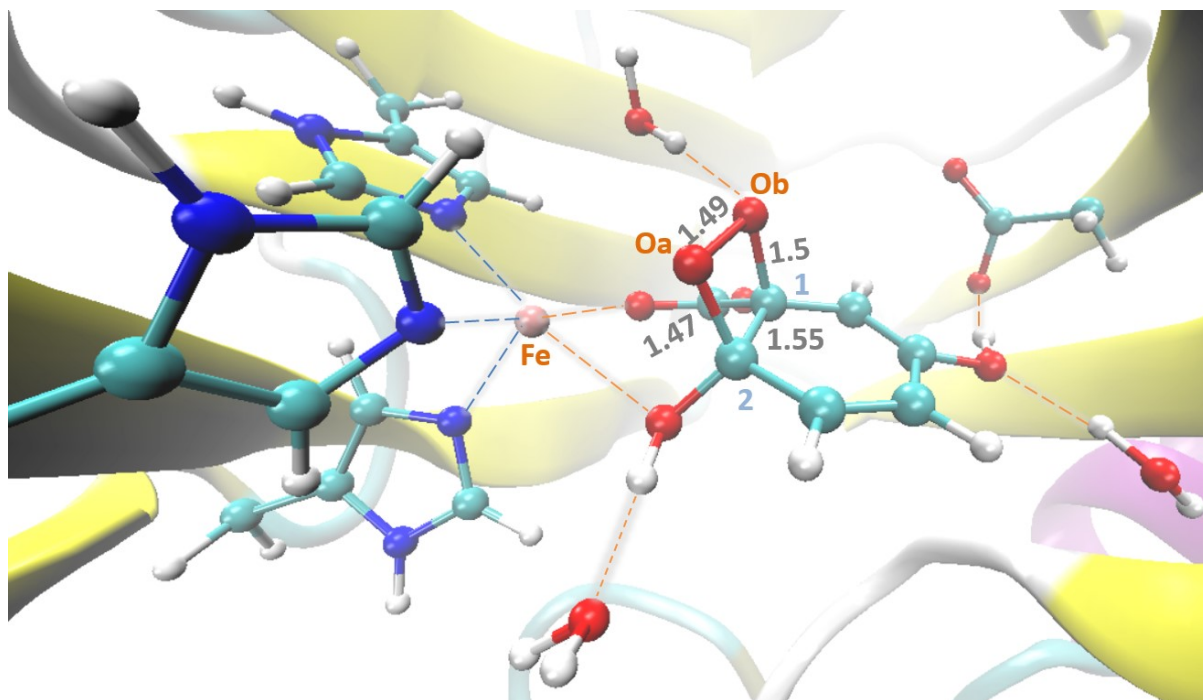

**Figure S16.** Optimized structure of 3a in quintet spin state with key interatomic distances (Å).

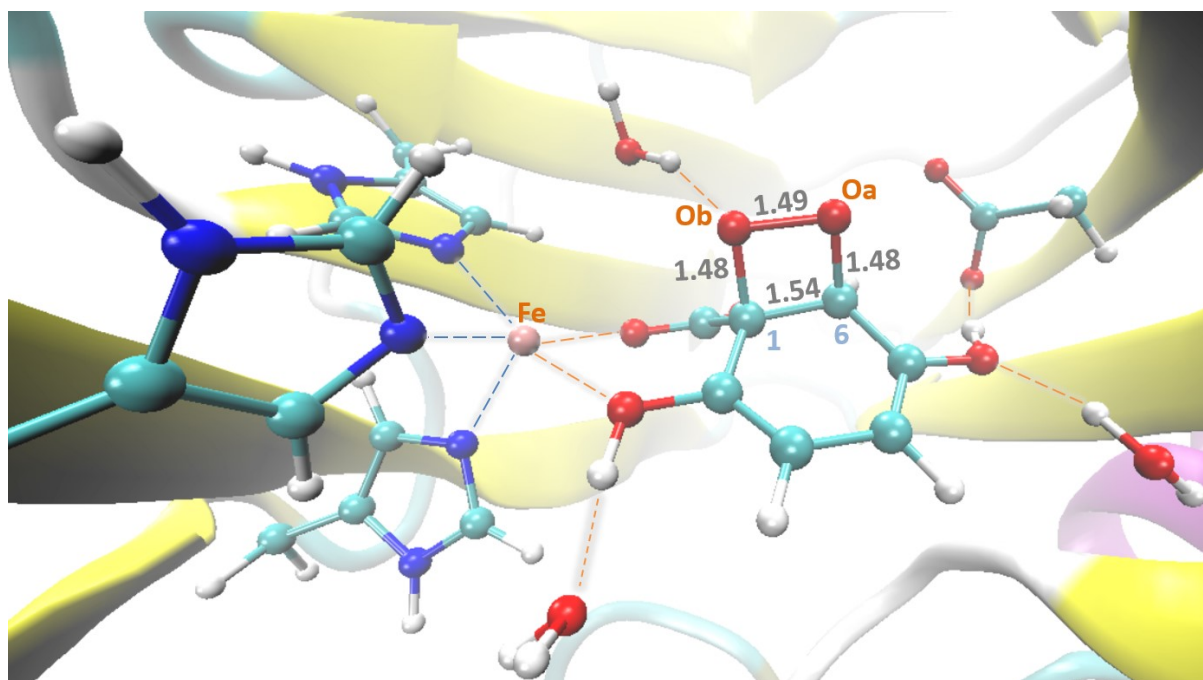

**Figure S17.** Optimized structure of 3b in quintet spin state with key interatomic distances (Å).

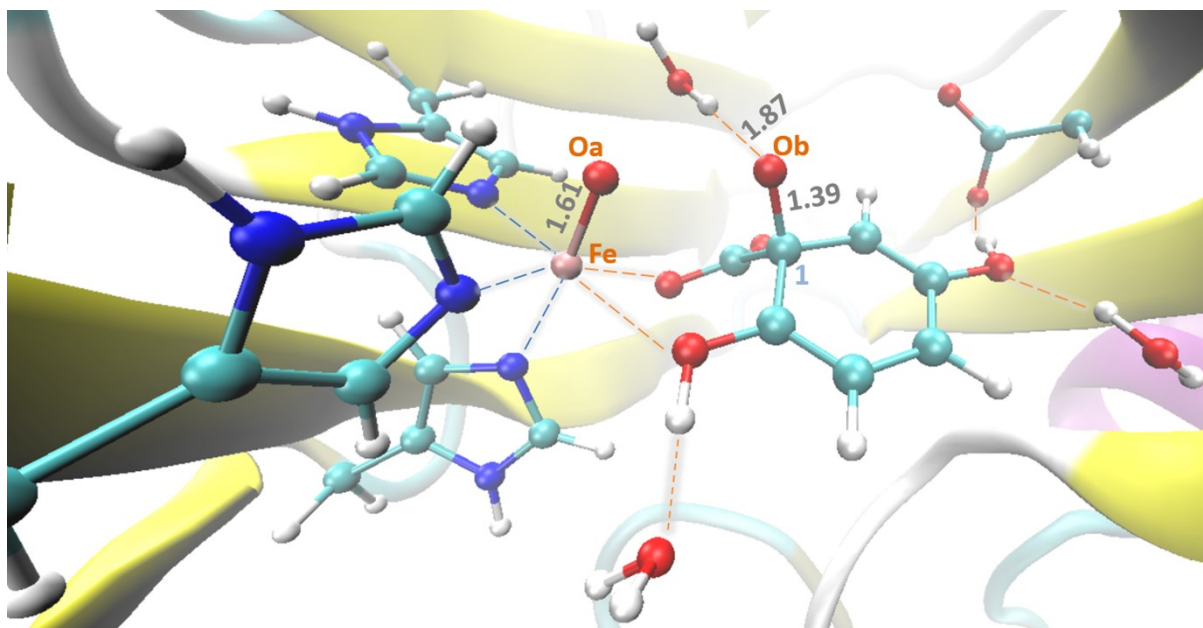

**Figure S18.** Optimized structure of 3c in quintet spin state with key interatomic distances (Å).

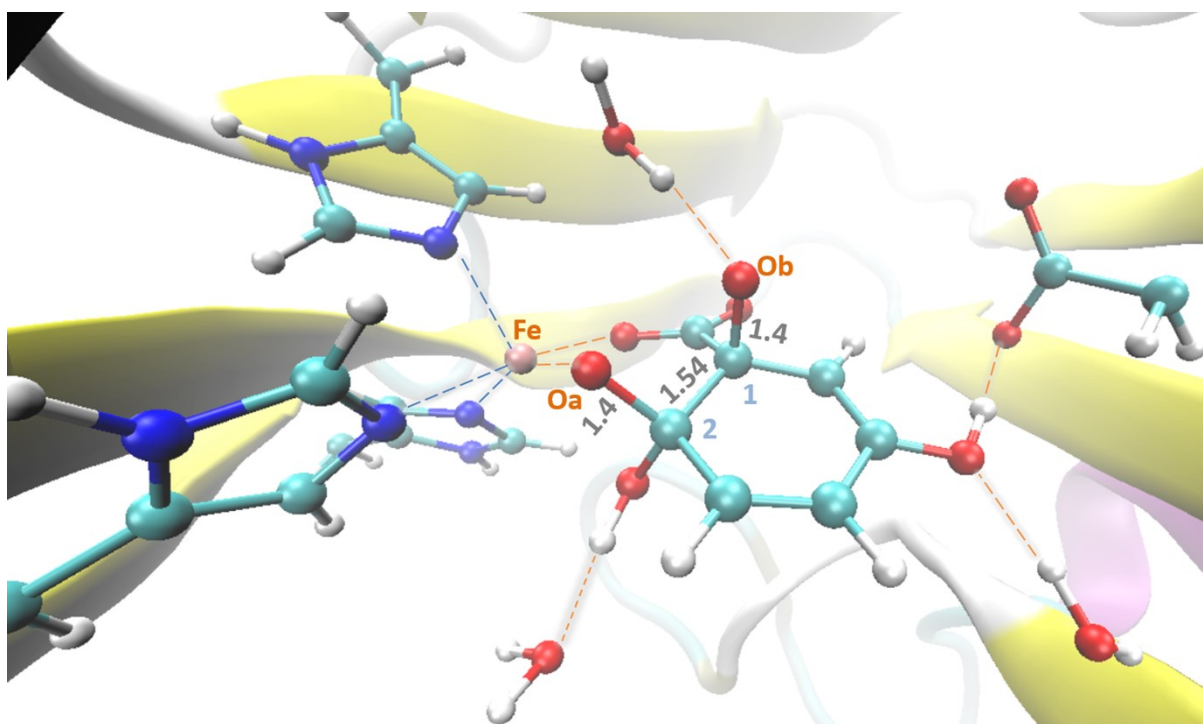

**Figure S19.** Optimized structure of 4a in quintet spin state with key interatomic distances (Å).

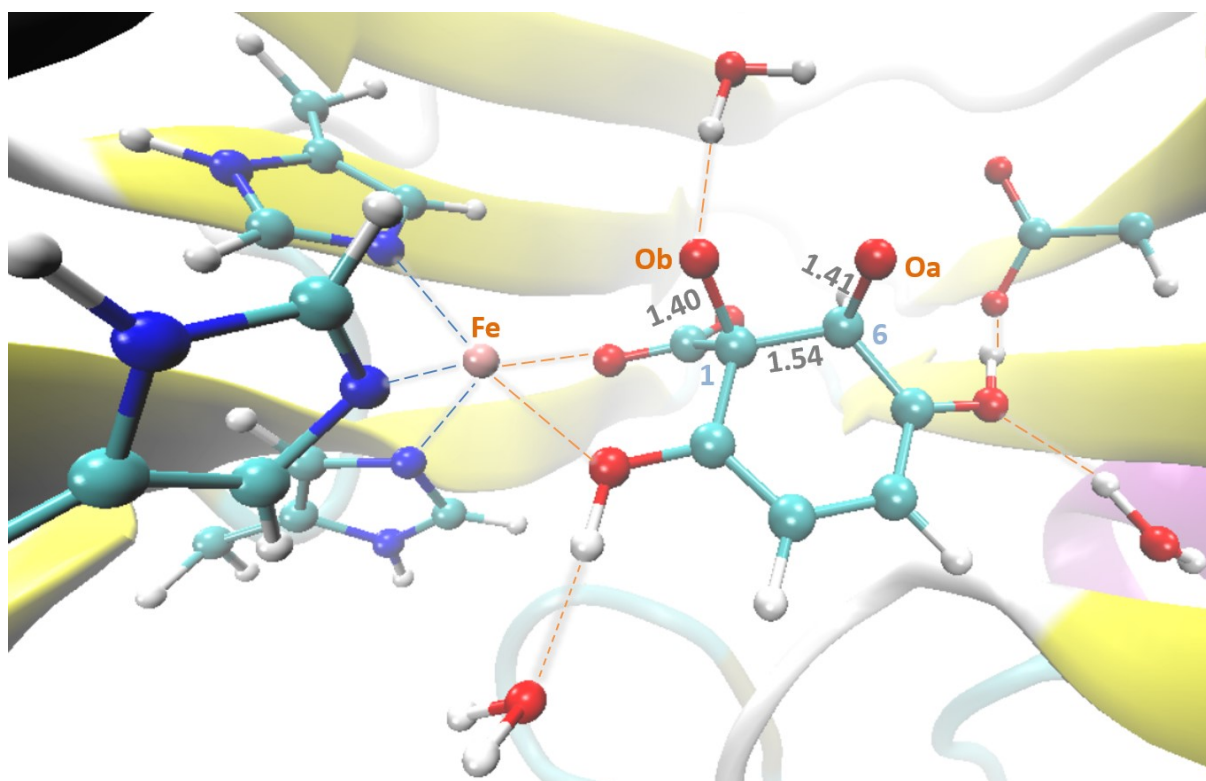

**Figure S20.** Optimized structure of 4b in quintet spin state with key interatomic distances (Å).

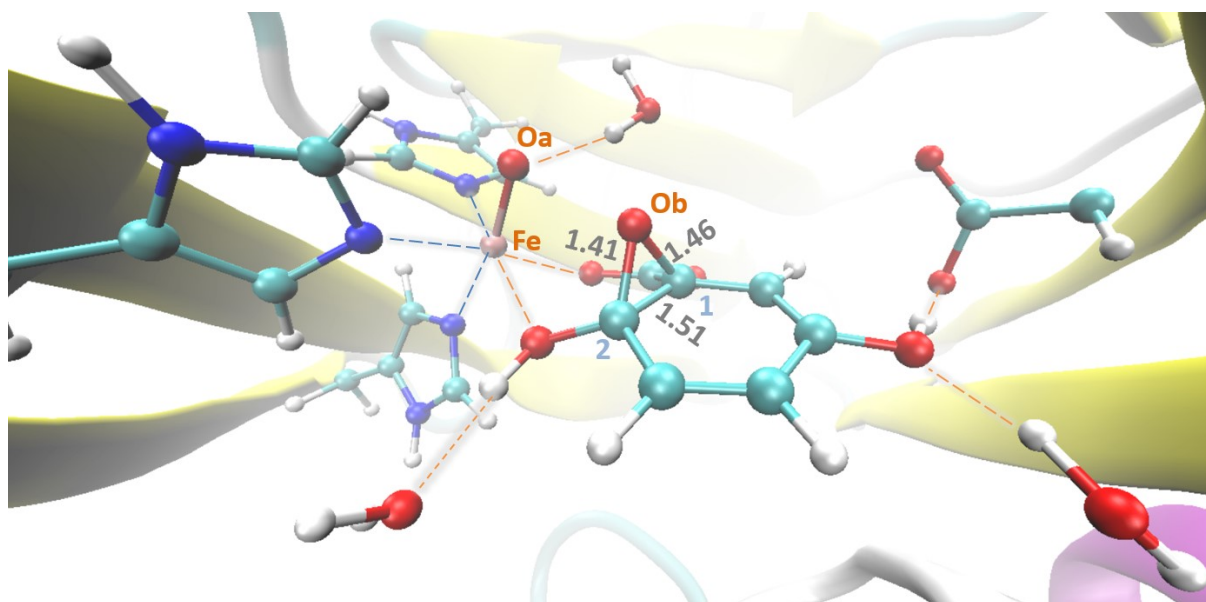

**Figure S21.** Optimized structure of 4c in quintet spin state with key interatomic distances (Å).

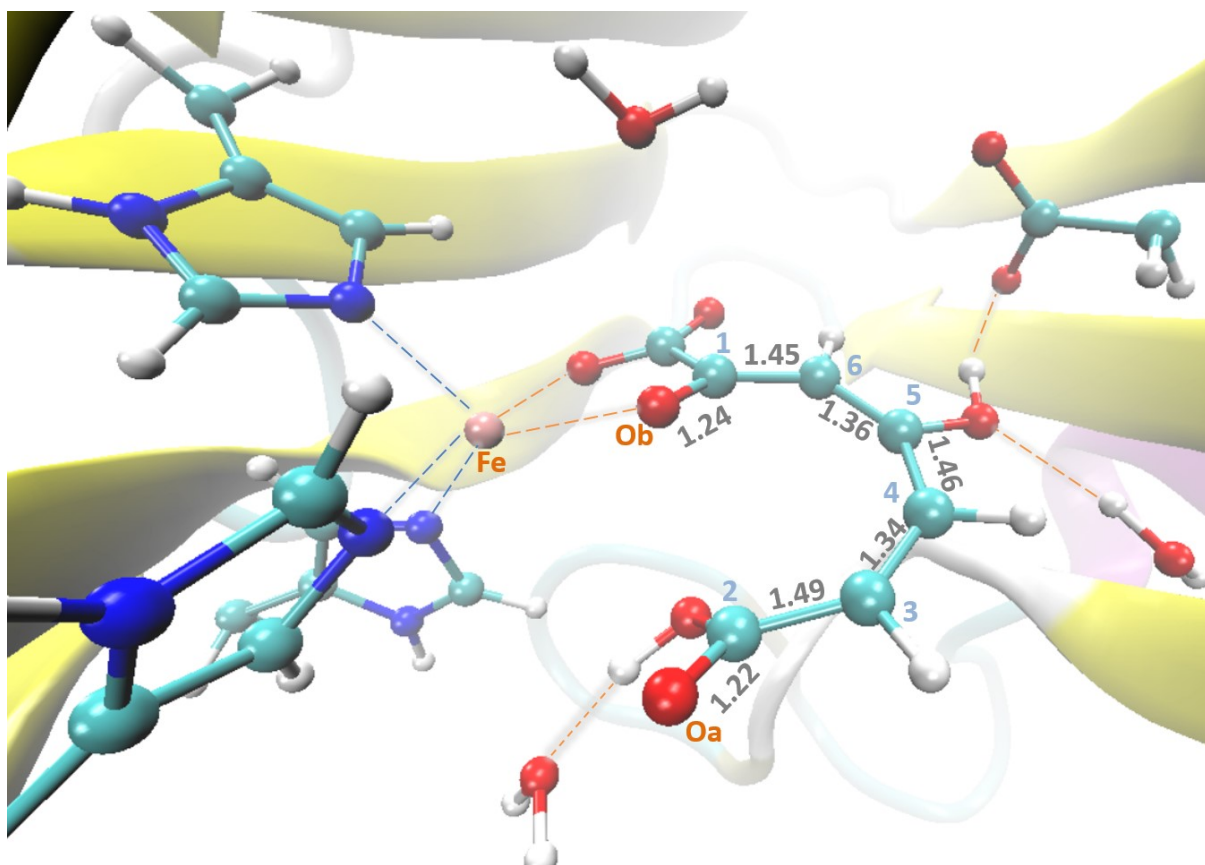

**Figure S22.** Optimized structure of 5a in quintet spin state with key interatomic distances (Å).

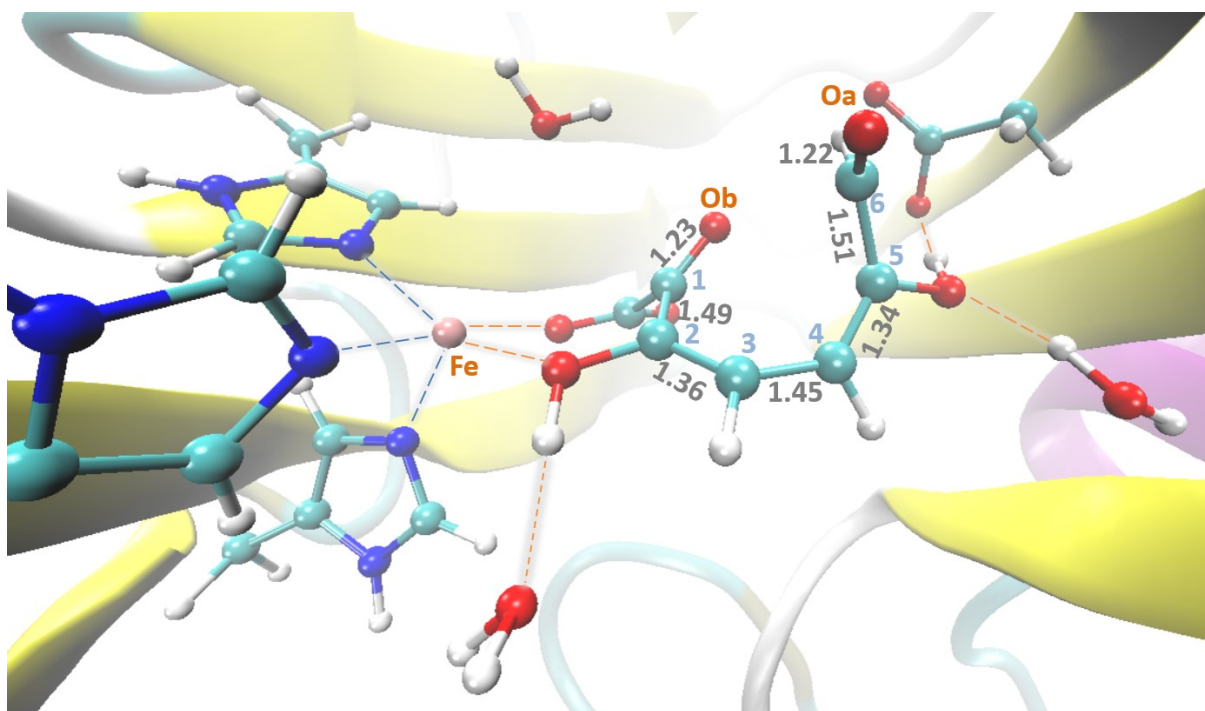



**Figure S23.** Optimized structure of 5b in quintet spin state with key interatomic distances (Å).

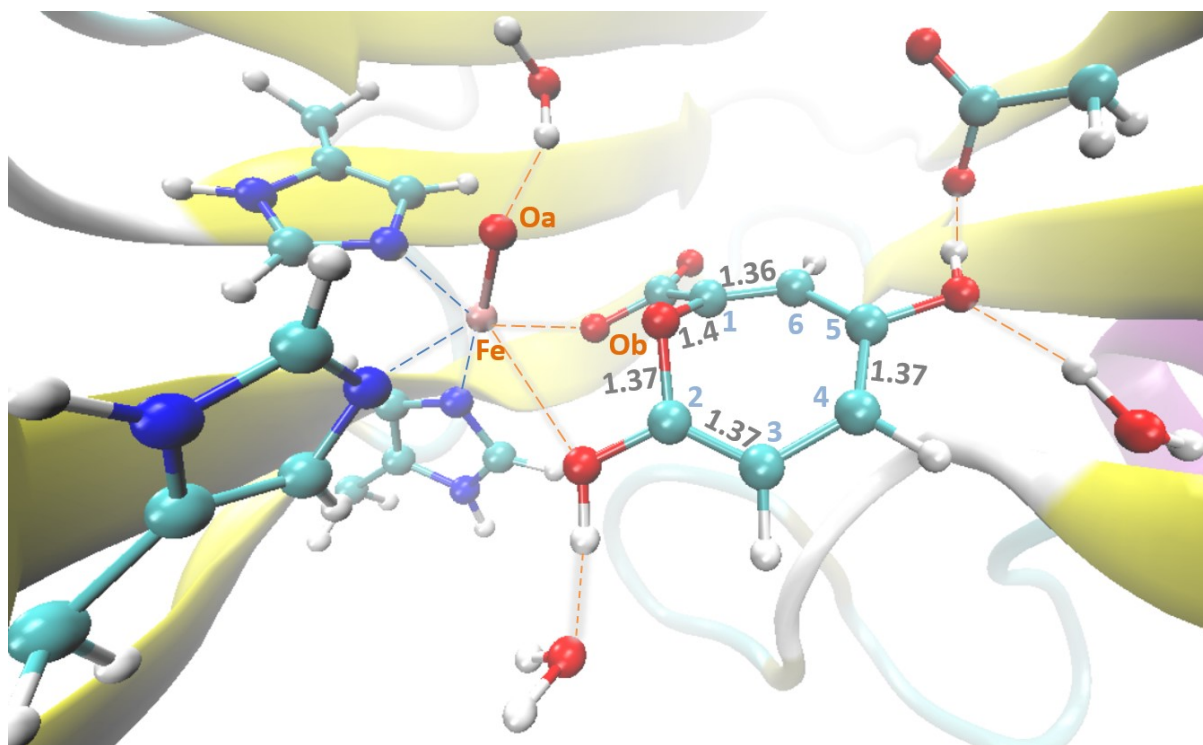

**Figure S24.** Optimized structure of 5c in quintet spin state with key interatomic distances (Å).

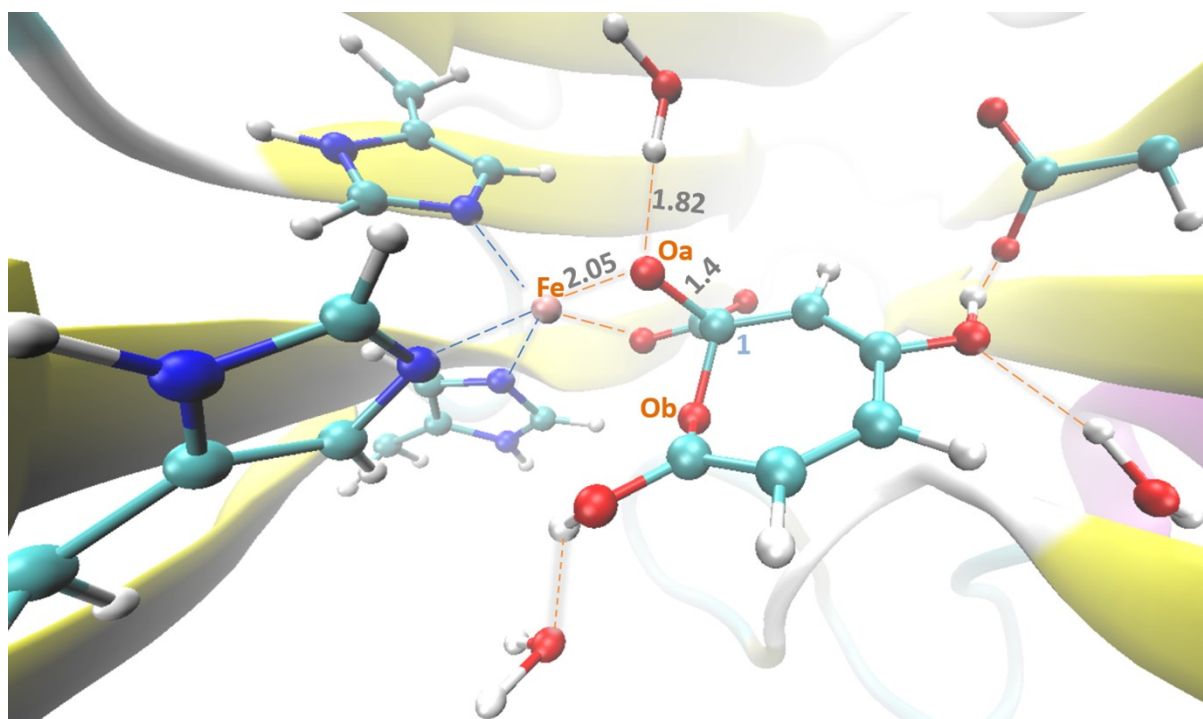

**Figure S25.** Optimized structure of 6c in quintet spin state with key interatomic distances (Å).

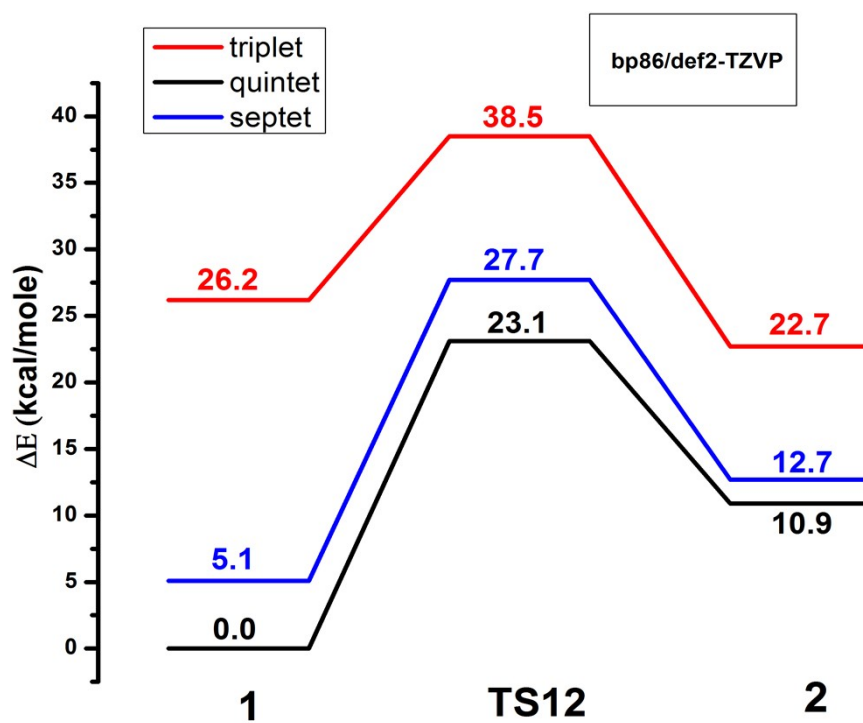

**Figure S26:** The potential energy profiles for the formation of alkylperoxy intermediate in the active site of the GDO enzyme on the quintet (black), triplet (red) and septet (blue) spin states at the BP86/def2-TZVP/OPLS level of theory.

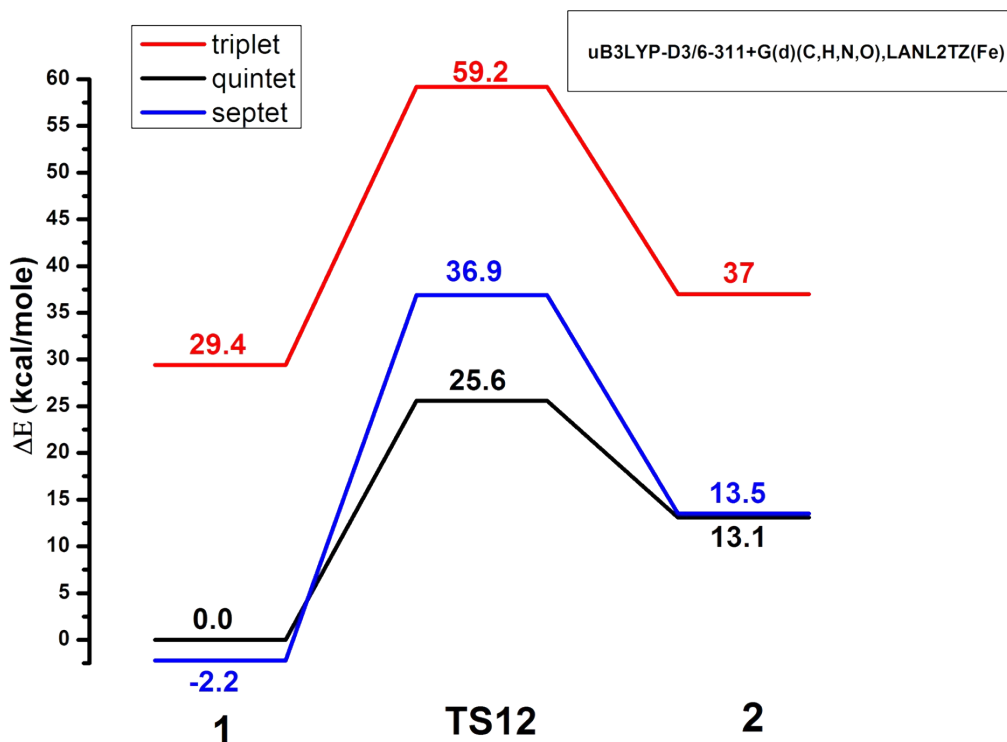

**Figure S27:** The potential energy profiles for the formation of alkylperoxy intermediate in the active site of the GDO enzyme on the quintet (black), triplet (red) and septet (blue) spin states at the uB3LYP-D3/6-311+G(d)(C,H,N,O)Lanl2TZ(Fe)/OPLS level of theory.

We have also performed single-point calculation in the ORCA programme using the QM part of intermediate 1 of our system in uB3LYP-D3/def2-TZVP level of theory. We used CPCM solvation model with  $\epsilon = 4.0$  to mimic the enzyme environment. The obtained results show similar trends of spin state (quintet, septet, triplet) ordering. The septet spin state is more stabilised ( $\sim -1.7$  kcal/mol) and the triplet spin state is 21.8 kcal/mol uphill in energy compared to the quintet spin state. If we use Gaussian 16 in place of ORCA without changing the rest of the conditions then also we will observe the same trend of stabilised septet spin state ( $\sim -1.6$  kcal/mol) and highly destabilised triplet spin state ( $\sim 22.4$  kcal/mol) over quintet spin state of intermediate 1.

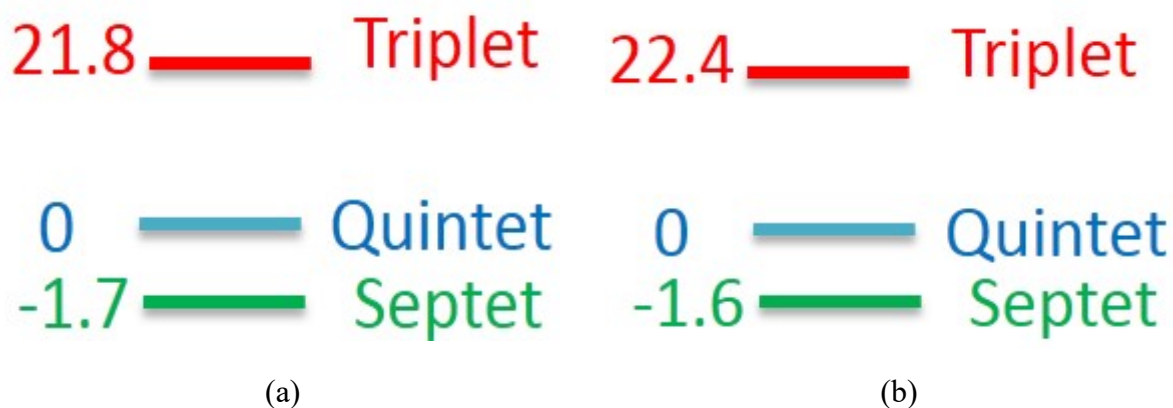



We have computed the energies of one transition state and two stationary state structures on the quintet spin surface, for the substrate without having the hydroxyl group at the 5-position (i.e. salicylate). Those stationary states and transition state structures are common for all the three pathways. The obtained energy barrier for the salicylate substrate is significantly larger (38.0 kcal/mol) compared to the gentisate substrate (21.4 kcal/mol) at the uB3LYP-D3/def2-TZVP/OPLS level of theory (Figure S30). In the salicylate-GDO enzyme system, the strong hydrogen bonding interaction between the 5-OH group and Asp174 residue is absent in their corresponding stationary and saddle points. This interaction is very important for the substrate to facilitate the reaction in the active site of the GDO enzyme.

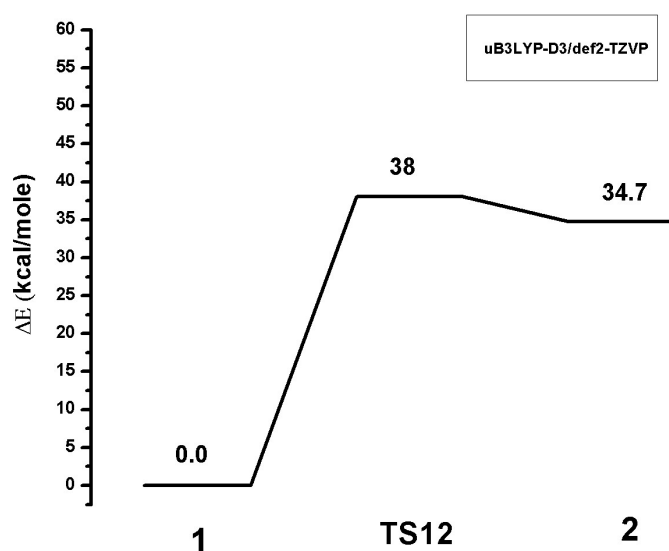

**Figure S30:** The potential energy profiles for the formation of alkylperoxy intermediate in the active site of the salicylate-GDO system on the quintet spin state at the uB3LYP-D3/def2-TZVP/OPLS level of theory.

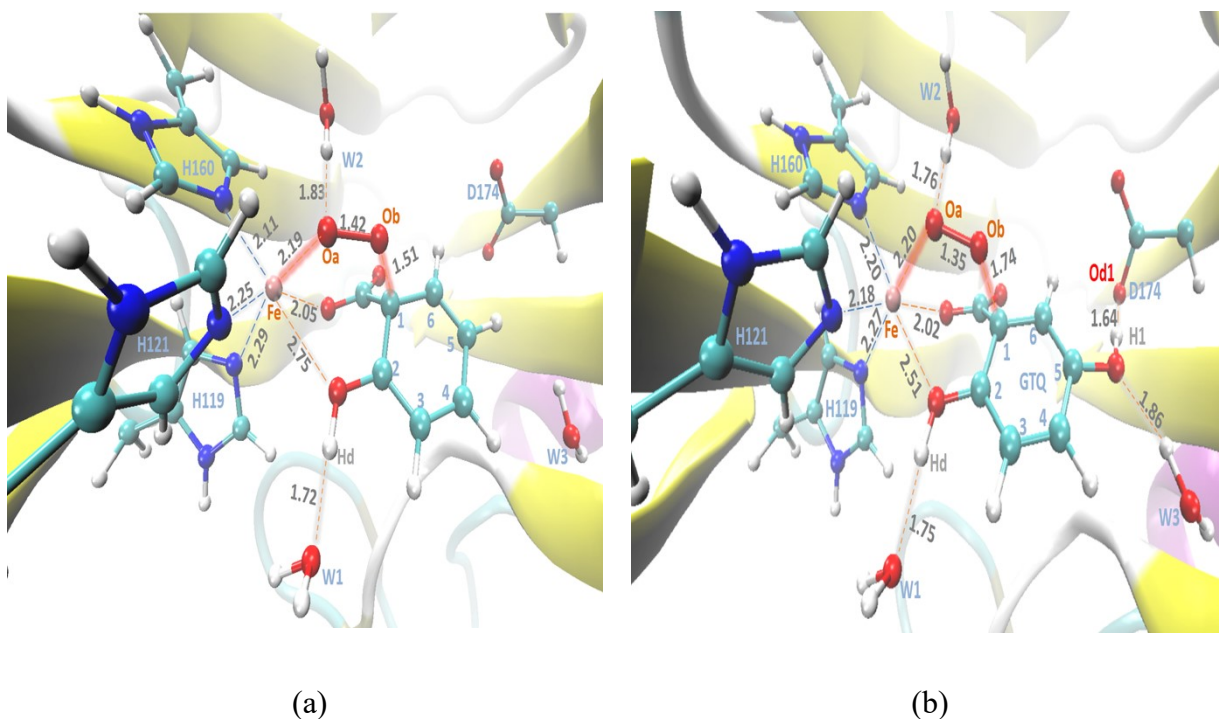

**Figure S31.** Optimized TS12 structures of the (a) Salicylate-GDO and (b) Gentisate-GDO systems, respectively. All the key distances are given in Å.

The QM/MM energy profile for the first three points (1, TS12, 2) of mutated GTQ-GDO(Asp174Ala) system has been carried out. The obtained barrier for the rate-determining step along the pathway A for GTQ-GDO (Asp174Ala) system is higher (32.1 kcal/mol) compared to the wild-type GTQ-GDO systems (21.4 kcal/mol) (Figure S32). In the mutated Asp174Ala system, the hydrogen bond between the para-hydroxyl group of the GTQ and the carboxylic group of ASP174 is absent.

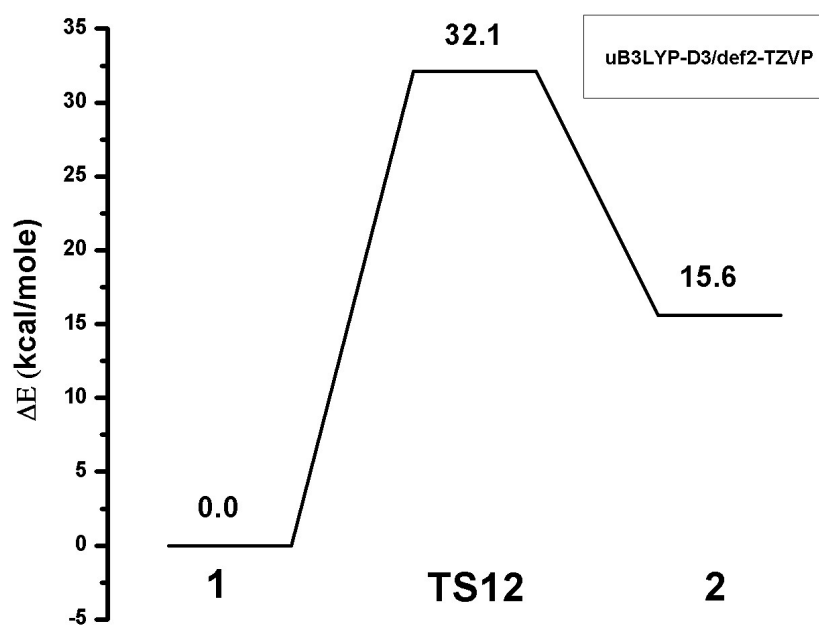

**Figure S32:** The potential energy profiles for the formation of alkylperoxy intermediate in the active site of the GDO (D174A) system on the quintet spin state at the uB3LYP-D3/def2-TZVP/OPLS level of theory.

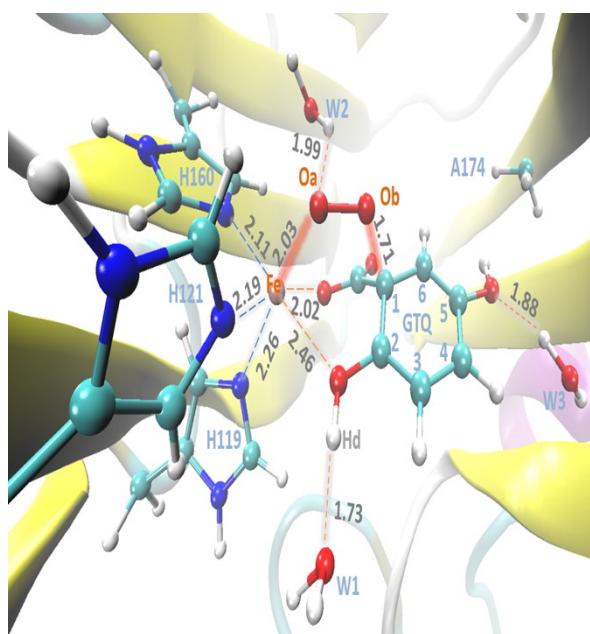

(a)

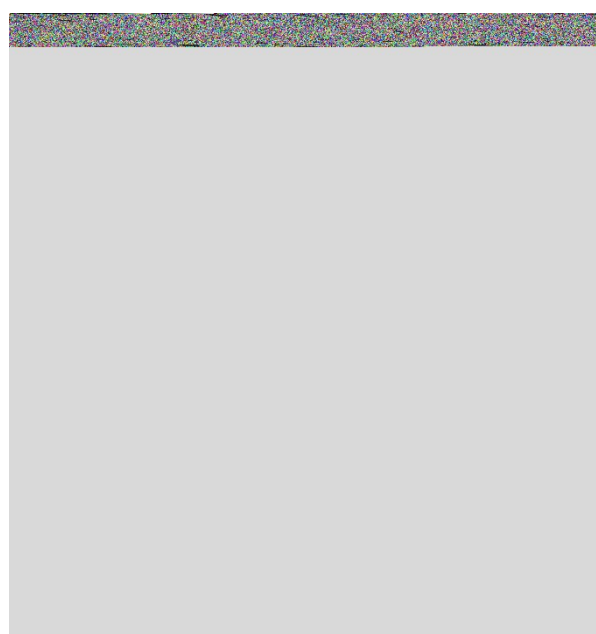

(b)

**Figure S33:** Optimized TS12 structures for the a) mutated GTQ-GDO (Asp174Ala) and b) wild-type GTQ-GDO system. All the key distances are given in Å

The QM/MM optimizations calculations of the GDO enzyme structure without having water molecules in the active sites have been performed. The calculations unearthed that the interatomic distance between the oxygen atom of the oxygen molecule and the catalytic iron center in this system is longer (3.13 Å) (Figure S34) compared to the system with the water model (2.07 Å) (Figure 1). This indicates that a system without water does not provide a proper oxygen-binding structure to initiate the reaction.

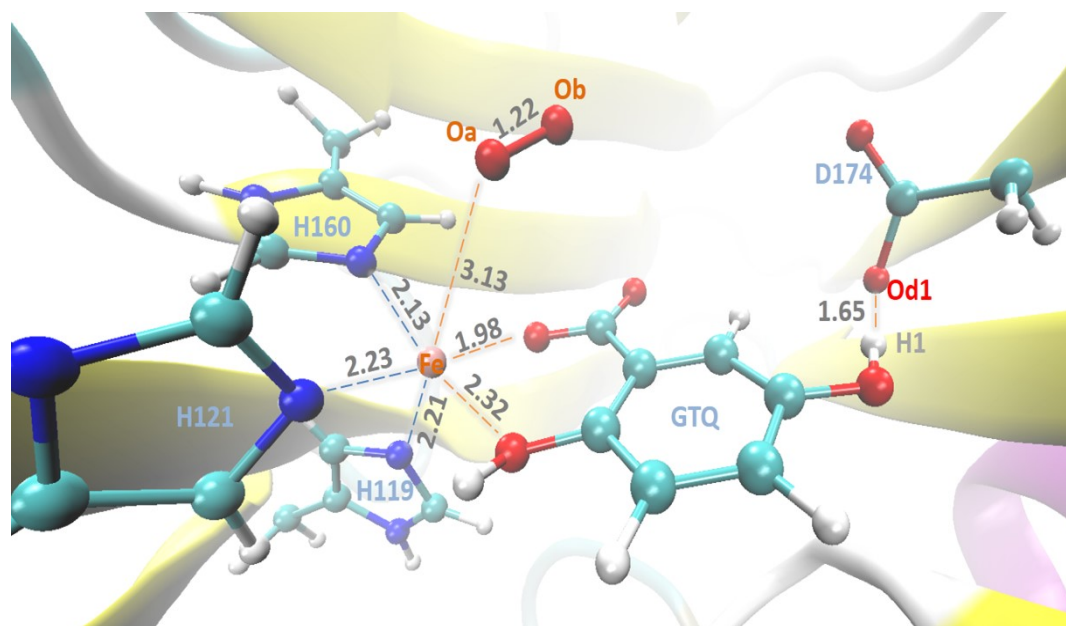

**Figure S34:** Optimized structure of the enzyme-substrate complex of the GTQ-GDO system without having active site water molecules. All the key distances are given in Å.

### Cartesian Coordinates for all Stationary Structures

Cartesian coordinates of QM region of all optimized stationary states for the degradation of 2,5-dihydroxybenzoate substrate catalyzed by GDO enzyme at the B3LYP/6-31+G(d)/OPLS level of theory on the quintet spin state are given below.

Structure of **1**

|   |               |               |               |
|---|---------------|---------------|---------------|
| C | 31.2772299166 | 62.7883537178 | 48.4100487636 |
| H | 30.6628664934 | 63.3403471641 | 47.6872006508 |
| H | 31.1263584663 | 61.7244216385 | 48.1723997084 |
| C | 32.7443559706 | 63.1123898231 | 48.1715993473 |
| N | 33.2397294744 | 63.2506319136 | 46.8766087854 |
| H | 32.7081252922 | 63.2034311328 | 46.0116206807 |
| C | 34.5840084432 | 63.4225363381 | 46.9362261559 |



|   |               |               |               |
|---|---------------|---------------|---------------|
| H | 35.2065741739 | 63.5578355377 | 46.0621995927 |
| N | 35.0051037886 | 63.3994034368 | 48.1938985662 |
| C | 33.8684469333 | 63.2138338416 | 48.9659194437 |
| H | 33.9457887426 | 63.1775842671 | 50.0431222142 |
| C | 35.5325617911 | 57.9435060712 | 49.5336098768 |
| H | 34.7075309510 | 58.1284646804 | 48.8407330535 |
| H | 36.1357877645 | 57.1366986229 | 49.0879456253 |
| C | 36.3335994733 | 59.2129506849 | 49.6078281161 |
| N | 37.4616201023 | 59.4237909327 | 50.3870666721 |
| H | 37.8190565514 | 58.8235831754 | 51.1315547923 |
| C | 37.8838289616 | 60.6897433311 | 50.1943175731 |
| H | 38.7292762901 | 61.1051765124 | 50.7173657534 |
| N | 37.1002219021 | 61.3210914761 | 49.3266499155 |
| C | 36.1367930723 | 60.4003028717 | 48.9510687791 |
| H | 35.3644109394 | 60.6470260337 | 48.2393728088 |
| C | 35.1222198862 | 66.1716374760 | 53.7012670672 |
| H | 35.2597824574 | 65.8109306482 | 54.7278122845 |
| H | 35.7162920573 | 67.0877232586 | 53.6034530148 |
| C | 35.6086243734 | 65.1565181871 | 52.7129631913 |
| N | 35.3968647808 | 63.7994488188 | 52.8837473326 |
| H | 34.9179356157 | 63.3416887011 | 53.6647322534 |
| C | 35.8591094996 | 63.1541004174 | 51.7962029564 |
| H | 35.8282705904 | 62.0839740046 | 51.6704093097 |
| N | 36.3635337424 | 64.0185102372 | 50.9256707131 |
| C | 36.2135555466 | 65.2749138932 | 51.4845014130 |
| H | 36.4947850770 | 66.1631510476 | 50.9356301733 |
| C | 45.0510992831 | 66.6628098507 | 46.5628350039 |
| H | 44.6947887706 | 65.6497322033 | 46.7994722915 |
| H | 45.1361444558 | 66.7276976240 | 45.4758614082 |
| C | 43.8764407421 | 67.5575240861 | 47.0074387372 |

|    |               |               |               |
|----|---------------|---------------|---------------|
| O  | 43.4948322726 | 67.5868040345 | 48.2064466801 |
| O  | 43.2442911900 | 68.1387309948 | 46.0614873197 |
| Fe | 37.0954765552 | 63.4785298079 | 48.9992892425 |
| O  | 40.0104296845 | 63.2034262218 | 49.3443473420 |
| O  | 38.9364980257 | 63.3298803526 | 49.9370566726 |
| H  | 37.8254164093 | 62.2318701257 | 46.4845185367 |
| O  | 38.0426998756 | 63.0481261916 | 47.0189979055 |
| C  | 39.2220367658 | 63.6461928336 | 46.6228922589 |
| C  | 40.1382852845 | 62.9254516439 | 45.8425357378 |
| C  | 39.5049581970 | 64.9781621906 | 46.9897343087 |
| H  | 39.9274217767 | 61.8884911207 | 45.6007784777 |
| C  | 41.2973868766 | 63.5261532865 | 45.3537210991 |
| C  | 38.6164304416 | 65.8726562346 | 47.8442150508 |
| C  | 40.6924354904 | 65.5432631134 | 46.5139307653 |
| H  | 41.9872397001 | 62.9742498115 | 44.7243792809 |
| C  | 41.5538027852 | 64.8646549925 | 45.6632583430 |
| O  | 38.9142314138 | 67.0878914537 | 47.9063403385 |
| O  | 37.6068434121 | 65.3470457039 | 48.4239099581 |
| H  | 40.9069035109 | 66.5706711150 | 46.7850735106 |
| O  | 42.6409903080 | 65.4811763907 | 45.0852697969 |
| H  | 42.7064583827 | 66.4315550187 | 45.3470239514 |
| O  | 40.0288990157 | 65.7360550124 | 50.8908523670 |
| H  | 40.9363614601 | 66.0426445850 | 50.7013444641 |
| H  | 40.0935475029 | 65.2898220776 | 51.7689180509 |
| O  | 37.2169764011 | 61.0532171208 | 45.4106117127 |
| H  | 36.2365508790 | 61.0257749512 | 45.2740227794 |
| H  | 37.4922122991 | 60.0928323238 | 45.4835704359 |
| O  | 43.9462760184 | 63.7019805243 | 43.2882732782 |
| H  | 43.6553084321 | 64.4059051053 | 43.9050670253 |
| H  | 44.1630862728 | 64.1308594399 | 42.4343610539 |

|   |               |               |               |
|---|---------------|---------------|---------------|
| H | 45.9647762500 | 66.7899571335 | 46.9488764118 |
| H | 34.1523237312 | 66.3914837663 | 53.5965338008 |
| H | 35.1305977400 | 57.6419927661 | 50.3981991599 |
| H | 30.8814214954 | 62.9726059099 | 49.3097080454 |

Structure of **TS12**

|   |               |               |               |
|---|---------------|---------------|---------------|
| C | 31.1139142265 | 62.9711538554 | 48.4877546654 |
| H | 30.4937227546 | 63.5443572816 | 47.7853902706 |
| H | 30.9612786922 | 61.9131781525 | 48.2286034668 |
| C | 32.5776887322 | 63.2934738144 | 48.2467559530 |
| N | 33.1043271570 | 63.1835929993 | 46.9641568821 |
| H | 32.5903964668 | 62.9607385927 | 46.1189779536 |
| C | 34.4418993219 | 63.4029434308 | 47.0192289263 |
| H | 35.0852864556 | 63.3733992176 | 46.1510480558 |
| N | 34.8268227591 | 63.6483645406 | 48.2609522698 |
| C | 33.6719268905 | 63.5989901601 | 49.0288889398 |
| H | 33.7110426879 | 63.7900245584 | 50.0905466840 |
| C | 35.2933332757 | 58.1041015761 | 49.5319080474 |
| H | 34.4362436851 | 58.3127244928 | 48.8843266273 |
| H | 35.8618201061 | 57.2969450770 | 49.0482135378 |
| C | 36.1178742650 | 59.3636708029 | 49.5743618026 |
| N | 37.3466293268 | 59.5266863697 | 50.2015270463 |
| H | 37.7715096289 | 58.8928477132 | 50.8757179022 |
| C | 37.7746956733 | 60.7938285140 | 49.9939209019 |
| H | 38.6891353652 | 61.1999779744 | 50.4016139836 |
| N | 36.8992992129 | 61.4642383681 | 49.2550987678 |
| C | 35.8678601416 | 60.5783081501 | 48.9879860711 |
| H | 35.0123440116 | 60.8672444009 | 48.3961550714 |
| C | 34.8669452515 | 66.0248697580 | 53.8845993166 |
| H | 34.9672524001 | 65.5777579725 | 54.8819505578 |

|    |               |               |               |
|----|---------------|---------------|---------------|
| H  | 35.4975677556 | 66.9225729661 | 53.8832191312 |
| C  | 35.3970601444 | 65.0748623382 | 52.8396807973 |
| N  | 35.1375320213 | 63.7165471035 | 52.8741631394 |
| H  | 34.5914103462 | 63.2259521599 | 53.5893465086 |
| C  | 35.6992895258 | 63.1414421476 | 51.7889134479 |
| H  | 35.6560102626 | 62.0836024915 | 51.5827872955 |
| N  | 36.3067380332 | 64.0511328133 | 51.0376106632 |
| C  | 36.1327687157 | 65.2617532634 | 51.6908766275 |
| H  | 36.5256949085 | 66.1788507078 | 51.2778218688 |
| C  | 45.5241988489 | 67.6373952585 | 46.0676911116 |
| H  | 45.5489772027 | 67.0903520920 | 45.1185416199 |
| H  | 45.5976596474 | 68.6963081168 | 45.7746284670 |
| C  | 44.1028425905 | 67.5322245774 | 46.6473266441 |
| O  | 43.8641414305 | 67.4335504259 | 47.8700870764 |
| O  | 43.1788484318 | 67.6423875388 | 45.7494016361 |
| Fe | 36.9784845312 | 63.6224771433 | 48.9873378465 |
| O  | 40.1440121453 | 63.7177597302 | 48.6087842615 |
| O  | 39.1231967157 | 63.4969557947 | 49.4636944525 |
| H  | 37.8854774230 | 62.0237932304 | 46.4213644795 |
| O  | 38.1053803236 | 62.8896281966 | 46.8691970816 |
| C  | 39.2861273720 | 63.3794114461 | 46.5188194071 |
| C  | 40.1113401040 | 62.7056626798 | 45.5839578486 |
| C  | 39.7431840265 | 64.6078088550 | 47.1708388766 |
| H  | 39.7800451871 | 61.7595178744 | 45.1691005007 |
| C  | 41.2821438379 | 63.2814333522 | 45.1636060723 |
| C  | 38.7239964094 | 65.6961122345 | 47.6225215926 |
| C  | 40.9969630218 | 65.1561012703 | 46.6767725601 |
| H  | 41.9012634579 | 62.8016360064 | 44.4110980412 |
| C  | 41.7071230651 | 64.5535824901 | 45.6828397993 |
| O  | 39.0794574981 | 66.8852775871 | 47.5111848546 |

|   |               |               |               |
|---|---------------|---------------|---------------|
| O | 37.6000583425 | 65.2972568516 | 48.0524173658 |
| H | 41.3200803441 | 66.1079188045 | 47.0779000578 |
| O | 42.7994616750 | 65.1018691048 | 45.0873705527 |
| H | 42.9162879389 | 66.0691489672 | 45.3466805880 |
| O | 39.4915456190 | 65.5873169869 | 51.1931144070 |
| H | 39.3173939907 | 64.8285788146 | 50.5967603910 |
| H | 39.8616528778 | 65.2107737332 | 52.0294283121 |
| O | 37.2417480962 | 60.7601023143 | 45.3923958805 |
| H | 36.2422712253 | 60.7026632535 | 45.4283488434 |
| H | 37.5489517482 | 59.8192519898 | 45.6063215573 |
| O | 43.9792528277 | 63.6182979953 | 43.0091151899 |
| H | 43.7105357432 | 64.2602908217 | 43.6990605392 |
| H | 44.2688567820 | 64.1185150440 | 42.2183913661 |
| H | 46.3267592158 | 67.4096867653 | 46.6190945026 |
| H | 33.9096440455 | 66.2928852270 | 53.7762383025 |
| H | 34.9256616567 | 57.7842355709 | 50.4051224078 |
| H | 30.7286321044 | 63.1334582302 | 49.3961681045 |

## Structure of 2

|   |             |             |             |
|---|-------------|-------------|-------------|
| C | 31.30831200 | 62.87233400 | 48.40879700 |
| H | 30.69819600 | 63.42682400 | 47.68394700 |
| H | 31.17702100 | 61.80941600 | 48.15724300 |
| C | 32.77334300 | 63.21852900 | 48.19458100 |
| N | 33.29532000 | 63.24496000 | 46.90571800 |
| H | 32.78246700 | 63.11531700 | 46.03928700 |
| C | 34.63313200 | 63.44738400 | 46.97595200 |
| H | 35.26954800 | 63.51454800 | 46.10575000 |
| N | 35.02649200 | 63.55416800 | 48.23480700 |
| C | 33.87398300 | 63.42846400 | 48.99901400 |
| H | 33.92122400 | 63.50669400 | 50.07353400 |

|    |             |             |             |
|----|-------------|-------------|-------------|
| C  | 35.55553600 | 58.08446800 | 49.54973100 |
| H  | 34.74160600 | 58.28829100 | 48.84769400 |
| H  | 36.16814800 | 57.29626800 | 49.08395500 |
| C  | 36.35887200 | 59.35538600 | 49.65705600 |
| N  | 37.55756800 | 59.53916800 | 50.33612700 |
| H  | 37.98645400 | 58.92161500 | 51.02694700 |
| C  | 37.97914500 | 60.80743200 | 50.12894700 |
| H  | 38.87987500 | 61.21736900 | 50.56115100 |
| N  | 37.12336600 | 61.46502500 | 49.35501800 |
| C  | 36.11655200 | 60.56334200 | 49.05421700 |
| H  | 35.28454200 | 60.83386900 | 48.42279300 |
| C  | 35.07111000 | 66.07432900 | 53.77106400 |
| H  | 35.18585000 | 65.66844800 | 54.78405600 |
| H  | 35.69753200 | 66.97356800 | 53.72389000 |
| C  | 35.57033700 | 65.08977000 | 52.75560100 |
| N  | 35.37758400 | 63.72335700 | 52.87374500 |
| H  | 34.89298700 | 63.23880100 | 53.63559200 |
| C  | 35.88667100 | 63.12104200 | 51.78369900 |
| H  | 35.88300200 | 62.05600600 | 51.62304600 |
| N  | 36.40410000 | 64.02443200 | 50.95756900 |
| C  | 36.21093600 | 65.25770800 | 51.55553600 |
| H  | 36.52995600 | 66.16918600 | 51.07684700 |
| C  | 45.23592100 | 66.80171000 | 46.25864100 |
| H  | 44.90338300 | 65.75390000 | 46.22679200 |
| H  | 45.39839800 | 67.10015200 | 45.21883100 |
| C  | 43.99551300 | 67.54409700 | 46.77803900 |
| O  | 43.67579700 | 67.56164100 | 47.99052500 |
| O  | 43.24805300 | 68.01831900 | 45.85140900 |
| Fe | 37.14844400 | 63.62130600 | 49.01401500 |
| O  | 40.18896100 | 64.00423600 | 48.72122500 |

|   |             |             |             |
|---|-------------|-------------|-------------|
| O | 39.13379200 | 63.54051900 | 49.47845400 |
| H | 37.83800300 | 62.15735000 | 46.38857000 |
| O | 38.09923500 | 62.97948800 | 46.91326500 |
| C | 39.30003700 | 63.48894100 | 46.56553700 |
| C | 40.07521600 | 62.91410800 | 45.56115900 |
| C | 39.78728400 | 64.65132300 | 47.37122700 |
| H | 39.72720600 | 62.00842100 | 45.07398900 |
| C | 41.23588000 | 63.53827900 | 45.12304500 |
| C | 38.73081200 | 65.76451000 | 47.72189100 |
| C | 41.04027300 | 65.24706200 | 46.84309000 |
| H | 41.81759400 | 63.13421500 | 44.30168300 |
| C | 41.65809100 | 64.76204100 | 45.73171400 |
| O | 39.06506800 | 66.95329600 | 47.59369200 |
| O | 37.59279800 | 65.35871000 | 48.12902500 |
| H | 41.39769500 | 66.14516000 | 47.33309500 |
| O | 42.69662000 | 65.39383500 | 45.09652900 |
| H | 42.77156600 | 66.35236600 | 45.34652500 |
| O | 39.09599500 | 65.72960300 | 51.28811100 |
| H | 39.15305300 | 65.03062900 | 50.61388300 |
| H | 39.60929300 | 65.36493200 | 52.05218400 |
| O | 37.22119100 | 61.02971700 | 45.34646900 |
| H | 36.23019000 | 61.00166400 | 45.27873000 |
| H | 37.49480300 | 60.06731500 | 45.48091100 |
| O | 43.94921400 | 63.69685400 | 43.19239900 |
| H | 43.69710300 | 64.39424400 | 43.83233900 |
| H | 44.20964800 | 64.13986900 | 42.35670100 |
| H | 46.10192100 | 66.87680800 | 46.75301400 |
| H | 34.11026200 | 66.32769400 | 53.65891800 |
| H | 35.13512200 | 57.74681500 | 50.39189700 |
| H | 30.89118400 | 63.03890500 | 49.30225000 |

## Structure of TS23a

|   |               |               |               |
|---|---------------|---------------|---------------|
| C | 31.2480067056 | 62.7974996808 | 48.4646624437 |
| H | 30.6107838650 | 63.3028452803 | 47.7293136973 |
| H | 31.1434607846 | 61.7243858872 | 48.2530946523 |
| C | 32.6943663064 | 63.1964440462 | 48.2358279032 |
| N | 33.0991525921 | 63.9989635264 | 47.1771980027 |
| H | 32.5115802513 | 64.4081570149 | 46.4579418916 |
| C | 34.4510457597 | 64.1339082905 | 47.2227117741 |
| H | 35.0173161601 | 64.7560697345 | 46.5453247329 |
| N | 34.9539451993 | 63.4609280732 | 48.2433324553 |
| C | 33.8710949064 | 62.8721252703 | 48.8702839465 |
| H | 34.0062350021 | 62.2648058047 | 49.7514918296 |
| C | 35.5067694183 | 57.9765462180 | 49.5657731365 |
| H | 34.6832057804 | 58.1709963590 | 48.8731300908 |
| H | 36.0945362580 | 57.1571826752 | 49.1248742074 |
| C | 36.3251839741 | 59.2380197844 | 49.6201557815 |
| N | 37.4665110490 | 59.4639245273 | 50.3786540897 |
| H | 37.8344706981 | 58.8747050382 | 51.1255592852 |
| C | 37.8928208143 | 60.7282861482 | 50.1438416087 |
| H | 38.7556872966 | 61.1727108655 | 50.6176164159 |
| N | 37.0991937011 | 61.3371770685 | 49.2732260142 |
| C | 36.1302433824 | 60.4096002842 | 48.9346424056 |
| H | 35.3525998229 | 60.6360745764 | 48.2211342922 |
| C | 34.9766468626 | 66.0373469367 | 53.7967124681 |
| H | 35.0881103459 | 65.6256316562 | 54.8074670579 |
| H | 35.6063445062 | 66.9335797150 | 53.7494156529 |
| C | 35.4596997038 | 65.0483674788 | 52.7729414106 |
| N | 35.2497180292 | 63.6842905320 | 52.8894974809 |



|    |               |               |               |
|----|---------------|---------------|---------------|
| H  | 34.7445037281 | 63.2050953467 | 53.6415664998 |
| C  | 35.7601074321 | 63.0774827864 | 51.8001621512 |
| H  | 35.7567089002 | 62.0103976684 | 51.6459244620 |
| N  | 36.2943678573 | 63.9718190371 | 50.9782572687 |
| C  | 36.1081298468 | 65.2064936727 | 51.5741292243 |
| H  | 36.4305031880 | 66.1146884604 | 51.0895930421 |
| C  | 45.3548814164 | 67.2000745546 | 45.9949183152 |
| H  | 45.1859309896 | 66.2664222351 | 45.4450585436 |
| H  | 45.5278975783 | 67.9506766685 | 45.2135842551 |
| C  | 43.9956812172 | 67.5881653060 | 46.5894715367 |
| O  | 43.7581313326 | 67.6864360889 | 47.8122419679 |
| O  | 43.0974511197 | 67.7927617963 | 45.6890816014 |
| Fe | 37.0677377375 | 63.5292843155 | 49.0538363929 |
| O  | 40.0812260138 | 64.1511135531 | 48.6674828557 |
| O  | 39.1156535334 | 63.0788838456 | 48.9321871294 |
| H  | 37.9193759013 | 62.1154082199 | 46.0093516563 |
| O  | 38.1306209970 | 63.0341667659 | 46.4516588509 |
| C  | 39.3807484011 | 63.3483209967 | 46.5889759713 |
| C  | 40.3993469151 | 62.6081852956 | 45.9254106420 |
| C  | 39.7704498708 | 64.6351139459 | 47.3372921783 |
| H  | 40.2034780545 | 61.5901958329 | 45.6061766866 |
| C  | 41.5439118494 | 63.2584475945 | 45.5606733793 |
| C  | 38.6118504635 | 65.7120533795 | 47.5112818528 |
| C  | 41.0072775637 | 65.2752906369 | 46.7892752970 |
| H  | 42.2954639830 | 62.7507254558 | 44.9611339832 |
| C  | 41.7832040937 | 64.6490645568 | 45.8819237580 |
| O  | 38.9153140509 | 66.9070068239 | 47.3067419539 |
| O  | 37.5105184026 | 65.2606049487 | 47.9206035660 |
| H  | 41.2425954578 | 66.2729070913 | 47.1347350186 |
| O  | 42.8279867133 | 65.2157807848 | 45.2136583195 |

|   |               |               |               |
|---|---------------|---------------|---------------|
| H | 42.8448639002 | 66.2156240751 | 45.3358889144 |
| O | 39.0133796265 | 65.3488402528 | 50.9446489830 |
| H | 39.5015376615 | 64.8670824403 | 50.2509401122 |
| H | 39.4048935981 | 65.0361987243 | 51.7945495235 |
| O | 37.3302683080 | 60.9385633858 | 45.2494930783 |
| H | 36.3262425277 | 60.9323900505 | 45.2877380987 |
| H | 37.6028992183 | 59.9964941771 | 45.5275643993 |
| O | 43.9425507298 | 63.6910599870 | 43.1740275800 |
| H | 43.6869920674 | 64.3616531000 | 43.8419886161 |
| H | 44.2135430273 | 64.1564327908 | 42.3550241446 |
| H | 46.1697388063 | 67.1311243077 | 46.5704644017 |
| H | 34.0173816193 | 66.3006007470 | 53.6942057641 |
| H | 35.0959714665 | 57.6794749120 | 50.4277439491 |
| H | 30.8575949171 | 62.9942995639 | 49.3640224613 |

Structure of **TS23b**

|   |             |             |             |
|---|-------------|-------------|-------------|
| C | 31.22147100 | 62.78932200 | 48.39462000 |
| H | 30.57209700 | 63.32014000 | 47.68671500 |
| H | 31.09955300 | 61.72003700 | 48.17200800 |
| C | 32.66607100 | 63.15662600 | 48.12959900 |
| N | 33.15792500 | 63.16673000 | 46.83047300 |
| H | 32.62593500 | 63.01560300 | 45.97956500 |
| C | 34.49369900 | 63.38532200 | 46.86769600 |
| H | 35.11233600 | 63.43269700 | 45.98389000 |
| N | 34.90921200 | 63.52008300 | 48.11781700 |
| C | 33.77687400 | 63.39780200 | 48.90787900 |
| H | 33.84982400 | 63.50152100 | 49.97954200 |
| C | 35.60237700 | 58.04780000 | 49.56368200 |
| H | 34.78979300 | 58.23584500 | 48.85548100 |
| H | 36.23042600 | 57.26867100 | 49.10394400 |
| C | 36.37857600 | 59.33725200 | 49.67597000 |

|    |             |             |             |
|----|-------------|-------------|-------------|
| N  | 37.54297800 | 59.56226200 | 50.39994200 |
| H  | 37.96486200 | 58.95961500 | 51.10952900 |
| C  | 37.94112900 | 60.83789000 | 50.18746800 |
| H  | 38.81322800 | 61.26769200 | 50.65837600 |
| N  | 37.10550800 | 61.46346400 | 49.36579600 |
| C  | 36.13315300 | 60.52907000 | 49.04126600 |
| H  | 35.31854100 | 60.76797200 | 48.37472000 |
| C  | 35.12667800 | 66.12416800 | 53.73775400 |
| H  | 35.24265500 | 65.75556700 | 54.76544200 |
| H  | 35.74893100 | 67.02357200 | 53.65493600 |
| C  | 35.61125400 | 65.10426700 | 52.75421100 |
| N  | 35.34723200 | 63.75184500 | 52.88655900 |
| H  | 34.85812800 | 63.28712800 | 53.65825400 |
| C  | 35.80422300 | 63.11584000 | 51.79178200 |
| H  | 35.73246600 | 62.05167200 | 51.63745600 |
| N  | 36.35973000 | 63.98133500 | 50.95489300 |
| C  | 36.25053200 | 65.22662700 | 51.54663000 |
| H  | 36.60499400 | 66.11414100 | 51.04554200 |
| C  | 45.08774500 | 66.68503900 | 46.44740200 |
| H  | 44.72923300 | 65.65490300 | 46.59785700 |
| H  | 45.21796500 | 66.82075200 | 45.37040000 |
| C  | 43.90048800 | 67.53663600 | 46.90946400 |
| O  | 43.55058500 | 67.59772500 | 48.11259100 |
| O  | 43.22518700 | 68.05758100 | 45.95308200 |
| Fe | 36.92615400 | 63.60557700 | 48.96148300 |
| O  | 40.38057200 | 64.10962300 | 48.57391600 |
| O  | 41.76010100 | 63.95193400 | 48.36588600 |
| H  | 37.86848400 | 62.18564600 | 46.48314500 |
| O  | 38.16871400 | 62.99668500 | 47.02674800 |
| C  | 39.32272000 | 63.53376200 | 46.62304100 |

|   |             |             |             |
|---|-------------|-------------|-------------|
| C | 40.10288900 | 62.95501000 | 45.62930300 |
| C | 39.83050800 | 64.74965700 | 47.35376700 |
| H | 39.82700600 | 61.99375800 | 45.20767400 |
| C | 41.20875500 | 63.64297200 | 45.12956400 |
| C | 38.76119900 | 65.78083300 | 47.83932200 |
| C | 40.99428000 | 65.43792500 | 46.70131400 |
| H | 41.79260700 | 63.19893800 | 44.32714000 |
| C | 41.58521200 | 64.93594700 | 45.58596300 |
| O | 39.04195400 | 66.98865500 | 47.74365400 |
| O | 37.69472800 | 65.31135700 | 48.34665900 |
| H | 41.31187200 | 66.36333300 | 47.15839800 |
| O | 42.59523500 | 65.55684200 | 44.89046900 |
| H | 42.75632100 | 66.48334900 | 45.21808900 |
| O | 39.35931500 | 65.52734300 | 50.99762900 |
| H | 39.98902400 | 65.19622800 | 50.33196100 |
| H | 39.72282100 | 65.20361500 | 51.85926100 |
| O | 37.20815800 | 61.17953600 | 45.47535600 |
| H | 36.22353200 | 61.16002600 | 45.35430500 |
| H | 37.45560600 | 60.20376700 | 45.54760800 |
| O | 43.88844400 | 63.63929800 | 43.19362800 |
| H | 43.66616100 | 64.37529100 | 43.80065700 |
| H | 44.15520900 | 64.04851200 | 42.34119700 |
| H | 45.97959500 | 66.80511100 | 46.88350500 |
| H | 34.16400400 | 66.36660700 | 53.61741000 |
| H | 35.17957000 | 57.70313900 | 50.40180000 |
| H | 30.84941000 | 62.97146200 | 49.30478200 |

Structure of **TS23c**

|   |               |               |               |
|---|---------------|---------------|---------------|
| C | 31.3822099271 | 62.9048060505 | 48.4338654706 |
|---|---------------|---------------|---------------|

|   |               |               |               |
|---|---------------|---------------|---------------|
| H | 30.8065266400 | 63.4789017951 | 47.6966809189 |
| H | 31.2506641170 | 61.8486425197 | 48.1552416937 |
| C | 32.8647431547 | 63.2388385300 | 48.2660558590 |
| N | 33.4099251035 | 63.3162105534 | 46.9858297780 |
| H | 32.9074338870 | 63.2260593698 | 46.1083979035 |
| C | 34.7473486726 | 63.5009425000 | 47.0792505663 |
| H | 35.4002343559 | 63.6047063857 | 46.2256537784 |
| N | 35.1233120320 | 63.5428300996 | 48.3494091869 |
| C | 33.9576713681 | 63.3949540664 | 49.0941439526 |
| H | 33.9923839221 | 63.4238317745 | 50.1706231803 |
| C | 35.5415674732 | 58.0933706875 | 49.5413623988 |
| H | 34.7239951295 | 58.2860667428 | 48.8404703672 |
| H | 36.1614565943 | 57.3110113097 | 49.0751089951 |
| C | 36.3335986162 | 59.3749860862 | 49.6340272088 |
| N | 37.5363852545 | 59.5796587272 | 50.3031234074 |
| H | 37.9806800469 | 58.9698090493 | 50.9913498717 |
| C | 37.9444962780 | 60.8486672889 | 50.0836499745 |
| H | 38.8412722403 | 61.2807178416 | 50.5015848860 |
| N | 37.0725794072 | 61.4880597276 | 49.3099437792 |
| C | 36.0730394498 | 60.5739029973 | 49.0202377340 |
| H | 35.2361066558 | 60.8275960351 | 48.3889662174 |
| C | 35.0678323152 | 66.1022469470 | 53.7668757846 |
| H | 35.1925446225 | 65.7011073120 | 54.7803591514 |
| H | 35.6809198874 | 67.0109059192 | 53.7162911964 |
| C | 35.5856907824 | 65.1212098183 | 52.7544285770 |
| N | 35.4208670561 | 63.7537912116 | 52.8884036486 |
| H | 34.9491794321 | 63.2701315710 | 53.6566784512 |
| C | 35.9358696850 | 63.1489522400 | 51.8001617923 |
| H | 35.9563144098 | 62.0825401147 | 51.6523157023 |
| N | 36.4244679846 | 64.0540601360 | 50.9625396467 |

|    |               |               |               |
|----|---------------|---------------|---------------|
| C  | 36.2198460558 | 65.2890927298 | 51.5478930489 |
| H  | 36.5276968766 | 66.1995202854 | 51.0591120035 |
| C  | 45.2713234804 | 66.8403273030 | 46.2138087034 |
| H  | 44.9516575729 | 65.7935544188 | 46.1091745361 |
| H  | 45.4465895672 | 67.1999418649 | 45.1946556497 |
| C  | 44.0109154728 | 67.5402996314 | 46.7449464802 |
| O  | 43.7053432130 | 67.5714321939 | 47.9599476275 |
| O  | 43.2356779300 | 67.9727493688 | 45.8186923441 |
| Fe | 37.1637328089 | 63.5888668365 | 49.0298348754 |
| O  | 40.2362125064 | 64.0085145546 | 48.5530641323 |
| O  | 38.7620597616 | 63.5551331854 | 49.6444768628 |
| H  | 37.8490372294 | 62.0618686552 | 46.2810139940 |
| O  | 38.1224383700 | 62.8550696654 | 46.8450853217 |
| C  | 39.2904134177 | 63.3974985039 | 46.4848261727 |
| C  | 40.0563723001 | 62.8865286529 | 45.4531517743 |
| C  | 39.7624439729 | 64.5610119196 | 47.3393196272 |
| H  | 39.7326261396 | 61.9929350567 | 44.9283817162 |
| C  | 41.2225916825 | 63.5454717601 | 45.0468127911 |
| C  | 38.6791754353 | 65.6596510180 | 47.6500921103 |
| C  | 41.0202977176 | 65.1813756332 | 46.8182299831 |
| H  | 41.8046770467 | 63.1675940959 | 44.2117847106 |
| C  | 41.6663930837 | 64.7178572619 | 45.6977344253 |
| O  | 38.9861535681 | 66.8543509280 | 47.5275519931 |
| O  | 37.5245057780 | 65.2403802612 | 48.0400069122 |
| H  | 41.3920081648 | 66.0360939587 | 47.3702405074 |
| O  | 42.7434195203 | 65.3468151248 | 45.1225992205 |
| H  | 42.7929017216 | 66.3141031784 | 45.3504312317 |
| O  | 39.1646700099 | 65.7415392137 | 51.2448084096 |
| H  | 39.1608415273 | 65.0267119356 | 50.5773449459 |
| H  | 39.6667582679 | 65.3617340790 | 52.0070355953 |

|   |               |               |               |
|---|---------------|---------------|---------------|
| O | 37.2214322516 | 60.9692126772 | 45.2381379916 |
| H | 36.2267250782 | 60.9554087613 | 45.2108335317 |
| H | 37.4901893791 | 60.0087696768 | 45.4181145012 |
| O | 43.9396706555 | 63.6855789384 | 43.1560184243 |
| H | 43.7128423644 | 64.3823454226 | 43.8062445967 |
| H | 44.2165155636 | 64.1307832386 | 42.3259479261 |
| H | 46.1270732894 | 66.8959187336 | 46.7282033547 |
| H | 34.1028431207 | 66.3406744380 | 53.6575680262 |
| H | 35.1268656513 | 57.7522590986 | 50.3849649608 |
| H | 30.9275958507 | 63.0561470472 | 49.3116023015 |

### Structure of **3a**

|   |             |             |             |
|---|-------------|-------------|-------------|
| C | 31.19751100 | 62.84270600 | 48.42446700 |
| H | 30.55579800 | 63.37867000 | 47.71346700 |
| H | 31.07830600 | 61.77435000 | 48.19163500 |
| C | 32.64725400 | 63.20872000 | 48.16901400 |
| N | 33.13877700 | 63.21486700 | 46.86869700 |
| H | 32.60731900 | 63.06212600 | 46.01786800 |
| C | 34.47408000 | 63.43042500 | 46.90276400 |
| H | 35.09220000 | 63.47432600 | 46.01803600 |
| N | 34.89193800 | 63.56888000 | 48.15148800 |
| C | 33.76036300 | 63.44835100 | 48.94571600 |
| H | 33.83597500 | 63.54879800 | 50.01733100 |
| C | 35.54656500 | 58.07530200 | 49.52610600 |
| H | 34.72494500 | 58.26084500 | 48.82795900 |
| H | 36.16172100 | 57.28539000 | 49.06584400 |

|    |             |             |             |
|----|-------------|-------------|-------------|
| C  | 36.33953700 | 59.35775500 | 49.59849300 |
| N  | 37.52458400 | 59.57899700 | 50.29043600 |
| H  | 37.95109900 | 58.98332400 | 51.00150000 |
| C  | 37.93899600 | 60.84253200 | 50.04247600 |
| H  | 38.82904800 | 61.26919500 | 50.48032000 |
| N  | 37.09503900 | 61.46372100 | 49.22520800 |
| C  | 36.10017600 | 60.53959600 | 48.94305700 |
| H  | 35.27815300 | 60.77723000 | 48.28531600 |
| C  | 35.10190200 | 66.02732700 | 53.78342400 |
| H  | 35.20654400 | 65.61045000 | 54.79353800 |
| H  | 35.74155900 | 66.91749900 | 53.74777400 |
| C  | 35.59213300 | 65.04099400 | 52.76163000 |
| N  | 35.35817100 | 63.68064400 | 52.86286700 |
| H  | 34.86896700 | 63.19949400 | 53.62395000 |
| C  | 35.84184500 | 63.07893300 | 51.75640600 |
| H  | 35.80233300 | 62.01514100 | 51.58503100 |
| N  | 36.38178900 | 63.97336200 | 50.93971700 |
| C  | 36.23705600 | 65.20151000 | 51.55942700 |
| H  | 36.58181700 | 66.10656400 | 51.08413300 |
| C  | 45.17116200 | 66.73672500 | 46.26149900 |
| H  | 44.83153400 | 65.69039400 | 46.29038100 |
| H  | 45.33469600 | 66.97179400 | 45.20554800 |
| C  | 43.93719800 | 67.52151400 | 46.73899100 |
| O  | 43.65047000 | 67.65436300 | 47.95332000 |
| O  | 43.16897100 | 67.91931600 | 45.79203800 |
| Fe | 36.94333000 | 63.60812400 | 48.89647900 |
| O  | 40.48101100 | 64.21615000 | 48.74339100 |
| O  | 39.78384300 | 62.94055600 | 48.42427800 |
| H  | 37.99060400 | 62.33862000 | 46.32109700 |
| O  | 38.18573500 | 63.23529300 | 46.72413800 |



|   |             |             |             |
|---|-------------|-------------|-------------|
| C | 39.53305600 | 63.40612000 | 47.05513100 |
| C | 40.43680800 | 62.74152800 | 46.05578000 |
| C | 39.96064000 | 64.83583000 | 47.48312400 |
| H | 40.24539000 | 61.69385600 | 45.83984100 |
| C | 41.41476600 | 63.41797200 | 45.43500900 |
| C | 38.81207700 | 65.82921700 | 47.87232400 |
| C | 41.02302000 | 65.49470100 | 46.69796600 |
| H | 42.04347700 | 62.93873700 | 44.69056800 |
| C | 41.66936200 | 64.83536200 | 45.71838400 |
| O | 38.99568800 | 67.04059700 | 47.65429700 |
| O | 37.78727000 | 65.33085600 | 48.43404300 |
| H | 41.21706300 | 66.54268000 | 46.88374800 |
| O | 42.58796200 | 65.41592200 | 44.89403700 |
| H | 42.73837700 | 66.37793000 | 45.13193000 |
| O | 39.29631700 | 65.49133900 | 51.07035100 |
| H | 39.78873900 | 65.03267200 | 50.36559800 |
| H | 39.71746800 | 65.18965500 | 51.91411300 |
| O | 37.28501700 | 61.08141800 | 45.37896400 |
| H | 36.29743800 | 61.06229000 | 45.30057000 |
| H | 37.54937900 | 60.11732800 | 45.46479200 |
| O | 43.88412300 | 63.66370100 | 43.10220400 |
| H | 43.56789000 | 64.37061700 | 43.70184100 |
| H | 44.15489700 | 64.09409000 | 42.26185700 |
| H | 46.03936700 | 66.83173700 | 46.74852300 |
| H | 34.14534800 | 66.29636600 | 53.67107400 |
| H | 35.13521700 | 57.74460800 | 50.37547900 |
| H | 30.81168700 | 63.01525600 | 49.33075900 |

Structure of **3b**

|   |             |             |             |
|---|-------------|-------------|-------------|
| C | 31.17735600 | 62.80465200 | 48.39885100 |
|---|-------------|-------------|-------------|

|   |             |             |             |
|---|-------------|-------------|-------------|
| H | 30.52823000 | 63.33004300 | 47.68599800 |
| H | 31.05596300 | 61.73345600 | 48.18096600 |
| C | 32.62451900 | 63.16591600 | 48.12759900 |
| N | 33.13049100 | 63.11204900 | 46.83468800 |
| H | 32.61442400 | 62.91051900 | 45.98370600 |
| C | 34.46436900 | 63.34088100 | 46.87442000 |
| H | 35.09164900 | 63.34138200 | 45.99509600 |
| N | 34.86652900 | 63.54683300 | 48.11832600 |
| C | 33.72560400 | 63.45769300 | 48.90283600 |
| H | 33.78310900 | 63.61373600 | 49.96868800 |
| C | 35.58302800 | 58.06482700 | 49.55771000 |
| H | 34.77633400 | 58.24499400 | 48.84097500 |
| H | 36.21673800 | 57.28293000 | 49.10956400 |
| C | 36.35460800 | 59.35413900 | 49.66973900 |
| N | 37.52594800 | 59.57678900 | 50.38100300 |
| H | 37.96565300 | 58.96619000 | 51.07164800 |
| C | 37.90269900 | 60.86304700 | 50.19145500 |
| H | 38.77470800 | 61.29427300 | 50.66073900 |
| N | 37.04791600 | 61.49399400 | 49.39708600 |
| C | 36.08619800 | 60.55514200 | 49.06282500 |
| H | 35.26363500 | 60.79523600 | 48.40657800 |
| C | 35.08367400 | 66.08621200 | 53.77303400 |
| H | 35.19391600 | 65.69775100 | 54.79319700 |
| H | 35.71089400 | 66.98293700 | 53.70761200 |
| C | 35.56633000 | 65.08166100 | 52.77108500 |
| N | 35.29010600 | 63.72868900 | 52.87334400 |
| H | 34.79689100 | 63.25432000 | 53.63656200 |
| C | 35.75174500 | 63.11129200 | 51.77015400 |
| H | 35.67639900 | 62.05058100 | 51.59561600 |
| N | 36.31957900 | 63.98958000 | 50.95388400 |

|    |             |             |             |
|----|-------------|-------------|-------------|
| C  | 36.21527500 | 65.22336700 | 51.57065100 |
| H  | 36.57654700 | 66.11874000 | 51.08847400 |
| C  | 45.16774600 | 66.70539600 | 46.35733400 |
| H  | 44.81444600 | 65.66805800 | 46.45113200 |
| H  | 45.30871500 | 66.89099400 | 45.28940000 |
| C  | 43.96964100 | 67.53092400 | 46.83980900 |
| O  | 43.64823900 | 67.59936700 | 48.05019000 |
| O  | 43.25147400 | 68.01985600 | 45.89865300 |
| Fe | 36.89175300 | 63.63881000 | 48.95565800 |
| O  | 40.57748600 | 64.27476000 | 48.69068200 |
| O  | 41.90206400 | 64.56065700 | 48.06439400 |
| H  | 37.91598400 | 62.14641300 | 46.64737400 |
| O  | 38.24902100 | 62.89820200 | 47.21678200 |
| C  | 39.37816900 | 63.47734300 | 46.70419800 |
| C  | 40.03744600 | 63.00102800 | 45.62585000 |
| C  | 39.88252100 | 64.68755200 | 47.45066800 |
| H  | 39.67147400 | 62.10650500 | 45.12959900 |
| C  | 41.17026500 | 63.69213000 | 45.02922100 |
| C  | 38.80766200 | 65.75741200 | 47.81828700 |
| C  | 41.22919500 | 65.23566600 | 46.93797200 |
| H  | 41.53915900 | 63.34906700 | 44.06805600 |
| C  | 41.70733700 | 64.78963800 | 45.59435300 |
| O  | 39.10407200 | 66.95405700 | 47.64689000 |
| O  | 37.71711900 | 65.32904600 | 48.30604500 |
| H  | 41.31242400 | 66.31499400 | 47.07658700 |
| O  | 42.69241500 | 65.49488900 | 44.95121100 |
| H  | 42.78573100 | 66.43578200 | 45.26131000 |
| O  | 39.34395600 | 65.49201200 | 50.98446600 |
| H  | 39.98498000 | 65.16607100 | 50.32622300 |
| H  | 39.70577900 | 65.19136900 | 51.85536000 |

|   |             |             |             |
|---|-------------|-------------|-------------|
| O | 37.22222500 | 61.11323600 | 45.48931600 |
| H | 36.24037300 | 61.07678200 | 45.35385700 |
| H | 37.49637300 | 60.14664800 | 45.52634800 |
| O | 43.93647000 | 63.67841700 | 43.14193200 |
| H | 43.67869900 | 64.38339700 | 43.77093700 |
| H | 44.20914900 | 64.12086200 | 42.30975200 |
| H | 46.04915700 | 66.81017700 | 46.81791600 |
| H | 34.12323200 | 66.33776900 | 53.65358000 |
| H | 35.15549600 | 57.73021600 | 50.39750200 |
| H | 30.80509500 | 62.99166100 | 49.30794400 |

### Structure of **3c**

|   |               |               |               |
|---|---------------|---------------|---------------|
| C | 31.3201417106 | 62.8731969454 | 48.4294311554 |
| H | 30.7166750525 | 63.4196512966 | 47.6936601601 |
| H | 31.1941537029 | 61.8082196355 | 48.1828203305 |
| C | 32.7885724921 | 63.2258564497 | 48.2347872548 |
| N | 33.3210671061 | 63.3807822068 | 46.9575186458 |
| H | 32.8136758372 | 63.3316988257 | 46.0791315672 |
| C | 34.6593473489 | 63.5728966621 | 47.0543595975 |
| H | 35.3023248544 | 63.7371079600 | 46.2016603226 |
| N | 35.0433378413 | 63.5459459010 | 48.3231729646 |
| C | 33.8849004881 | 63.3428696073 | 49.0614207650 |
| H | 33.9253472755 | 63.3056375293 | 50.1376060455 |
| C | 35.4856467550 | 58.0636844047 | 49.5168475014 |
| H | 34.6536152783 | 58.2407561181 | 48.8300212276 |
| H | 36.1070023241 | 57.2803709193 | 49.0559706600 |
| C | 36.2579510542 | 59.3490187616 | 49.6030107636 |
| N | 37.4548222013 | 59.5531410069 | 50.2793585241 |
| H | 37.9005018547 | 58.9330467657 | 50.9566138581 |
| C | 37.8335649667 | 60.8340780334 | 50.1077494568 |

|    |               |               |               |
|----|---------------|---------------|---------------|
| H  | 38.7203857225 | 61.2694371128 | 50.5402705366 |
| N  | 36.9476459444 | 61.4803426491 | 49.3548169185 |
| C  | 35.9669868759 | 60.5590187621 | 49.0291258955 |
| H  | 35.1224968668 | 60.8173920944 | 48.4097388357 |
| C  | 35.0280456665 | 66.1612124884 | 53.8064035634 |
| H  | 35.1485540450 | 65.7813766650 | 54.8273959138 |
| H  | 35.6199638449 | 67.0818207993 | 53.7389233668 |
| C  | 35.5443642001 | 65.1715059728 | 52.8076889726 |
| N  | 35.3263235717 | 63.8134409792 | 52.9369590634 |
| H  | 34.8573833201 | 63.3364271896 | 53.7118977398 |
| C  | 35.7768331551 | 63.1963607060 | 51.8294283204 |
| H  | 35.7562831577 | 62.1305207946 | 51.6762766431 |
| N  | 36.2682556842 | 64.0902856333 | 50.9834452496 |
| C  | 36.1490991168 | 65.3269873453 | 51.5833398608 |
| H  | 36.4579044025 | 66.2299120703 | 51.0776079257 |
| C  | 45.3424375877 | 67.0110155929 | 46.1110092740 |
| H  | 45.0596453536 | 66.0028417550 | 45.7900817713 |
| H  | 45.5412042399 | 67.5558758090 | 45.1846470758 |
| C  | 44.0395486035 | 67.5906579239 | 46.6833053064 |
| O  | 43.7658526143 | 67.6281831412 | 47.9033743906 |
| O  | 43.2110532383 | 67.9620987421 | 45.7729576735 |
| Fe | 37.0751598030 | 63.5613414930 | 49.1384143316 |
| O  | 40.5972605529 | 64.0456669071 | 48.5106911621 |
| O  | 38.5200598746 | 63.4362446503 | 49.8410640402 |
| H  | 38.1315140771 | 61.8749643126 | 46.4020005151 |
| O  | 38.4634451456 | 62.6051636635 | 47.0131401598 |
| C  | 39.5021962027 | 63.2656993991 | 46.5527231907 |
| C  | 40.1801317475 | 62.8543111077 | 45.4127384147 |
| C  | 39.9459775050 | 64.4887655604 | 47.3616487598 |
| H  | 39.8887022367 | 61.9420989367 | 44.9001168398 |

|   |               |               |               |
|---|---------------|---------------|---------------|
| C | 41.2360044474 | 63.6227353577 | 44.9211105732 |
| C | 38.7577938174 | 65.4981935717 | 47.6353343479 |
| C | 41.0772514903 | 65.2211033551 | 46.7013948347 |
| H | 41.7689581274 | 63.2884900815 | 44.0341753803 |
| C | 41.6808032847 | 64.8071921444 | 45.5401468803 |
| O | 38.9981620606 | 66.7098735806 | 47.5139668866 |
| O | 37.5941434312 | 65.0296496228 | 47.9609577765 |
| H | 41.4525915922 | 66.0683204477 | 47.2622347907 |
| O | 42.7328511816 | 65.4541861531 | 44.9281180303 |
| H | 42.8081613860 | 66.4124782794 | 45.2028911878 |
| O | 39.8243543159 | 65.5652120074 | 50.7875071947 |
| H | 40.1501023972 | 64.9878800165 | 50.0611547979 |
| H | 39.9926078783 | 65.1044343667 | 51.6408194681 |
| O | 37.3209459690 | 60.9044954416 | 45.2874540200 |
| H | 36.3292412145 | 60.9360608665 | 45.3039992232 |
| H | 37.5494456208 | 59.9263414198 | 45.4422236000 |
| O | 43.9491721509 | 63.7092726209 | 43.1027298931 |
| H | 43.7131929592 | 64.4270064740 | 43.7290157894 |
| H | 44.2375397515 | 64.1392768089 | 42.2678162353 |
| H | 46.1765563181 | 66.9927840894 | 46.6622928271 |
| H | 34.0586464395 | 66.3716184651 | 53.6799343433 |
| H | 35.0895177530 | 57.7392396195 | 50.3758104780 |
| H | 30.8940029647 | 63.0473385505 | 49.3171701208 |

Structure of **TS34a**

|   |               |               |               |
|---|---------------|---------------|---------------|
| C | 31.3022388941 | 62.8294557254 | 48.4677646393 |
| H | 30.6734004134 | 63.3400942906 | 47.7295552261 |
| H | 31.2078706142 | 61.7582700173 | 48.2399766409 |
| C | 32.7533760818 | 63.2331516389 | 48.2468727436 |

|   |               |               |               |
|---|---------------|---------------|---------------|
| N | 33.1559636782 | 64.0258646489 | 47.1782509335 |
| H | 32.5660863370 | 64.4447647075 | 46.4655333442 |
| C | 34.5060109631 | 64.1441316747 | 47.1978630881 |
| H | 35.0701447271 | 64.7490353558 | 46.5040249790 |
| N | 35.0167360207 | 63.4699476644 | 48.2160537908 |
| C | 33.9355711442 | 62.8994902729 | 48.8689153557 |
| H | 34.0784996081 | 62.2958174757 | 49.7510321404 |
| C | 35.5299272032 | 57.9747835111 | 49.5376525832 |
| H | 34.7129395384 | 58.1638052189 | 48.8356703265 |
| H | 36.1274923932 | 57.1614055415 | 49.0972088790 |
| C | 36.3506933504 | 59.2421756210 | 49.5770388193 |
| N | 37.5177216645 | 59.4718305788 | 50.2968692845 |
| H | 37.9226027004 | 58.8870353993 | 51.0289093185 |
| C | 37.9528977122 | 60.7231203714 | 50.0274218437 |
| H | 38.8364039210 | 61.1544253531 | 50.4748628937 |
| N | 37.1340307767 | 61.3316001966 | 49.1742312915 |
| C | 36.1438091392 | 60.4071827040 | 48.8808401962 |
| H | 35.3572307737 | 60.6271378668 | 48.1757346199 |
| C | 35.0808250179 | 66.0082650131 | 53.6463574477 |
| H | 35.2331723052 | 65.5870430434 | 54.6488039506 |
| H | 35.7227547145 | 66.8960916739 | 53.5866455544 |
| C | 35.5533123108 | 65.0189730971 | 52.6090422371 |
| N | 35.3577736140 | 63.6510849222 | 52.7373126875 |
| H | 34.8483214503 | 63.1801325903 | 53.4908962795 |
| C | 35.9159301688 | 63.0337469118 | 51.6790164807 |
| H | 35.9283496577 | 61.9645010205 | 51.5428609776 |
| N | 36.4735548380 | 63.9218758267 | 50.8612230585 |
| C | 36.2490261980 | 65.1666635366 | 51.4328857509 |
| H | 36.5885264342 | 66.0683113220 | 50.9481471969 |
| C | 45.2501887479 | 66.8133903635 | 46.1381514317 |

|    |               |               |               |
|----|---------------|---------------|---------------|
| H  | 44.9409357800 | 65.7649692166 | 46.0231375664 |
| H  | 45.4514045770 | 67.1620988117 | 45.1185910076 |
| C  | 43.9471174191 | 67.5291802090 | 46.5880157694 |
| O  | 43.7349620378 | 67.9249113546 | 47.7627827223 |
| O  | 43.0654612383 | 67.6185512374 | 45.6584975219 |
| Fe | 37.1347763793 | 63.5113625625 | 48.8733493022 |
| O  | 40.3713615341 | 64.5049257496 | 48.7032030987 |
| O  | 39.2028121676 | 63.1515628799 | 48.5915689968 |
| H  | 38.0063545807 | 62.2931990169 | 46.1751866566 |
| O  | 38.1216382725 | 63.2138967200 | 46.5514519157 |
| C  | 39.3686198156 | 63.4322238676 | 47.1643442721 |
| C  | 40.4610858004 | 62.6266024079 | 46.5108202605 |
| C  | 39.7837051579 | 64.8912933572 | 47.4190200064 |
| H  | 40.3580535268 | 61.5447189575 | 46.5317050605 |
| C  | 41.4916988008 | 63.2170147833 | 45.8811163611 |
| C  | 38.6034696407 | 65.8699287208 | 47.7125528871 |
| C  | 40.8304725387 | 65.4806426280 | 46.5597281084 |
| H  | 42.2553390307 | 62.6295586718 | 45.3785181164 |
| C  | 41.6414705987 | 64.6748949739 | 45.8394521609 |
| O  | 38.8040739052 | 67.0872747800 | 47.5575229167 |
| O  | 37.5162949144 | 65.3489166625 | 48.1516740312 |
| H  | 40.9371572530 | 66.5563624675 | 46.5271888948 |
| O  | 42.6257742550 | 65.1359600029 | 45.0285654896 |
| H  | 42.7688048515 | 66.1348981838 | 45.1656251775 |
| O  | 39.2193666743 | 65.5191936922 | 50.9928780371 |
| H  | 39.7518586201 | 65.1472381575 | 50.2611199780 |
| H  | 39.6517201122 | 65.2021856221 | 51.8241645481 |
| O  | 37.3163417593 | 60.9612830958 | 45.2409856154 |
| H  | 36.3228940730 | 60.9701513108 | 45.2586834877 |
| H  | 37.5619178001 | 60.0067409382 | 45.4576427914 |



|   |               |               |               |
|---|---------------|---------------|---------------|
| O | 43.9101958593 | 63.6226864576 | 43.0686352399 |
| H | 43.5292317788 | 64.2411058069 | 43.7260431843 |
| H | 44.1852732074 | 64.1360235630 | 42.2803975269 |
| H | 46.0987541957 | 66.8681556374 | 46.6643998955 |
| H | 34.1231829939 | 66.2915776324 | 53.5948238320 |
| H | 35.1130421241 | 57.6765010942 | 50.3962761507 |
| H | 30.8911009146 | 63.0078662579 | 49.3617082862 |

Structure of **TS34b**

|   |               |               |               |
|---|---------------|---------------|---------------|
| C | 31.1333676559 | 62.9011782082 | 48.4324760102 |
| H | 30.4905781364 | 63.4476373329 | 47.7296321987 |
| H | 30.9931511374 | 61.8351161889 | 48.2020483513 |
| C | 32.5843156317 | 63.2402798737 | 48.1675829786 |
| N | 33.1058530223 | 63.1199001489 | 46.8863227373 |
| H | 32.5961224120 | 62.8766464376 | 46.0432301522 |
| C | 34.4386878850 | 63.3529962959 | 46.9303727474 |
| H | 35.0784873881 | 63.3079779259 | 46.0613192865 |
| N | 34.8240249708 | 63.6234236879 | 48.1672290073 |
| C | 33.6740939399 | 63.5731356914 | 48.9420843220 |
| H | 33.7158165439 | 63.7798607892 | 50.0006739460 |
| C | 35.5093462203 | 58.1775919589 | 49.5153080972 |
| H | 34.6893078205 | 58.3820743411 | 48.8199044153 |
| H | 36.1200778236 | 57.3937552316 | 49.0464939267 |
| C | 36.3004345025 | 59.4549100700 | 49.6309949174 |
| N | 37.4970591748 | 59.6519118495 | 50.3082780307 |
| H | 37.9432466451 | 59.0249803047 | 50.9785153988 |
| C | 37.8851389509 | 60.9366641647 | 50.1296772859 |
| H | 38.7746158600 | 61.3529665043 | 50.5800322568 |
| N | 37.0148465798 | 61.5904381986 | 49.3708738455 |
| C | 36.0301467278 | 60.6686617490 | 49.0519498080 |

|    |               |               |               |
|----|---------------|---------------|---------------|
| H  | 35.1893852246 | 60.9294132767 | 48.4277126276 |
| C  | 34.9835341622 | 66.0656655241 | 53.8544612745 |
| H  | 35.0668222132 | 65.6454133601 | 54.8645882929 |
| H  | 35.6076836393 | 66.9662293200 | 53.8346395295 |
| C  | 35.5031078518 | 65.0938219284 | 52.8359840225 |
| N  | 35.2079914336 | 63.7425707827 | 52.8794203379 |
| H  | 34.6887801723 | 63.2526545089 | 53.6170474680 |
| C  | 35.7021596449 | 63.1562792633 | 51.7734267560 |
| H  | 35.6216869575 | 62.1020540185 | 51.5634898206 |
| N  | 36.3078309921 | 64.0550254925 | 51.0068185509 |
| C  | 36.1985405486 | 65.2679190655 | 51.6651715214 |
| H  | 36.5924864226 | 66.1739574002 | 51.2311477863 |
| C  | 45.4522186057 | 67.3684891816 | 46.0063256935 |
| H  | 45.3392918974 | 66.5610689006 | 45.2734797867 |
| H  | 45.5846033935 | 68.2755220320 | 45.3958119316 |
| C  | 44.0870604708 | 67.5976937729 | 46.6664477880 |
| O  | 43.9382539466 | 67.7177682139 | 47.9005289209 |
| O  | 43.1101098903 | 67.7112338371 | 45.8295662735 |
| Fe | 36.8545595403 | 63.7280399054 | 48.9905081570 |
| O  | 40.3288554475 | 64.0699976725 | 48.7346142417 |
| O  | 41.9685196726 | 64.2445565348 | 47.9896271146 |
| H  | 37.8865281361 | 62.0710937990 | 46.4431745749 |
| O  | 38.1661838554 | 62.8501306341 | 47.0063158701 |
| C  | 39.3653090727 | 63.3570026239 | 46.6500795760 |
| C  | 40.1071060119 | 62.8276664007 | 45.6217211382 |
| C  | 39.8650997985 | 64.5353372657 | 47.4581039885 |
| H  | 39.7299251519 | 61.9495327461 | 45.1038444843 |
| C  | 41.2848468223 | 63.4544208254 | 45.1162909446 |
| C  | 38.8049799559 | 65.6623063525 | 47.6787080181 |
| C  | 41.2629201014 | 65.0249353089 | 47.0161317325 |

|   |               |               |               |
|---|---------------|---------------|---------------|
| H | 41.7202824054 | 63.0951697350 | 44.1887340259 |
| C | 41.7836578100 | 64.6036393369 | 45.6856580983 |
| O | 39.1376323477 | 66.8296815981 | 47.4149593265 |
| O | 37.6758253479 | 65.3082375464 | 48.1576389529 |
| H | 41.3847358276 | 66.0971182719 | 47.1873281475 |
| O | 42.7188149931 | 65.3134854479 | 45.0353303665 |
| H | 42.8357809534 | 66.2720171292 | 45.3764582920 |
| O | 39.3257667786 | 65.4477785980 | 50.9342158303 |
| H | 39.8177356037 | 64.9699182357 | 50.2335899213 |
| H | 39.7287865004 | 65.1472437989 | 51.7855602290 |
| O | 37.2293324666 | 60.8803532334 | 45.3362207275 |
| H | 36.2358594097 | 60.8925957790 | 45.3036858595 |
| H | 37.4558771625 | 59.9280741151 | 45.5939302271 |
| O | 43.9930558210 | 63.7462903054 | 43.0970290675 |
| H | 43.6963184218 | 64.4135120189 | 43.7498977741 |
| H | 44.2834012255 | 64.2221897164 | 42.2904808064 |
| H | 46.2694945993 | 67.2371940301 | 46.5674152884 |
| H | 34.0258714508 | 66.3182537759 | 53.7163261729 |
| H | 35.0935757520 | 57.8291594529 | 50.3553852999 |
| H | 30.7682261422 | 63.0827387270 | 49.3455518302 |

Structure of **TS34c**

|   |             |             |             |
|---|-------------|-------------|-------------|
| C | 31.28180700 | 62.92019700 | 48.42971800 |
| H | 30.68775300 | 63.48740700 | 47.70113000 |
| H | 31.15920700 | 61.86251100 | 48.15345800 |
| C | 32.75239800 | 63.27615500 | 48.25959500 |
| N | 33.30776200 | 63.38799700 | 46.98841800 |
| H | 32.80961400 | 63.33901500 | 46.10604600 |
| C | 34.64498600 | 63.57636800 | 47.10212400 |
| H | 35.30538000 | 63.70319400 | 46.25720700 |

|   |             |             |             |
|---|-------------|-------------|-------------|
| N | 35.00654100 | 63.58853300 | 48.37616500 |
| C | 33.83383100 | 63.41944600 | 49.10106900 |
| H | 33.85389800 | 63.42613700 | 50.17778200 |
| C | 35.35875000 | 58.03628400 | 49.51570800 |
| H | 34.50683500 | 58.21327100 | 48.85331100 |
| H | 35.96339700 | 57.24882000 | 49.04079300 |
| C | 36.14066300 | 59.31999200 | 49.57300100 |
| N | 37.35115400 | 59.50157100 | 50.22987300 |
| H | 37.78728800 | 58.87156700 | 50.90283400 |
| C | 37.74668000 | 60.77718100 | 50.06481600 |
| H | 38.64623500 | 61.19160600 | 50.49087500 |
| N | 36.86145400 | 61.44558600 | 49.32940800 |
| C | 35.85976700 | 60.54033100 | 49.01227100 |
| H | 35.01036400 | 60.81820300 | 48.40734800 |
| C | 34.93696500 | 66.10970400 | 53.87074000 |
| H | 35.03998300 | 65.70857700 | 54.88624100 |
| H | 35.55235100 | 67.01638300 | 53.82851200 |
| C | 35.45213500 | 65.12375000 | 52.86343900 |
| N | 35.21094100 | 63.76612400 | 52.96614100 |
| H | 34.72833600 | 63.28052800 | 53.72840800 |
| C | 35.68550500 | 63.15741600 | 51.86374100 |
| H | 35.65295300 | 62.09445100 | 51.69210000 |
| N | 36.21425300 | 64.05529100 | 51.04543100 |
| C | 36.09355700 | 65.28564500 | 51.65856900 |
| H | 36.43616100 | 66.18788200 | 51.17573500 |
| C | 45.29041700 | 67.06896800 | 46.08379500 |
| H | 45.02829300 | 66.06727400 | 45.71409400 |
| H | 45.47598700 | 67.66617800 | 45.18364900 |
| C | 43.98796100 | 67.59831200 | 46.69275100 |
| O | 43.71601700 | 67.54966100 | 47.91190400 |

|    |             |             |             |
|----|-------------|-------------|-------------|
| O  | 43.16129900 | 68.02663100 | 45.80640200 |
| Fe | 37.02581000 | 63.55335900 | 49.19881300 |
| O  | 40.46641300 | 64.02029800 | 48.54621800 |
| O  | 38.46589000 | 63.35518100 | 49.89951700 |
| H  | 38.17294400 | 61.90217800 | 46.48868400 |
| O  | 38.39098100 | 62.73223100 | 47.01936500 |
| C  | 39.51212100 | 63.32902800 | 46.68126100 |
| C  | 40.34757700 | 62.76249000 | 45.68837500 |
| C  | 39.89438800 | 64.59556100 | 47.41050700 |
| H  | 40.14454700 | 61.76146300 | 45.32113100 |
| C  | 41.35053600 | 63.52594800 | 45.14261100 |
| C  | 38.71439600 | 65.57512700 | 47.74314100 |
| C  | 40.99993900 | 65.33753700 | 46.69582500 |
| H  | 41.96845500 | 63.12011900 | 44.34540400 |
| C  | 41.64991300 | 64.84445100 | 45.61258000 |
| O  | 38.94019000 | 66.79384300 | 47.65219100 |
| O  | 37.57320500 | 65.08521100 | 48.10786600 |
| H  | 41.31597000 | 66.26593900 | 47.15722700 |
| O  | 42.65291000 | 65.49268500 | 44.92456600 |
| H  | 42.73322400 | 66.44843200 | 45.19512700 |
| O  | 39.39342900 | 65.60876800 | 50.95495600 |
| H  | 39.77690300 | 65.04268000 | 50.25390300 |
| H  | 39.71370800 | 65.22495800 | 51.80571300 |
| O  | 37.42108900 | 60.86182400 | 45.38210800 |
| H  | 36.42820900 | 60.90283800 | 45.38677200 |
| H  | 37.63401000 | 59.87961000 | 45.49857600 |
| O  | 43.93361200 | 63.74735800 | 43.10953900 |
| H  | 43.66813000 | 64.46880400 | 43.71846700 |
| H  | 44.21507400 | 64.16653200 | 42.26790100 |
| H  | 46.12250400 | 67.04120500 | 46.63774600 |

|   |             |             |             |
|---|-------------|-------------|-------------|
| H | 33.97471100 | 66.34706400 | 53.73759000 |
| H | 34.99464100 | 57.71964100 | 50.39158600 |
| H | 30.84411700 | 63.06973400 | 49.31632200 |

Structure of **4a**

|   |               |               |               |
|---|---------------|---------------|---------------|
| C | 31.3067166238 | 62.8377507322 | 48.4665474117 |
| H | 30.6845059247 | 63.3675315329 | 47.7352692797 |
| H | 31.1968511448 | 61.7718947896 | 48.2251255618 |
| C | 32.7645903048 | 63.2296380849 | 48.2478296065 |
| N | 33.1717343394 | 64.0197850513 | 47.1771639631 |
| H | 32.5822459649 | 64.4475390839 | 46.4684456967 |
| C | 34.5208211316 | 64.1343773341 | 47.1946062243 |
| H | 35.0855366322 | 64.7345854005 | 46.4972823476 |
| N | 35.0321852019 | 63.4580755985 | 48.2136189290 |
| C | 33.9461130957 | 62.8927567752 | 48.8696333313 |
| H | 34.0831363334 | 62.2913969751 | 49.7535227659 |
| C | 35.5200680667 | 57.9660836733 | 49.5317508105 |
| H | 34.6929565196 | 58.1649860877 | 48.8429587933 |
| H | 36.1003240479 | 57.1457894288 | 49.0835118749 |
| C | 36.3420862936 | 59.2283471699 | 49.5724743108 |
| N | 37.5146211267 | 59.4637705902 | 50.2808974234 |
| H | 37.9287193802 | 58.8768020907 | 51.0053454936 |
| C | 37.9293505713 | 60.7243443213 | 50.0208639865 |
| H | 38.8174393726 | 61.1631688847 | 50.4491706401 |
| N | 37.0829034085 | 61.3292266592 | 49.1925226943 |
| C | 36.1061159630 | 60.3983785912 | 48.8973666655 |
| H | 35.3055382572 | 60.6139653331 | 48.2060867762 |
| C | 35.0818500123 | 66.0055088947 | 53.6384261145 |
| H | 35.2386419332 | 65.5826152691 | 54.6392274988 |
| H | 35.7243640970 | 66.8931847362 | 53.5784216544 |
| C | 35.5558125920 | 65.0180693418 | 52.5968239192 |

|    |               |               |               |
|----|---------------|---------------|---------------|
| N  | 35.3614016992 | 63.6482437219 | 52.7211294256 |
| H  | 34.8493513673 | 63.1774850449 | 53.4736358719 |
| C  | 35.9185472221 | 63.0312850653 | 51.6642431418 |
| H  | 35.9262145109 | 61.9627584862 | 51.5247752441 |
| N  | 36.4769980622 | 63.9237245789 | 50.8462038335 |
| C  | 36.2532506557 | 65.1689696421 | 51.4216893846 |
| H  | 36.5942420132 | 66.0706795805 | 50.9379302898 |
| C  | 45.2465937737 | 66.8020603469 | 46.1449846791 |
| H  | 44.9306342763 | 65.7507893776 | 46.0601794859 |
| H  | 45.4464933302 | 67.1151860584 | 45.1139657114 |
| C  | 43.9473830644 | 67.5315798692 | 46.5866615793 |
| O  | 43.7378377023 | 67.9409615080 | 47.7560240850 |
| O  | 43.0613781889 | 67.6108449433 | 45.6578009477 |
| Fe | 37.1727068388 | 63.5017503889 | 48.8735315162 |
| O  | 40.5836655409 | 64.7934773880 | 48.6246374105 |
| O  | 39.0372419978 | 63.0069805116 | 48.5575470418 |
| H  | 37.9981426041 | 62.3449787478 | 46.1750760221 |
| O  | 38.1347822992 | 63.2796101848 | 46.4918749666 |
| C  | 39.3521806190 | 63.4184873168 | 47.2618106890 |
| C  | 40.4505793935 | 62.6275016589 | 46.5760694298 |
| C  | 39.7784821060 | 64.8873073432 | 47.4803136241 |
| H  | 40.3526284510 | 61.5443086717 | 46.6053658878 |
| C  | 41.4676022254 | 63.2052831177 | 45.9022322178 |
| C  | 38.5924594469 | 65.8579629160 | 47.7362189359 |
| C  | 40.8067757044 | 65.4705465783 | 46.5725227789 |
| H  | 42.2065081350 | 62.6032544916 | 45.3799827278 |
| C  | 41.6285057675 | 64.6532545668 | 45.8517776916 |
| O  | 38.7639406576 | 67.0735146039 | 47.5593641226 |
| O  | 37.4984102306 | 65.3336530459 | 48.1929808813 |
| H  | 40.9383486665 | 66.5433325365 | 46.5630287983 |

|   |               |               |               |
|---|---------------|---------------|---------------|
| O | 42.6035515334 | 65.1274035845 | 45.0451045739 |
| H | 42.7509833708 | 66.1283100492 | 45.1864733657 |
| O | 39.2393022144 | 65.5036342610 | 50.9595950122 |
| H | 39.8357475647 | 65.2146547402 | 50.2348302310 |
| H | 39.6627056181 | 65.1781682784 | 51.7918348525 |
| O | 37.3075105221 | 60.9577854340 | 45.2351931181 |
| H | 36.3135976879 | 60.9664519695 | 45.2499972870 |
| H | 37.5496807840 | 60.0045038795 | 45.4569986067 |
| O | 43.9112428538 | 63.6189916436 | 43.0687267532 |
| H | 43.5131150080 | 64.2299783609 | 43.7204640527 |
| H | 44.1708541026 | 64.1277168941 | 42.2729273089 |
| H | 46.0972426338 | 66.8638094999 | 46.6670800334 |
| H | 34.1243691862 | 66.2902411089 | 53.5919714713 |
| H | 35.1089131609 | 57.6733819258 | 50.3950452739 |
| H | 30.8931454804 | 63.0109530378 | 49.3603929636 |

Structure of **4b**

|   |               |               |               |
|---|---------------|---------------|---------------|
| C | 31.0800025239 | 62.8551825973 | 48.5049352372 |
| H | 30.4437236083 | 63.3753081443 | 47.7797256863 |
| H | 30.9475794183 | 61.7865572377 | 48.2941472151 |
| C | 32.5302700255 | 63.2052364613 | 48.2412196931 |
| N | 32.9304485846 | 63.8782955377 | 47.0888525481 |
| H | 32.3294969344 | 64.1938070669 | 46.3381099528 |
| C | 34.2828513538 | 63.9920004433 | 47.0924336683 |
| H | 34.8454030361 | 64.5007919066 | 46.3263184503 |
| N | 34.7925239426 | 63.4323724382 | 48.1852576165 |
| C | 33.7103010394 | 62.9295536036 | 48.8961380319 |
| H | 33.8471651413 | 62.4236259076 | 49.8286188480 |
| C | 35.4337867668 | 58.0600613486 | 49.5432573408 |
| H | 34.6163254106 | 58.2750719642 | 48.8492490729 |
| H | 36.0062032670 | 57.2316435165 | 49.1013800313 |



|    |               |               |               |
|----|---------------|---------------|---------------|
| C  | 36.2776537800 | 59.3060257349 | 49.6177950222 |
| N  | 37.4349785405 | 59.5135930460 | 50.3596720309 |
| H  | 37.8372838493 | 58.9048148950 | 51.0749624754 |
| C  | 37.8519360744 | 60.7837598888 | 50.1654940298 |
| H  | 38.7190415303 | 61.2044357357 | 50.6537676273 |
| N  | 37.0355550862 | 61.4197621541 | 49.3317349366 |
| C  | 36.0638210145 | 60.4969088184 | 48.9757134409 |
| H  | 35.2753422061 | 60.7388714216 | 48.2801992303 |
| C  | 34.8578367206 | 65.9195223036 | 53.8352854197 |
| H  | 34.9453742223 | 65.4580875686 | 54.8262745257 |
| H  | 35.5248812745 | 66.7894215306 | 53.8355019114 |
| C  | 35.3401515057 | 64.9575336321 | 52.7793094477 |
| N  | 35.0701129342 | 63.6017174125 | 52.8176502665 |
| H  | 34.5432904514 | 63.1077111810 | 53.5473082728 |
| C  | 35.6089016399 | 63.0209037832 | 51.7292575713 |
| H  | 35.5790118338 | 61.9602344311 | 51.5366138625 |
| N  | 36.2141051538 | 63.9261753484 | 50.9678519359 |
| C  | 36.0552493077 | 65.1395884059 | 51.6187729539 |
| H  | 36.4199772214 | 66.0586308695 | 51.1845171039 |
| C  | 45.7381955902 | 67.5568823899 | 45.9065485017 |
| H  | 45.7307210533 | 66.8734565979 | 45.0530633153 |
| H  | 45.9051720558 | 68.5587794376 | 45.4772898634 |
| C  | 44.3425705316 | 67.6807370107 | 46.4941705766 |
| O  | 44.2328557269 | 68.1290271762 | 47.6573315807 |
| O  | 43.3298947449 | 67.4250676602 | 45.7398785125 |
| Fe | 36.8694104625 | 63.5180113964 | 48.9838354586 |
| O  | 40.3227961683 | 63.8757105879 | 48.7924238499 |
| O  | 42.3096165412 | 64.0820914848 | 47.7601809426 |
| H  | 38.0876714600 | 61.7710435626 | 46.5087456749 |
| O  | 38.4346267256 | 62.5049164924 | 47.0867360148 |

|   |               |               |               |
|---|---------------|---------------|---------------|
| C | 39.5307427460 | 63.1064839098 | 46.6516850091 |
| C | 40.2026879415 | 62.6528141799 | 45.5148108027 |
| C | 40.0194993574 | 64.2848811844 | 47.4862776257 |
| H | 39.8218835835 | 61.7769642860 | 44.9952548472 |
| C | 41.3129758711 | 63.3167987078 | 44.9865336980 |
| C | 38.9150695523 | 65.3986968638 | 47.6802889841 |
| C | 41.3835444066 | 64.8145729085 | 46.9981540054 |
| H | 41.7566929111 | 62.9880158425 | 44.0511990563 |
| C | 41.8197751260 | 64.4704359353 | 45.5999063142 |
| O | 39.2640519546 | 66.5946188441 | 47.5839982805 |
| O | 37.7510897390 | 65.0161421090 | 48.0432533441 |
| H | 41.4332533637 | 65.8962212436 | 47.1675322192 |
| O | 42.7428476820 | 65.1563515605 | 44.9615709988 |
| H | 43.0112690601 | 66.0932174436 | 45.3643650637 |
| O | 41.4521083980 | 65.5340051554 | 50.8019292636 |
| H | 40.9596060546 | 64.9468995201 | 50.1885657073 |
| H | 42.3088822328 | 65.7050649562 | 50.3223824334 |
| O | 37.0882925600 | 60.6512321019 | 45.4417167370 |
| H | 36.0925239572 | 60.6916416165 | 45.4990060723 |
| H | 37.3060168716 | 59.6727143355 | 45.6176830370 |
| O | 44.0446922461 | 63.7267396878 | 42.9079836341 |
| H | 43.7451479509 | 64.3575401424 | 43.5923259860 |
| H | 44.3693666906 | 64.2451953418 | 42.1417022063 |
| H | 46.4814467088 | 67.3575478164 | 46.5451747636 |
| H | 33.9128978067 | 66.2311684663 | 53.7354499640 |
| H | 35.0167013524 | 57.7649928405 | 50.4028935037 |
| H | 30.7096433571 | 63.0643741805 | 49.4099617390 |

Structure of **4c**

|   |               |               |               |
|---|---------------|---------------|---------------|
| C | 31.2781844702 | 62.9765755312 | 48.4270178337 |
| H | 30.6977823945 | 63.5722861885 | 47.7094021129 |

|   |               |               |               |
|---|---------------|---------------|---------------|
| H | 31.1292912239 | 61.9288693549 | 48.1261401137 |
| C | 32.7623643693 | 63.2924897590 | 48.2438897703 |
| N | 33.3294237492 | 63.2989057562 | 46.9695952944 |
| H | 32.8385099331 | 63.1834339926 | 46.0886651611 |
| C | 34.6709263399 | 63.4664386275 | 47.0768748224 |
| H | 35.3439875559 | 63.5000846225 | 46.2317514625 |
| N | 35.0267192982 | 63.5693566098 | 48.3493743091 |
| C | 33.8426344267 | 63.4809040566 | 49.0777223986 |
| H | 33.8472147605 | 63.5688702353 | 50.1503418064 |
| C | 35.2743213801 | 58.0371055581 | 49.5010174821 |
| H | 34.4129117586 | 58.2333424828 | 48.8561026559 |
| H | 35.8479259126 | 57.2313698539 | 49.0206586482 |
| C | 36.0896316782 | 59.3001330161 | 49.5345825054 |
| N | 37.3157661638 | 59.4475267814 | 50.1696867139 |
| H | 37.7514973962 | 58.8009611551 | 50.8265762347 |
| C | 37.7326299258 | 60.7161335854 | 50.0232747263 |
| H | 38.6432830283 | 61.1030471050 | 50.4501553539 |
| N | 36.8496279060 | 61.4126599517 | 49.3118045848 |
| C | 35.8254134977 | 60.5328603101 | 48.9924804464 |
| H | 34.9757775838 | 60.8360703999 | 48.4008206304 |
| C | 34.8873141151 | 66.0718556459 | 53.8511568846 |
| H | 34.9996094517 | 65.6511189337 | 54.8577180272 |
| H | 35.5129123232 | 66.9719103763 | 53.8176276874 |
| C | 35.3915373541 | 65.0959243659 | 52.8240479361 |
| N | 35.1485033213 | 63.7377722854 | 52.9109437613 |
| H | 34.6528234674 | 63.2514228828 | 53.6653113852 |
| C | 35.6435646563 | 63.1354606044 | 51.8133354254 |
| H | 35.6122618486 | 62.0735983702 | 51.6334480708 |
| N | 36.1850136632 | 64.0374568220 | 51.0079496396 |
| C | 36.0525581695 | 65.2648004655 | 51.6286800154 |

|    |               |               |               |
|----|---------------|---------------|---------------|
| H  | 36.3842118830 | 66.1740274498 | 51.1494743846 |
| C  | 45.4462844830 | 67.3192409180 | 45.9157141155 |
| H  | 45.3420690633 | 66.4620209576 | 45.2387011635 |
| H  | 45.6054781429 | 68.1781423670 | 45.2474893064 |
| C  | 44.0631950691 | 67.5832662515 | 46.5242915707 |
| O  | 43.8362841885 | 67.5796646785 | 47.7539381707 |
| O  | 43.1592953403 | 67.8380900524 | 45.6446200917 |
| Fe | 37.0796080933 | 63.4949180945 | 49.1704938466 |
| O  | 40.1772128626 | 63.4966675157 | 47.9770324716 |
| O  | 38.4537837037 | 63.2643055386 | 49.9801118138 |
| H  | 38.0053333032 | 61.9939023212 | 46.4546065695 |
| O  | 38.1715557566 | 62.8349396420 | 46.9422408832 |
| C  | 39.4751400643 | 63.2905416514 | 46.7681859253 |
| C  | 40.2400892289 | 62.7291089244 | 45.6318965824 |
| C  | 39.8308237821 | 64.6925152192 | 47.2074788993 |
| H  | 39.9231996034 | 61.7780878781 | 45.2138740264 |
| C  | 41.2908610633 | 63.3955868627 | 45.1091476352 |
| C  | 38.7493725490 | 65.6195896632 | 47.7781800872 |
| C  | 40.9590697036 | 65.3594098130 | 46.5395479051 |
| H  | 41.8673521566 | 62.9765030999 | 44.2895691838 |
| C  | 41.6543185202 | 64.7260700400 | 45.5678648921 |
| O  | 38.9260844203 | 66.8414756076 | 47.6309728558 |
| O  | 37.6771718886 | 65.1296192679 | 48.3107764648 |
| H  | 41.2146385641 | 66.3746663170 | 46.8150502635 |
| O  | 42.6915177519 | 65.3038733191 | 44.8838662849 |
| H  | 42.8081834250 | 66.2646009979 | 45.1369342258 |
| O  | 40.1869641721 | 65.2511638423 | 50.4878461364 |
| H  | 39.7951003387 | 64.4710960471 | 50.0575153583 |
| H  | 40.1320710083 | 65.0189644262 | 51.4426844985 |
| O  | 37.3366006685 | 60.7431394377 | 45.3348249429 |

|   |               |               |               |
|---|---------------|---------------|---------------|
| H | 36.3370316820 | 60.7207618182 | 45.3885196306 |
| H | 37.6252490629 | 59.7923430764 | 45.5378815926 |
| O | 44.0065438564 | 63.7119302476 | 43.0276498403 |
| H | 43.6669189091 | 64.3725826025 | 43.6687683381 |
| H | 44.2886087528 | 64.1886987262 | 42.2187827783 |
| H | 46.2463299980 | 67.2163624471 | 46.5067667310 |
| H | 33.9267898537 | 66.3267795651 | 53.7397704453 |
| H | 34.9230488192 | 57.7332479583 | 50.3866122805 |
| H | 30.8388337554 | 63.1134921485 | 49.3148380798 |

Structure of **TS45a**

|   |               |               |               |
|---|---------------|---------------|---------------|
| C | 31.2538319736 | 62.7917805428 | 48.4524871454 |
| H | 30.6174092755 | 63.3046597626 | 47.7220643030 |
| H | 31.1487951284 | 61.7207219988 | 48.2333484010 |
| C | 32.7015593168 | 63.1874436259 | 48.2228298452 |
| N | 33.1001847580 | 64.0562413999 | 47.2152931451 |
| H | 32.5072157847 | 64.5079166170 | 46.5270156261 |
| C | 34.4521508487 | 64.1670288167 | 47.2392580039 |
| H | 35.0146874854 | 64.8181770499 | 46.5870631169 |
| N | 34.9631200840 | 63.4174521205 | 48.2022053420 |
| C | 33.8836632546 | 62.8021570285 | 48.8112197628 |
| H | 34.0267062078 | 62.1303477786 | 49.6430854432 |
| C | 35.4955630131 | 57.9041938593 | 49.5112528159 |
| H | 34.6615357427 | 58.0981171468 | 48.8311074618 |
| H | 36.0649727219 | 57.0692198143 | 49.0726856788 |
| C | 36.3272849842 | 59.1562620930 | 49.5256574026 |
| N | 37.4703027752 | 59.3920547398 | 50.2776775407 |
| H | 37.8425924935 | 58.8157428835 | 51.0321071542 |
| C | 37.8924127270 | 60.6533379104 | 50.0272612430 |
| H | 38.7536311242 | 61.0971040503 | 50.5038292285 |
| N | 37.0945742263 | 61.2499665448 | 49.1517703256 |

|    |               |               |               |
|----|---------------|---------------|---------------|
| C  | 36.1284299087 | 60.3173825330 | 48.8236710653 |
| H  | 35.3570489793 | 60.5304698819 | 48.0988450031 |
| C  | 35.0871491327 | 66.0151259812 | 53.6777334919 |
| H  | 35.2212653310 | 65.6008418591 | 54.6859522648 |
| H  | 35.7351394608 | 66.8981597401 | 53.6193747988 |
| C  | 35.5539037086 | 65.0164241784 | 52.6524404358 |
| N  | 35.3132716145 | 63.6560439926 | 52.7684683179 |
| H  | 34.7980385645 | 63.1885756088 | 53.5211804044 |
| C  | 35.8412759214 | 63.0333193168 | 51.6972768794 |
| H  | 35.8162982286 | 61.9660239480 | 51.5447457203 |
| N  | 36.4193092191 | 63.9099762719 | 50.8866121174 |
| C  | 36.2444626501 | 65.1529306631 | 51.4724112177 |
| H  | 36.6051969621 | 66.0477992068 | 50.9896515437 |
| C  | 45.2064238428 | 66.7010253496 | 46.2120708925 |
| H  | 44.8802946110 | 65.6499131521 | 46.2471283010 |
| H  | 45.3977292519 | 66.9066751935 | 45.1537136965 |
| C  | 43.9326411506 | 67.4776045820 | 46.6067886903 |
| O  | 43.7175044425 | 67.9106774520 | 47.7623329790 |
| O  | 43.0666236328 | 67.5675065838 | 45.6544380893 |
| Fe | 37.0572775540 | 63.4258855349 | 48.9196236292 |
| O  | 40.7753889875 | 65.2352801836 | 48.4459355998 |
| O  | 39.1944202501 | 63.0339459947 | 48.6029181762 |
| H  | 38.0706887833 | 62.3723403422 | 46.2431606287 |
| O  | 38.2531049832 | 63.3016040784 | 46.5561841535 |
| C  | 39.4213509162 | 63.3736735643 | 47.3780618634 |
| C  | 40.5993569124 | 62.6936840386 | 46.7016609371 |
| C  | 39.8918218866 | 65.0921317575 | 47.4917539483 |
| H  | 40.6509275397 | 61.6247226616 | 46.9012792533 |
| C  | 41.5696967320 | 63.2709858139 | 45.9609230632 |
| C  | 38.5306518148 | 65.9420131715 | 47.7580623358 |

|   |               |               |               |
|---|---------------|---------------|---------------|
| C | 40.7237346380 | 65.5454299974 | 46.3463318241 |
| H | 42.3611512481 | 62.6681482234 | 45.5240985624 |
| C | 41.6341788317 | 64.6997368041 | 45.7517927207 |
| O | 38.7209682445 | 67.1314096061 | 47.4391339285 |
| O | 37.5528234141 | 65.3796618488 | 48.2742987126 |
| H | 40.7417396774 | 66.6023907689 | 46.1070079895 |
| O | 42.5742063195 | 65.1750760955 | 44.9243376665 |
| H | 42.7574087299 | 66.1839463935 | 45.1034707301 |
| O | 39.3528318103 | 65.5366659438 | 50.9024211914 |
| H | 39.9729539179 | 65.2193627630 | 50.2182626948 |
| H | 39.7120889212 | 65.1999493004 | 51.7597832674 |
| O | 37.3092406615 | 61.0155695684 | 45.2492726636 |
| H | 36.3176322818 | 61.0268988645 | 45.2618995848 |
| H | 37.5506043785 | 60.0601432458 | 45.4502621805 |
| O | 43.8734499843 | 63.5805276915 | 43.0323613224 |
| H | 43.4944567055 | 64.2214922387 | 43.6651723915 |
| H | 44.1561570761 | 64.0728588589 | 42.2313998476 |
| H | 46.0620641283 | 66.8142859592 | 46.7170973632 |
| H | 34.1312819103 | 66.2995924374 | 53.6042713364 |
| H | 35.0999918203 | 57.6381308035 | 50.3903056481 |
| H | 30.8641678633 | 62.9814679013 | 49.3536977685 |

Structure of **TS45b**

|   |               |               |               |
|---|---------------|---------------|---------------|
| C | 31.1312457768 | 62.9267464080 | 48.4611735083 |
| H | 30.5001666510 | 63.4825428696 | 47.7550357588 |
| H | 30.9976335463 | 61.8643337155 | 48.2117547850 |
| C | 32.5888388726 | 63.2719264265 | 48.2144014652 |
| N | 33.1164847642 | 63.1581760310 | 46.9330173792 |
| H | 32.6110761732 | 62.9097548813 | 46.0887871268 |
| C | 34.4481075467 | 63.3980745252 | 46.9817916723 |

|   |               |               |               |
|---|---------------|---------------|---------------|
| H | 35.0909171117 | 63.3621313744 | 46.1140328964 |
| N | 34.8306984744 | 63.6654006387 | 48.2210802750 |
| C | 33.6773190427 | 63.6061893807 | 48.9929918303 |
| H | 33.7155017730 | 63.8091964270 | 50.0530198305 |
| C | 35.4731273019 | 58.2010672219 | 49.5053325222 |
| H | 34.6453198657 | 58.4176342010 | 48.8227731417 |
| H | 36.0696185273 | 57.4158791137 | 49.0209668682 |
| C | 36.2860017848 | 59.4723315231 | 49.6000301885 |
| N | 37.5016858615 | 59.6615611745 | 50.2500262713 |
| H | 37.9464746321 | 59.0433044873 | 50.9297171378 |
| C | 37.9218967846 | 60.9279418415 | 50.0259856674 |
| H | 38.8335979427 | 61.3375487828 | 50.4380626045 |
| N | 37.0523000465 | 61.5817431630 | 49.2621391458 |
| C | 36.0362369363 | 60.6760635214 | 48.9905922084 |
| H | 35.1923256310 | 60.9407095113 | 48.3722689992 |
| C | 34.9534241022 | 66.0713880733 | 53.8514080700 |
| H | 35.0514010980 | 65.6500998486 | 54.8594263046 |
| H | 35.5678665101 | 66.9796432123 | 53.8316628363 |
| C | 35.4920073742 | 65.1080444237 | 52.8303308087 |
| N | 35.2285073008 | 63.7514313038 | 52.8783643211 |
| H | 34.7117007618 | 63.2574634340 | 53.6128327497 |
| C | 35.7575397579 | 63.1695733309 | 51.7832979126 |
| H | 35.7073849826 | 62.1115034660 | 51.5810687688 |
| N | 36.3532565052 | 64.0748342844 | 51.0179779714 |
| C | 36.2011488179 | 65.2889334286 | 51.6660665008 |
| H | 36.5659159812 | 66.2049609160 | 51.2250866409 |
| C | 45.5545530186 | 67.5906230812 | 45.9617648518 |
| H | 45.5466319214 | 66.9415023015 | 45.0819733057 |
| H | 45.7017942958 | 68.6076627987 | 45.5614162843 |
| C | 44.1299262938 | 67.6831969101 | 46.5232429146 |



|    |               |               |               |
|----|---------------|---------------|---------------|
| O  | 43.9100865338 | 68.1048287972 | 47.6849578782 |
| O  | 43.1955528362 | 67.4372444884 | 45.6740445659 |
| Fe | 36.9137972169 | 63.7079645886 | 48.9840711585 |
| O  | 39.8398572095 | 63.5781866112 | 48.5735045159 |
| O  | 42.2920411761 | 64.8812028870 | 48.0215338377 |
| H  | 37.7552919622 | 62.2037147374 | 46.2043500000 |
| O  | 37.9723356706 | 63.0869251867 | 46.6385182000 |
| C  | 39.2757532079 | 63.4181521126 | 46.5531180779 |
| C  | 40.1300961151 | 62.7561709826 | 45.6713447849 |
| C  | 39.7521750443 | 64.4268101907 | 47.5772136778 |
| H  | 39.7351335906 | 61.9026591554 | 45.1247722141 |
| C  | 41.3927254752 | 63.2477155400 | 45.3054281807 |
| C  | 38.8359141892 | 65.6956279799 | 47.8310800860 |
| C  | 41.4145729318 | 65.1042763196 | 47.0921424675 |
| H  | 41.9188162104 | 62.7828087344 | 44.4779009922 |
| C  | 41.9002580021 | 64.4351667952 | 45.8184527066 |
| O  | 39.1902249842 | 66.8424398695 | 47.5170576095 |
| O  | 37.7101862983 | 65.3964332816 | 48.3575912925 |
| H  | 41.0620323114 | 66.1396839668 | 46.9542206031 |
| O  | 42.9307299672 | 64.9883233791 | 45.1910506761 |
| H  | 43.0742584641 | 65.9871354243 | 45.4353784476 |
| O  | 40.8094643515 | 66.0016199224 | 50.3422272655 |
| H  | 41.4317390691 | 65.5880485537 | 49.7102483261 |
| H  | 41.3359425416 | 66.1769740713 | 51.1447346139 |
| O  | 37.1865262394 | 60.8641109272 | 45.3370130146 |
| H  | 36.1907214538 | 60.8638150375 | 45.2976049038 |
| H  | 37.4255168908 | 59.9324664479 | 45.6478983567 |
| O  | 43.9341092503 | 63.6384505969 | 42.9659148214 |
| H  | 43.7014766691 | 64.2568557656 | 43.6874067466 |
| H  | 44.2739004763 | 64.1575807497 | 42.2062720171 |

|   |               |               |               |
|---|---------------|---------------|---------------|
| H | 46.3304212619 | 67.3767828291 | 46.5553141890 |
| H | 33.9923566040 | 66.3157401070 | 53.7224067231 |
| H | 35.0660689771 | 57.8435687988 | 50.3458671126 |
| H | 30.7469357157 | 63.0927308840 | 49.3693336982 |

Structure of **TS45c**

|   |               |               |               |
|---|---------------|---------------|---------------|
| C | 31.3547424097 | 62.9405641556 | 48.4342015077 |
| H | 30.7765450795 | 63.5280476374 | 47.7091029271 |
| H | 31.2138472019 | 61.8888865446 | 48.1439666134 |
| C | 32.8371716889 | 63.2616943188 | 48.2723595619 |
| N | 33.4229880047 | 63.2347004116 | 47.0089967496 |
| H | 32.9474079608 | 63.0819945790 | 46.1250125353 |
| C | 34.7582822199 | 63.4229552000 | 47.1310150220 |
| H | 35.4419043173 | 63.4467506471 | 46.2956904697 |
| N | 35.0918544500 | 63.5682701681 | 48.4056102518 |
| C | 33.9005879577 | 63.4890407477 | 49.1194005858 |
| H | 33.8930017992 | 63.6143229798 | 50.1887137710 |
| C | 35.4661880352 | 58.0986511644 | 49.5195523904 |
| H | 34.6314084278 | 58.2930227098 | 48.8402279601 |
| H | 36.0808240215 | 57.3227079033 | 49.0389491953 |
| C | 36.2501842478 | 59.3778968838 | 49.6250263021 |
| N | 37.4483849764 | 59.5553763717 | 50.3071706310 |
| H | 37.8765688028 | 58.9187207945 | 50.9804992057 |
| C | 37.8488049368 | 60.8309698688 | 50.1559065632 |
| H | 38.7362211458 | 61.2456963984 | 50.6063990148 |
| N | 36.9773390676 | 61.5007084803 | 49.4064803281 |
| C | 35.9815143879 | 60.5996913279 | 49.0651333447 |
| H | 35.1446009071 | 60.8795865462 | 48.4456842088 |
| C | 34.9827088347 | 66.0708771744 | 53.8859818987 |
| H | 35.0560956156 | 65.6564863676 | 54.8986797704 |

|    |               |               |               |
|----|---------------|---------------|---------------|
| H  | 35.6103813219 | 66.9693083951 | 53.8663342139 |
| C  | 35.4924669192 | 65.0942586285 | 52.8755098313 |
| N  | 35.2801408742 | 63.7331483123 | 52.9751309512 |
| H  | 34.7968489654 | 63.2391138010 | 53.7332075665 |
| C  | 35.7443517443 | 63.1396989853 | 51.8624493711 |
| H  | 35.7248117352 | 62.0788221476 | 51.6813380029 |
| N  | 36.2362996549 | 64.0573428176 | 51.0406756134 |
| C  | 36.0974733171 | 65.2809462341 | 51.6594613193 |
| H  | 36.4135732010 | 66.1961281115 | 51.1857637807 |
| C  | 45.3340115882 | 66.9632496890 | 46.1484023437 |
| H  | 45.0464941882 | 65.9329721202 | 45.8966707621 |
| H  | 45.5201017531 | 67.4555674029 | 45.1880877236 |
| C  | 44.0342316451 | 67.5681856430 | 46.7099957383 |
| O  | 43.7599069228 | 67.6212832736 | 47.9305936538 |
| O  | 43.2072868482 | 67.9261161529 | 45.7955661839 |
| Fe | 37.1131476009 | 63.5722718302 | 49.2236207633 |
| O  | 39.9874053087 | 63.4478922963 | 47.7808316533 |
| O  | 38.5389442046 | 63.4758779712 | 49.9834294965 |
| H  | 37.8645855940 | 61.9148800952 | 46.1239240852 |
| O  | 38.0992531813 | 62.6804532782 | 46.7226263380 |
| C  | 39.3944181330 | 63.1058626099 | 46.5976178793 |
| C  | 40.1997190984 | 62.7653299541 | 45.4819161608 |
| C  | 39.8388227116 | 64.7545025838 | 47.2540401678 |
| H  | 39.8116684210 | 62.0302118776 | 44.7805959504 |
| C  | 41.3835828774 | 63.4093403825 | 45.1841168659 |
| C  | 38.7303091625 | 65.6357215048 | 47.7684196955 |
| C  | 40.9585655361 | 65.3490672673 | 46.6242939550 |
| H  | 41.9780979474 | 63.0502345435 | 44.3500405002 |
| C  | 41.7558268503 | 64.6598795508 | 45.7347512865 |
| O  | 38.8902849652 | 66.8653304740 | 47.6880638595 |

|   |               |               |               |
|---|---------------|---------------|---------------|
| O | 37.6176000696 | 65.0988066100 | 48.1875649613 |
| H | 41.1026483370 | 66.4183531259 | 46.7359066301 |
| O | 42.8372074834 | 65.2695593015 | 45.1338988959 |
| H | 42.8641138587 | 66.2436192918 | 45.3290261757 |
| O | 39.0246660452 | 65.7652479166 | 51.3898809512 |
| H | 38.9326623532 | 65.0251192616 | 50.7612487405 |
| H | 39.5751407726 | 65.3868686096 | 52.1210580219 |
| O | 37.1495948667 | 60.7592169556 | 45.0871782602 |
| H | 36.1592297814 | 60.7762827576 | 45.1276508800 |
| H | 37.4167089389 | 59.8097857783 | 45.3202581743 |
| O | 43.9914076435 | 63.6994404481 | 43.1545271727 |
| H | 43.7274163137 | 64.3668670652 | 43.8241949859 |
| H | 44.2568885299 | 64.1723042158 | 42.3384405299 |
| H | 46.1780539728 | 66.9704447068 | 46.6846305459 |
| H | 34.0272183610 | 66.3207898120 | 53.7291966052 |
| H | 35.0777847462 | 57.7562923874 | 50.3750834260 |
| H | 30.9111865385 | 63.0826235999 | 49.3191180594 |

Structure of **5a**

|   |               |               |               |
|---|---------------|---------------|---------------|
| C | 31.2210155769 | 62.8444319267 | 48.4316538995 |
| H | 30.5814739376 | 63.3785775804 | 47.7168551086 |
| H | 31.1090076135 | 61.7774864912 | 48.1917052402 |
| C | 32.6712283681 | 63.2283197934 | 48.1831680275 |
| N | 33.1395181551 | 63.3718240298 | 46.8823887849 |
| H | 32.5883802574 | 63.3193843406 | 46.0326909325 |
| C | 34.4764178890 | 63.5886571923 | 46.9143205385 |
| H | 35.0751422988 | 63.7351721708 | 46.0273962050 |
| N | 34.9196462112 | 63.5926660669 | 48.1616485545 |
| C | 33.8024591054 | 63.3801445776 | 48.9576310232 |
| H | 33.8979212433 | 63.3577294983 | 50.0318591428 |
| C | 35.5636076886 | 58.1442705738 | 49.5142073728 |

|    |               |               |               |
|----|---------------|---------------|---------------|
| H  | 34.7408457583 | 58.3283940161 | 48.8150417843 |
| H  | 36.1902158882 | 57.3727786105 | 49.0379809093 |
| C  | 36.3390805329 | 59.4383515720 | 49.6040216968 |
| N  | 37.5543006487 | 59.6413530909 | 50.2471116149 |
| H  | 38.0109768881 | 59.0226750889 | 50.9154982552 |
| C  | 37.9533623558 | 60.9149931451 | 50.0183651133 |
| H  | 38.8639976037 | 61.3299973469 | 50.4251323970 |
| N  | 37.0688448383 | 61.5619461827 | 49.2694036102 |
| C  | 36.0662134716 | 60.6417231699 | 49.0025336583 |
| H  | 35.2290050429 | 60.8886926662 | 48.3698254792 |
| C  | 35.0723225963 | 66.1049793951 | 53.8162950032 |
| H  | 35.1766902475 | 65.6822460329 | 54.8241402268 |
| H  | 35.6792802213 | 67.0172343145 | 53.7966884680 |
| C  | 35.6141798878 | 65.1424930716 | 52.7988141837 |
| N  | 35.4323673675 | 63.7717425720 | 52.8919658458 |
| H  | 34.9372871944 | 63.2720425315 | 53.6363702200 |
| C  | 35.9771817266 | 63.1892407621 | 51.8062927661 |
| H  | 35.9872816154 | 62.1251172145 | 51.6330450930 |
| N  | 36.5080337650 | 64.1079688118 | 51.0054481840 |
| C  | 36.2899413371 | 65.3309693971 | 51.6183029682 |
| H  | 36.5681097193 | 66.2529133819 | 51.1294512479 |
| C  | 45.1280577470 | 66.7467827378 | 46.3061049832 |
| H  | 44.7956413481 | 65.6990642784 | 46.3311781974 |
| H  | 45.2548126631 | 67.0056661923 | 45.2511062275 |
| C  | 43.9062292885 | 67.5217968669 | 46.8391099877 |
| O  | 43.6157568593 | 67.5427434684 | 48.0600237348 |
| O  | 43.1533993138 | 68.0357324101 | 45.9349861359 |
| Fe | 36.9954017399 | 63.7381024104 | 48.9733853535 |
| O  | 39.2473661016 | 63.8429745826 | 48.2223179169 |
| O  | 39.4832040771 | 60.6938068772 | 46.8728383228 |

|   |               |               |               |
|---|---------------|---------------|---------------|
| H | 37.7202504615 | 61.9562319697 | 46.0555512672 |
| O | 38.5459171417 | 62.5412879686 | 46.0114228294 |
| C | 39.5979547740 | 61.7781956124 | 46.3306701376 |
| C | 40.9415380308 | 62.2178296049 | 45.8736147518 |
| C | 39.4984198450 | 64.9821556868 | 47.8011071444 |
| H | 41.5180790363 | 61.3317632782 | 45.6184533734 |
| C | 41.6398327442 | 63.3625897368 | 45.7815464876 |
| C | 38.4840613003 | 66.1234269193 | 48.1088550447 |
| C | 40.5861486029 | 65.4187851164 | 46.9504875485 |
| H | 42.6438896669 | 63.2326744846 | 45.3847645284 |
| C | 41.4024466989 | 64.7751031909 | 46.0706451423 |
| O | 38.8305205852 | 67.3055873996 | 47.8917645425 |
| O | 37.3532669149 | 65.7193504902 | 48.5100004419 |
| H | 40.6716265171 | 66.4992400112 | 46.9358716999 |
| O | 42.2512659864 | 65.5067288097 | 45.2875002787 |
| H | 42.3064379060 | 66.4696898801 | 45.5283453684 |
| O | 40.2161461213 | 65.6467553226 | 50.7597692708 |
| H | 41.1586259768 | 65.8787433972 | 50.6233568272 |
| H | 40.1787840457 | 65.2138989119 | 51.6451729663 |
| O | 36.5704983900 | 60.8889235972 | 45.7636356294 |
| H | 35.6897314128 | 60.9026914486 | 45.3125388726 |
| H | 36.9713752169 | 59.9887696182 | 45.6104936155 |
| O | 43.9116030675 | 63.9799777207 | 43.3156621909 |
| H | 43.4709099375 | 64.6585577223 | 43.8622946774 |
| H | 44.1081429423 | 64.3727610845 | 42.4398408757 |
| H | 46.0094420579 | 66.8385954580 | 46.7694969564 |
| H | 34.1080522216 | 66.3418230490 | 53.6976032675 |
| H | 35.1548232816 | 57.7907823884 | 50.3555999158 |
| H | 30.8279450633 | 63.0166302747 | 49.3348943438 |

Structure of **5b**

|   |               |               |               |
|---|---------------|---------------|---------------|
| C | 31.0659686437 | 62.8109866797 | 48.4340214572 |
| H | 30.4288821492 | 63.3505593948 | 47.7208695990 |
| H | 30.9204336273 | 61.7423722140 | 48.2173509058 |
| C | 32.5217706672 | 63.1295703666 | 48.1575806964 |
| N | 33.0478406205 | 63.0044630606 | 46.8767896599 |
| H | 32.5476647965 | 62.7513200055 | 46.0306465230 |
| C | 34.3841548883 | 63.2198200347 | 46.9277638356 |
| H | 35.0275338547 | 63.1735635849 | 46.0608569204 |
| N | 34.7654575470 | 63.4814141202 | 48.1671752330 |
| C | 33.6135823629 | 63.4454134847 | 48.9350506007 |
| H | 33.6565709186 | 63.6535830665 | 49.9927829755 |
| C | 35.5257686705 | 58.0772911646 | 49.5351511547 |
| H | 34.7210975530 | 58.2662530217 | 48.8187426388 |
| H | 36.1513363445 | 57.2890150088 | 49.0899486894 |
| C | 36.3090806368 | 59.3605923894 | 49.6490947814 |
| N | 37.4854761682 | 59.5759483878 | 50.3550306384 |
| H | 37.9249201286 | 58.9572892052 | 51.0380687277 |
| C | 37.8578508342 | 60.8664957178 | 50.1840791856 |
| H | 38.7291070031 | 61.2937586466 | 50.6591531423 |
| N | 36.9978449165 | 61.5070532556 | 49.4026129879 |
| C | 36.0374971997 | 60.5689849395 | 49.0597433796 |
| H | 35.2124731154 | 60.8152578451 | 48.4097483936 |
| C | 34.9513020402 | 65.9997561806 | 53.8874709040 |
| H | 35.0371001186 | 65.5724584466 | 54.8943457494 |
| H | 35.5963912262 | 66.8854990083 | 53.8653639912 |
| C | 35.4385721341 | 65.0196388697 | 52.8608221503 |
| N | 35.1557433231 | 63.6663467611 | 52.9202757653 |
| H | 34.6499145934 | 63.1756877567 | 53.6663847282 |
| C | 35.6338027120 | 63.0755575919 | 51.8086658481 |
| H | 35.5629864662 | 62.0190865207 | 51.6058096936 |

|    |               |               |               |
|----|---------------|---------------|---------------|
| N  | 36.2162523677 | 63.9722846167 | 51.0240606875 |
| C  | 36.1062117272 | 65.1891009318 | 51.6731378202 |
| H  | 36.4523354143 | 66.1007636501 | 51.2098430255 |
| C  | 45.3619412513 | 66.7832035133 | 46.2313686106 |
| H  | 45.0155637658 | 65.7419109396 | 46.2621941430 |
| H  | 45.5408605877 | 67.0102278533 | 45.1772696479 |
| C  | 44.1549550830 | 67.5966569390 | 46.7172087938 |
| O  | 43.9150348972 | 67.7288357769 | 47.9421530243 |
| O  | 43.3502354167 | 67.9945037993 | 45.8042419523 |
| Fe | 36.7685821958 | 63.6672911115 | 49.0088336848 |
| O  | 40.5304908529 | 65.7162357441 | 47.6876843339 |
| O  | 42.9693336995 | 63.6649530189 | 47.6801646446 |
| H  | 38.1021232484 | 62.2480909474 | 46.8273093644 |
| O  | 38.3148922573 | 63.0343463486 | 47.3887959782 |
| C  | 39.4016057285 | 63.7526805211 | 46.9477821712 |
| C  | 40.2075376013 | 63.2744212246 | 45.9625195116 |
| C  | 39.4614726854 | 65.1444715416 | 47.4575590125 |
| H  | 39.9068715732 | 62.3202965520 | 45.5280182416 |
| C  | 41.2259292864 | 63.9975944947 | 45.2335324439 |
| C  | 38.1561957968 | 65.9580165918 | 47.5613462970 |
| C  | 42.7466101461 | 64.7226937121 | 47.1214216909 |
| H  | 41.1392587593 | 63.9499995127 | 44.1481378246 |
| C  | 42.2083067413 | 64.7819652905 | 45.7141635353 |
| O  | 38.1684667330 | 67.0536659854 | 46.9886816471 |
| O  | 37.2125054117 | 65.4332394203 | 48.2387775809 |
| H  | 43.0215890026 | 65.6741871648 | 47.5940051371 |
| O  | 42.9384542977 | 65.5357647025 | 44.8186638018 |
| H  | 43.0651473528 | 66.4837924675 | 45.1205928343 |
| O  | 39.6700193164 | 65.1739503466 | 50.6791600643 |
| H  | 40.5714838419 | 65.2520309897 | 50.3229756849 |



|   |               |               |               |
|---|---------------|---------------|---------------|
| H | 39.8086267141 | 64.9626064128 | 51.6343973318 |
| O | 37.3190853075 | 61.0094384491 | 45.6439808401 |
| H | 36.3327413993 | 60.9022109676 | 45.5764487578 |
| H | 37.6506052127 | 60.0581621635 | 45.6854055035 |
| O | 44.0177000631 | 63.6929985598 | 43.0445247697 |
| H | 43.7718318149 | 64.3992311672 | 43.6775011040 |
| H | 44.3168553847 | 64.1414686001 | 42.2248328908 |
| H | 46.2228775817 | 66.8625169763 | 46.7338604112 |
| H | 33.9983188207 | 66.2759851622 | 53.7628894720 |
| H | 35.0956200015 | 57.7464588519 | 50.3751047864 |
| H | 30.7067002273 | 63.0094573372 | 49.3459071973 |

Structure of **5c**

|   |               |               |               |
|---|---------------|---------------|---------------|
| C | 31.3569786653 | 62.9727539228 | 48.4367700829 |
| H | 30.7717607015 | 63.5520292022 | 47.7104755945 |
| H | 31.2401902323 | 61.9208993557 | 48.1372038684 |
| C | 32.8308394788 | 63.3330203717 | 48.2806182507 |
| N | 33.3963989751 | 63.4782007135 | 47.0137873964 |
| H | 32.9082393635 | 63.4352758442 | 46.1243450409 |
| C | 34.7318081084 | 63.6683745568 | 47.1383983447 |
| H | 35.4045664949 | 63.8260259280 | 46.3075337278 |
| N | 35.0824527086 | 63.6486962712 | 48.4168922347 |
| C | 33.9065863044 | 63.4576485252 | 49.1319840610 |
| H | 33.9187522389 | 63.4363740618 | 50.2087605620 |
| C | 35.4804378759 | 58.2009196102 | 49.5288668008 |
| H | 34.6500432013 | 58.4092303148 | 48.8460277234 |
| H | 36.0953607656 | 57.4400447078 | 49.0261282670 |
| C | 36.2724249003 | 59.4871870422 | 49.6402507783 |
| N | 37.4977999534 | 59.6595051401 | 50.2783926727 |
| H | 37.9587324688 | 59.0127920200 | 50.9185777934 |
| C | 37.9019917227 | 60.9363488815 | 50.1136788010 |

|    |               |               |               |
|----|---------------|---------------|---------------|
| H  | 38.8122428555 | 61.3427974030 | 50.5276272926 |
| N  | 37.0101763451 | 61.6155117628 | 49.4004881215 |
| C  | 35.9994931420 | 60.7158633792 | 49.0896916031 |
| H  | 35.1526243402 | 61.0021411453 | 48.4867218889 |
| C  | 34.9450910657 | 66.0572277734 | 53.9078698589 |
| H  | 35.0094117284 | 65.6194000864 | 54.9113033349 |
| H  | 35.5715355244 | 66.9563372696 | 53.9150130512 |
| C  | 35.4808505706 | 65.1032263315 | 52.8853795337 |
| N  | 35.2657023964 | 63.7396656529 | 52.9397681059 |
| H  | 34.7729118528 | 63.2258491970 | 53.6788861407 |
| C  | 35.7628284927 | 63.1756988039 | 51.8244186229 |
| H  | 35.7555839117 | 62.1180524891 | 51.6204396889 |
| N  | 36.2767069586 | 64.1162664779 | 51.0412165113 |
| C  | 36.1268006882 | 65.3213165654 | 51.6944159684 |
| H  | 36.4587752973 | 66.2500387310 | 51.2574944278 |
| C  | 45.3989116837 | 67.0842053575 | 46.0727202192 |
| H  | 45.1336543746 | 66.0823615317 | 45.7054839416 |
| H  | 45.6006351388 | 67.6702608139 | 45.1660419006 |
| C  | 44.0821851110 | 67.6409386360 | 46.6464509692 |
| O  | 43.8700791509 | 67.8230206126 | 47.8673803984 |
| O  | 43.1962713623 | 67.8742232648 | 45.7445409186 |
| Fe | 37.1075366308 | 63.7191933946 | 49.1857005695 |
| O  | 39.9270417540 | 63.5137604862 | 47.5266454007 |
| O  | 38.5672223040 | 63.7935333645 | 49.8823317269 |
| H  | 37.9835914348 | 61.5607211537 | 46.0401194788 |
| O  | 38.3869280508 | 62.0862249708 | 46.7910087170 |
| C  | 39.5102172092 | 62.7318766726 | 46.4797968492 |
| C  | 40.2747015981 | 62.6167604804 | 45.3551421241 |
| C  | 39.8455524101 | 64.8545146778 | 47.1370272500 |
| H  | 39.9782769629 | 61.8799438737 | 44.6129171537 |

|   |               |               |               |
|---|---------------|---------------|---------------|
| C | 41.4511990534 | 63.3922307578 | 45.0791364083 |
| C | 38.6417449313 | 65.6453023031 | 47.5298717945 |
| C | 40.8460439726 | 65.3905741499 | 46.3892688210 |
| H | 42.1114071036 | 63.0182193219 | 44.3005381497 |
| C | 41.7484095757 | 64.6368294752 | 45.5747980293 |
| O | 38.6858683533 | 66.8820102797 | 47.4788317164 |
| O | 37.5321261198 | 64.9819630102 | 47.8194799994 |
| H | 40.8734387450 | 66.4698251281 | 46.2734210668 |
| O | 42.8561089480 | 65.2849230840 | 45.0552062357 |
| H | 42.8776348019 | 66.2534639565 | 45.2875657437 |
| O | 39.2175064415 | 66.2406270178 | 51.2977292942 |
| H | 39.0552924764 | 65.5692166082 | 50.6117528492 |
| H | 39.6591533644 | 65.7339978172 | 52.0173653768 |
| O | 37.1011937145 | 60.6437927280 | 45.0233304462 |
| H | 36.1157424035 | 60.7401241960 | 45.0910492462 |
| H | 37.3105370373 | 59.6893945482 | 45.2977840726 |
| O | 44.0451552203 | 63.7546618235 | 43.0909183147 |
| H | 43.7547352613 | 64.4228841031 | 43.7510057840 |
| H | 44.3145556753 | 64.2258842028 | 42.2739338433 |
| H | 46.2285976030 | 67.0555673681 | 46.6302156369 |
| H | 33.9893476626 | 66.3075343753 | 53.7532698832 |
| H | 35.0795255958 | 57.8283317124 | 50.3657942780 |
| H | 30.9022459440 | 63.1045309419 | 49.3175952469 |

Structure of **TS56c**

|   |               |               |               |
|---|---------------|---------------|---------------|
| C | 31.2860362767 | 62.9454696730 | 48.4655044205 |
| H | 30.6724880003 | 63.4858120426 | 47.7348002993 |
| H | 31.1987743351 | 61.8833241325 | 48.1992166847 |
| C | 32.7347314504 | 63.3671013065 | 48.3058895900 |
| N | 33.1841988757 | 64.0006091349 | 47.1537658462 |
| H | 32.6207150725 | 64.3109168960 | 46.3685885412 |

|   |               |               |               |
|---|---------------|---------------|---------------|
| C | 34.5257898286 | 64.1675321945 | 47.2346459886 |
| H | 35.1207038305 | 64.6829020656 | 46.4962766464 |
| N | 34.9854893489 | 63.6725388165 | 48.3739632855 |
| C | 33.8809271174 | 63.1770056494 | 49.0455583884 |
| H | 33.9887493517 | 62.7297890036 | 50.0211188384 |
| C | 35.4909725641 | 58.2365806670 | 49.4903930821 |
| H | 34.6585395170 | 58.4509858183 | 48.8116618534 |
| H | 36.0924422557 | 57.4633173967 | 48.9926118914 |
| C | 36.2951866017 | 59.5176947323 | 49.5874561612 |
| N | 37.5167359924 | 59.7078714576 | 50.2260914919 |
| H | 37.9775071829 | 59.0789979118 | 50.8834305203 |
| C | 37.9254559659 | 60.9813988697 | 50.0121832761 |
| H | 38.8436770288 | 61.3904657362 | 50.4070480216 |
| N | 37.0413921832 | 61.6418687577 | 49.2750293649 |
| C | 36.0324634480 | 60.7301473729 | 48.9960564420 |
| H | 35.1884207571 | 60.9898891840 | 48.3771187511 |
| C | 34.9510712976 | 66.1030995343 | 53.8399649254 |
| H | 35.0623862744 | 65.6513220297 | 54.8340556355 |
| H | 35.5439874149 | 67.0262508921 | 53.8548935521 |
| C | 35.5365224491 | 65.1838192725 | 52.7954411607 |
| N | 35.3858656103 | 63.8079782101 | 52.8505523957 |
| H | 34.8902521075 | 63.2864135284 | 53.5778416828 |
| C | 35.9782622743 | 63.2635948696 | 51.7688379318 |
| H | 36.0273691840 | 62.2025599604 | 51.5869752303 |
| N | 36.5114829819 | 64.2105297459 | 51.0002461735 |
| C | 36.2488932882 | 65.4132164430 | 51.6405318932 |
| H | 36.5625738266 | 66.3523101793 | 51.2115694228 |
| C | 45.5237055333 | 67.5657207772 | 45.9852640301 |
| H | 45.4982065915 | 66.9148419250 | 45.1057418018 |
| H | 45.6880622831 | 68.5752476086 | 45.5718076838 |

|    |               |               |               |
|----|---------------|---------------|---------------|
| C  | 44.0911993578 | 67.6814023141 | 46.5364431294 |
| O  | 43.8468541699 | 67.8693656162 | 47.7544649629 |
| O  | 43.1769852024 | 67.6928204467 | 45.6381201479 |
| Fe | 37.1071087978 | 63.8004459043 | 48.9382136762 |
| O  | 38.7836661743 | 63.6790021816 | 46.2630222253 |
| O  | 38.8832603917 | 63.8350616409 | 48.8500345408 |
| H  | 37.7818064936 | 61.2857812568 | 46.2037057450 |
| O  | 38.6201891441 | 61.4550512038 | 46.7581036998 |
| C  | 39.3810737879 | 62.4288733371 | 46.3406292393 |
| C  | 40.6507088040 | 62.1968110854 | 45.8818875736 |
| C  | 39.3732825425 | 64.7195546803 | 47.0079053158 |
| H  | 40.9308092980 | 61.1510910110 | 45.8136580006 |
| C  | 41.5834753875 | 63.1618551489 | 45.4765927519 |
| C  | 38.3732994755 | 65.8022968026 | 47.4202772611 |
| C  | 40.6749677701 | 65.1258834955 | 46.7014540157 |
| H  | 42.4441547499 | 62.8188705181 | 44.9091518556 |
| C  | 41.5833874707 | 64.5140497817 | 45.8072771879 |
| O  | 38.7394895920 | 66.9882344142 | 47.4045428631 |
| O  | 37.1930444997 | 65.3792212694 | 47.7169539910 |
| H  | 40.9645967777 | 66.0831919530 | 47.1229638404 |
| O  | 42.6144611308 | 65.2100671864 | 45.2570212624 |
| H  | 42.6631017794 | 66.1910854036 | 45.4707280500 |
| O  | 39.4083477449 | 65.7046369907 | 50.9306217833 |
| H  | 39.3435324616 | 65.0285226462 | 50.2212388931 |
| H  | 39.7550327350 | 65.2551244334 | 51.7338004887 |
| O  | 36.9099877165 | 60.5529925371 | 45.1327369293 |
| H  | 35.9170556341 | 60.6640793978 | 45.1311206352 |
| H  | 37.0928440569 | 59.5893324738 | 45.3885601099 |
| O  | 43.9620646792 | 63.7883459588 | 43.1335865829 |
| H  | 43.6376115925 | 64.4425603150 | 43.7857557090 |

|   |               |               |               |
|---|---------------|---------------|---------------|
| H | 44.2111155058 | 64.2628915426 | 42.3126143679 |
| H | 46.2967538591 | 67.3382700563 | 46.5774316209 |
| H | 33.9841644885 | 66.3316352702 | 53.7265513466 |
| H | 35.0898532766 | 57.8660848389 | 50.3281497046 |
| H | 30.8529594909 | 63.0981057150 | 49.3538437342 |

Structure of **6c**

|   |               |               |               |
|---|---------------|---------------|---------------|
| C | 31.2290527679 | 62.9405272133 | 48.4779527923 |
| H | 30.6016834865 | 63.4733863154 | 47.7524441380 |
| H | 31.1426581114 | 61.8763444432 | 48.2180478372 |
| C | 32.6704630165 | 63.3765941565 | 48.3018052226 |
| N | 33.1061848933 | 64.0183915230 | 47.1505608457 |
| H | 32.5364278538 | 64.3305160137 | 46.3715036673 |
| C | 34.4476743977 | 64.2071936627 | 47.2324303440 |
| H | 35.0367574769 | 64.7243674370 | 46.4915077169 |
| N | 34.9158779385 | 63.7210137182 | 48.3692465922 |
| C | 33.8222065639 | 63.2063128074 | 49.0380055314 |
| H | 33.9345319967 | 62.7622277214 | 50.0151618128 |
| C | 35.4335271246 | 58.2442993942 | 49.4573950443 |
| H | 34.5838188257 | 58.4602620866 | 48.8007670369 |
| H | 36.0199780794 | 57.4653165185 | 48.9498876779 |
| C | 36.2449279772 | 59.5192519338 | 49.5377687310 |
| N | 37.4789902158 | 59.6817216736 | 50.1556124033 |
| H | 37.9224097653 | 59.0308902116 | 50.8003594493 |
| C | 37.8973492267 | 60.9548930374 | 49.9611432247 |
| H | 38.8193013263 | 61.3442587604 | 50.3690063132 |
| N | 37.0169313317 | 61.6374053657 | 49.2433691122 |
| C | 35.9885581343 | 60.7436005238 | 48.9677721118 |
| H | 35.1322325512 | 61.0323681463 | 48.3782805616 |
| C | 34.9415367855 | 66.1213346793 | 53.8450960531 |
| H | 35.0484541101 | 65.6713509621 | 54.8396007605 |

|    |               |               |               |
|----|---------------|---------------|---------------|
| H  | 35.5212227617 | 67.0524645385 | 53.8600897408 |
| C  | 35.5356375319 | 65.2084233962 | 52.8054854282 |
| N  | 35.4043031397 | 63.8336706374 | 52.8741704909 |
| H  | 34.8948782041 | 63.3186528788 | 53.5977049758 |
| C  | 35.9999009898 | 63.2862972376 | 51.7962949648 |
| H  | 36.0573861833 | 62.2240285122 | 51.6209145719 |
| N  | 36.5149821851 | 64.2317273078 | 51.0168530541 |
| C  | 36.2363859613 | 65.4384699777 | 51.6436781622 |
| H  | 36.5131267913 | 66.3819958526 | 51.1950243747 |
| C  | 45.5402300896 | 67.8061330682 | 46.0280310155 |
| H  | 45.5823012230 | 67.3055358314 | 45.0552118611 |
| H  | 45.6638182810 | 68.8779274264 | 45.8048778211 |
| C  | 44.0828258896 | 67.7379090307 | 46.5411110728 |
| O  | 43.7948332304 | 67.9101731919 | 47.7539213391 |
| O  | 43.1959966473 | 67.6267304052 | 45.6203257038 |
| Fe | 37.0987775802 | 63.8350495837 | 48.9834390812 |
| O  | 38.7603855406 | 63.4714023809 | 46.3859310736 |
| O  | 39.0978175931 | 64.1146564264 | 48.5991858854 |
| H  | 37.7498328220 | 61.3011268873 | 46.4727617348 |
| O  | 38.7209508487 | 61.2551878664 | 46.6870639311 |
| C  | 39.3895978234 | 62.3332687619 | 46.3767701429 |
| C  | 40.7272479959 | 62.1202031658 | 45.9504596836 |
| C  | 39.2829409182 | 64.6020731763 | 47.2961530573 |
| H  | 40.9938463531 | 61.0785380699 | 45.8112039872 |
| C  | 41.6315320516 | 63.0901448303 | 45.6448929043 |
| C  | 38.1922073073 | 65.7412909731 | 47.2017838000 |
| C  | 40.6140433386 | 65.0864878463 | 46.7542807671 |
| H  | 42.5638108981 | 62.7824768791 | 45.1774439388 |
| C  | 41.5458502279 | 64.4963314736 | 45.9416082176 |
| O  | 38.5180373203 | 66.9180020973 | 46.9896034082 |

|   |               |               |                |
|---|---------------|---------------|----------------|
| O | 37.0447703423 | 65.3032407229 | 47.5312126726  |
| H | 40.7874627163 | 66.1308612970 | 46.99444464300 |
| O | 42.5942758231 | 65.1564925840 | 45.3772942889  |
| H | 42.6661669260 | 66.1455725733 | 45.5673542007  |
| O | 40.2031844051 | 65.6006690975 | 50.6926261362  |
| H | 39.7939482753 | 65.0032614955 | 50.0230154177  |
| H | 40.2343636693 | 65.1379334896 | 51.5620377857  |
| O | 36.7599149982 | 60.5330811188 | 45.1500576489  |
| H | 35.7638179409 | 60.5995121977 | 45.1271331203  |
| H | 36.9598313719 | 59.5791095349 | 45.4128482668  |
| O | 44.0020613514 | 63.8087089477 | 43.1774908596  |
| H | 43.6676610763 | 64.4450832224 | 43.8408800633  |
| H | 44.2207164112 | 64.2926922206 | 42.3560447666  |
| H | 46.3152289054 | 67.5238828094 | 46.5934614948  |
| H | 33.9732086147 | 66.3402391786 | 53.7250070281  |
| H | 35.0513218262 | 57.8760137538 | 50.3049118860  |
| H | 30.8084667611 | 63.0947678764 | 49.3719982211  |

## References

<sup>1</sup> J. Borišek, S. Pintar, M. Ogrizek, D. Turk, A. Perdih, M. A. Novič, *ACS Catal.* 2018, **8**, 4334–4345.

<sup>2</sup> F. Madeira, Y.M. Park, J. Lee, N. Buso, T. Gur, N. Madhusoodanan, P. Basutkar, A.R.N. Tivey, S.C. Potter, R.D. Finn, R. Lopez, *Nucleic Acids Res.* 2019, **47**, W636-W641.
